# Supplementary material for: Genome-wide transcriptome and gene family analysis reveal candidate genes associated with potassium uptake of maize colonized by arbuscular mycorrhizal fungi
Source: BMC Plant Biol. 2024 Sep 6;24:838. doi: 10.1186/s12870-024-05398-6 (PMC11378567; doi:10.1186/s12870-024-05398-6)
Supplement: Supplementary file 2 — Supplementary Material 2. [file 12870_2024_5398_MOESM2_ESM.xlsx]

## Sheet: sheet1
Table S1 Primers used in this study.
Gene name	Primer name	Primer sequence
ZmActin1	qZmActin1_F	GGGATTGCCGATCGTATGAG
	qZmActin1_R	GAGCCACCGATCCAGACACT
ZmTubulin	qTub-F	ATTCATGTACTGCCGTATTTGC
	qTub-R	AACACAAAACACCCTTACGATG
Zm00001eb085150	qZm00001eb085150_F	CAAATACCCTGTGCTCTTCCTG
	qZm00001eb085150_R	CTGAGTATCGCCCGGACCT
Zm00001eb361620	qZm00001eb361620_F	GACAACTGGGTGGTGACCGAG
	qZm00001eb361620_R	CGGTGTGGATGAAGAAGGCG
Zm00001eb034810	qZm00001eb034810_F	TGTACGCCAACGAGGTGGTG
	qZm00001eb034810_R	CGTGACGAGGTGCTACTGCC
Zm00001eb419790	qZm00001eb419790_F	TGACCTCTTAGAGCCTGTG
	qZm00001eb419790_R	TCCCAGGGACGAAGTCAACG
Zm00001eb228780	qZm00001eb228780_F	TCCACGCAGGAAGCAGTGGTG
	qZm00001eb228780_R	CAGAGGGTGTGATTCCTTCG
Zm00001eb360670	qZm00001eb360670_F	CTTGAACATAGCTCCTCCAAG
	qZm00001eb360670_R	GTCATAAAGAGCAGACACGG
Zm00001eb039650	qZm00001eb039650_F	AGGGCCAATGCGGTAGCTGCTG
	qZm00001eb039650_R	GTAGTCCATGAGGCCCCCGT
Zm00001eb413920	qZm00001eb413920_F	GCAGCAACGACAGATGCCG
	qZm00001eb413920_R	CGACTGCGCTCACCATTCCG
Zm00001eb275630	qZm00001eb275630_F	GCCATCTCCGTGTTCTCTGCG
	qZm00001eb275630_R	CGTAGTGTTGCAGTGCAAACAG
Zm00001eb387750	qZm00001eb387750_F	ATGCGTAACTGGTTCTGAAG
	qZm00001eb387750_R	ATAAGCAGCTTGTCCCATG
Zm00001eb430810	qZm00001eb430810_F	TGGTCAAGGTGGTACATTTG
	qZm00001eb430810_R	TTCTCTTCATAGGTTTGCCG
Zm00001eb016160	qZm00001eb016160_F	AGGTCCCCAAAGAGAGACTCG
	qZm00001eb016160_R	TCCGAATGCTGGATGTCCTC
