# Supplementary material for: Genome-wide transcriptome and gene family analysis reveal candidate genes associated with potassium uptake of maize colonized by arbuscular mycorrhizal fungi
Source: BMC Plant Biol. 2024 Sep 6;24:838. doi: 10.1186/s12870-024-05398-6 (PMC11378567; doi:10.1186/s12870-024-05398-6)
Supplement: Supplementary file 3 — Supplementary Material 3. [file 12870_2024_5398_MOESM3_ESM.xlsx]

## Sheet: Sheet1
Table S2 Upregulated genes in maize root with AMF inoculation under different K conditions

## Sheet: 0.6 mM K_AMF vs 0.6 mM K_NM
Gene id	MeanTPM (0.6 mM K_AMF)	MeanTPM (0.6 mM K_NM)	log2FoldChange	pValue	qValue
Zm00001eb343690	83.8972	61.4918	0.448229	0.0465552	0.502353
Zm00001eb188410	0.750296	0.346431	1.11489	0.0139412	0.240141
Zm00001eb225670	269.315	213.975	0.331855	0.0498155	0.516311
Zm00001eb430610	13.8254	9.25548	0.578939	0.0378088	0.446227
Zm00001eb316100	24.279	17.6001	0.464129	0.00378565	0.0953704
Zm00001eb164410	18.905	13.4518	0.49097	0.0067728	0.148553
Zm00001eb010460	13.957	9.63742	0.534267	0.00907266	0.180552
Zm00001eb204480	18.5216	14.058	0.39782	0.0330407	0.418213
Zm00001eb178890	2.09831	1.48326	0.500456	0.0139031	0.239618
Zm00001eb167800	7.24453	4.62354	0.647894	0.0333012	0.419447
Zm00001eb200830	40.8786	27.7486	0.558931	0.0485531	0.510755
Zm00001eb406180	5.18803	2.4438	1.08606	0.00376895	0.0951028
Zm00001eb130310	6.8506	3.56762	0.941269	0.0191403	0.297417
Zm00001eb216660	14.4416	9.25245	0.642323	0.00321106	0.0845933
Zm00001eb037730	9.11191	6.04391	0.592273	0.00923724	0.182665
Zm00001eb002790	117.565	88.2062	0.414504	0.0113523	0.209515
Zm00001eb234860	35.1755	20.7747	0.759744	9.67364e-06	0.000746757
Zm00001eb213650	4.34669	2.75886	0.655843	0.0402511	0.462284
Zm00001eb391680	10.3027	3.94629	1.38445	0.00222213	0.0641482
Zm00001eb370590	63.6171	47.342	0.426294	0.029009	0.386588
Zm00001eb307290	14.555	9.50244	0.615147	0.00104182	0.0356751
Zm00001eb318030	21.5929	18.3306	0.236305	0.0400095	0.461476
Zm00001eb118710	45.8258	30.2713	0.598209	0.0101776	0.196174
Zm00001eb012070	12.9277	9.17312	0.494982	0.00573693	0.131206
Zm00001eb188590	2.45719	1.35191	0.862008	0.0491497	0.513575
Zm00001eb411200	2.81783	1.75064	0.686704	0.0378965	0.446588
Zm00001eb101060	0.088376	0.005353	4.04524	0.0479375	0.507868
Zm00001eb000020	47.5307	36.6688	0.374305	0.0448963	0.492504
Zm00001eb315660	339.517	248.903	0.447898	0.0319084	0.409643
Zm00001eb353270	1.48999	0.795897	0.904649	0.000509732	0.0207944
Zm00001eb125730	22.552	16.176	0.479404	0.0110154	0.205998
Zm00001eb100670	0.174047	0.0001	10.7653	0.0494571	1
Zm00001eb127640	18.857	14.242	0.404943	0.00628003	0.140543
Zm00001eb173970	6.80199	4.49468	0.59774	0.0368053	0.439862
Zm00001eb069640	17.2764	10.0603	0.780128	0.0477432	0.507291
Zm00001eb043630	38.5152	32.2761	0.254964	0.0458417	0.497983
Zm00001eb385580	7.77559	5.2157	0.576091	0.0296728	0.392215
Zm00001eb071760	9.94443	6.68491	0.572981	0.0386667	0.451574
Zm00001eb395530	20.6926	14.0577	0.557754	0.00911337	0.181132
Zm00001eb089420	3.39053	2.57263	0.398267	0.0477245	0.507291
Zm00001eb072860	2.63696	1.86165	0.502292	0.008367	0.171983
Zm00001eb061750	11.467	8.35254	0.457196	0.0467207	0.502814
Zm00001eb266080	2.19342	0.473814	2.21079	0.0362616	0.436898
Zm00001eb318590	4.96599	3.02855	0.713452	0.000322496	0.0146124
Zm00001eb369340	14.2818	10.3412	0.465771	0.0482304	0.509934
Zm00001eb233500	20.3844	2.74305	2.89361	0.00118895	0.039713
Zm00001eb199240	20.4924	16.1455	0.343956	0.0271589	0.370298
Zm00001eb078620	6.46772	4.85922	0.412532	0.0362894	0.436898
Zm00001eb417140	25.5649	19.4404	0.395106	0.00575835	0.131559
Zm00001eb141560	30.0144	22.5071	0.415272	0.00398767	0.0996527
Zm00001eb358210	23.1069	17.2222	0.424057	0.0437275	0.486165
Zm00001eb270270	26.5305	18.9214	0.487636	0.0352308	0.432718
Zm00001eb101230	695.413	500.648	0.474074	0.0209842	0.316272
Zm00001eb076760	7.10268	4.06375	0.80555	0.0128615	0.227208
Zm00001eb173060	74.4032	55.5014	0.42284	0.00530781	0.124209
Zm00001eb400170	10.2438	7.62573	0.425806	0.0253782	0.353891
Zm00001eb156730	5.04451	2.09956	1.26463	0.0340726	0.424739
Zm00001eb028820	76.2781	43.6712	0.804587	0.00308955	0.082353
Zm00001eb124940	11.4911	6.09553	0.914694	0.00797222	0.16561
Zm00001eb431280	0.345021	0.0001	11.7525	0.0406964	0.465975
Zm00001eb034970	4.8468	3.10822	0.640946	0.0126982	0.225183
Zm00001eb119540	19.7529	13.4184	0.557849	0.026919	0.368475
Zm00001eb320870	169.545	123.253	0.46004	0.031822	0.409417
Zm00001eb348150	3.62749	2.77132	0.388398	0.0402171	0.462284
Zm00001eb280720	21.6428	13.6291	0.667199	0.00379559	0.0954845
Zm00001eb191510	0.872325	0.461806	0.917578	0.0248587	0.350082
Zm00001eb342370	156.22	119.26	0.389467	0.0239086	0.342431
Zm00001eb218280	19.3559	12.2408	0.661077	0.0171806	0.276445
Zm00001eb397880	39.9408	30.7	0.379622	0.00344382	0.0886586
Zm00001eb057130	0.18786	0.0001	10.8754	0.019238	0.298194
Zm00001eb053620	2.26459	1.22573	0.88561	0.0378017	0.446227
Zm00001eb079860	8.29149	5.76325	0.52475	0.0344668	0.426929
Zm00001eb007640	2.10215	1.06194	0.985167	0.0162721	0.267471
Zm00001eb234940	1.36582	0.509422	1.42283	0.0270545	0.369325
Zm00001eb066500	6.00438	3.83156	0.648083	0.0202641	0.308441
Zm00001eb073420	0.161367	0.0186883	3.11013	0.00657397	0.145127
Zm00001eb302780	0.279602	0.0001	11.4492	0.0163217	0.267723
Zm00001eb303780	2.75424	1.53951	0.839186	0.0115759	0.212185
Zm00001eb429480	0.160906	0.0001	10.652	0.0249374	0.350559
Zm00001eb135720	16.2909	12.2381	0.412684	0.0303748	0.397171
Zm00001eb405220	13.2485	9.92942	0.416048	0.0259146	0.359606
Zm00001eb402640	27.6595	17.2447	0.681623	0.00712348	0.153472
Zm00001eb035720	9.00129	6.90713	0.382047	0.0423456	0.476591
Zm00001eb275520	3.12774	1.77625	0.816284	0.023067	0.335264
Zm00001eb004320	25.1633	19.3439	0.379446	0.00864182	0.174533
Zm00001eb011270	1.41932	0.824096	0.784319	0.0159176	0.263305
Zm00001eb277910	3.19087	1.50073	1.08829	0.0034379	0.0886586
Zm00001eb043770	66.1121	55.3062	0.257472	0.0268342	0.367958
Zm00001eb342070	237.008	172.327	0.459785	0.00501842	0.118719
Zm00001eb169090	164.703	105.77	0.638936	0.0203559	0.309536
Zm00001eb235050	2.44505	1.37338	0.832133	0.0416378	0.471448
Zm00001eb142560	8.63375	5.62524	0.618073	0.00777195	0.162765
Zm00001eb055900	1.47889	0.552426	1.42066	0.00932939	0.183906
Zm00001eb432920	9.69605	6.92437	0.485715	0.0331822	0.419155
Zm00001eb058300	4.59213	3.36135	0.450123	0.0436418	0.48551
Zm00001eb166200	157.015	127.787	0.297166	0.014429	0.24655
Zm00001eb126840	2.42067	1.4467	0.742636	0.0433778	0.483998
Zm00001eb005840	34.4566	27.7356	0.313041	0.0343557	0.426322
Zm00001eb288100	74.5357	46.8026	0.671345	0.00321175	0.0845933
Zm00001eb019860	107.609	85.8116	0.326556	0.03314	0.418791
Zm00001eb398600	0.203661	0.00729133	4.80385	0.0385036	0.451275
Zm00001eb112170	12.2883	8.26772	0.571729	0.00158846	0.0495691
Zm00001eb202660	1.31854	0.730694	0.851607	0.0496325	0.515689
Zm00001eb224630	6.05018	3.40297	0.830184	0.021552	0.322702
Zm00001eb280680	22.5636	15.5341	0.538561	0.0137446	0.238066
Zm00001eb064320	0.17306	0.0001	10.7571	0.0223636	0.329334
Zm00001eb153750	21.1104	14.183	0.57379	0.0335237	0.420915
Zm00001eb226490	18.3726	8.59969	1.0952	0.00673625	0.147999
Zm00001eb014980	28.651	19.3801	0.564009	0.00822182	0.169892
Zm00001eb192890	7.35778	4.67164	0.655342	0.00768685	0.161398
Zm00001eb241950	35.1114	24.7732	0.503162	0.0166705	0.270886
Zm00001eb427800	2.04592	1.3438	0.60643	0.0459072	0.498308
Zm00001eb321170	21.4309	15.6596	0.452649	0.0105377	0.200504
Zm00001eb009640	44.6947	34.3945	0.377925	0.0351507	0.432679
Zm00001eb199670	36.6548	28.9286	0.341505	0.028691	0.38366
Zm00001eb402220	3.50169	2.31753	0.595462	0.0432264	0.482998
Zm00001eb084070	4.84441	3.09279	0.647413	0.00694655	0.151132
Zm00001eb270660	7.91222	5.75135	0.460182	0.00684667	0.149375
Zm00001eb399530	7.12142	4.41718	0.689038	0.012964	0.228599
Zm00001eb279020	35.1537	27.8421	0.33641	0.0489027	0.51201
Zm00001eb152570	7.25039	4.68191	0.630961	0.0123126	0.220977
Zm00001eb419790	39.4228	29.162	0.43494	0.0472597	0.505657
Zm00001eb180180	1.35627	0.666024	1.02599	0.00334704	0.0870437
Zm00001eb024930	11.1946	8.06119	0.473734	0.00991706	0.19281
Zm00001eb113920	2.0505	0.540765	1.9229	0.00353103	0.0903389
Zm00001eb294860	29.5278	21.1165	0.4837	0.0288568	0.385217
Zm00001eb058480	10.642	6.38402	0.737227	5.55928e-05	0.0033169
Zm00001eb097390	19.2034	15.5045	0.308675	0.0438353	0.486758
Zm00001eb076380	2.56261	1.77405	0.530571	0.0298245	0.3931
Zm00001eb425120	6.41099	3.85746	0.732895	0.0160364	0.26485
Zm00001eb323160	12.7893	7.91889	0.691569	0.00191825	0.0574447
Zm00001eb303060	21.0025	14.9466	0.490743	0.0021129	0.061621
Zm00001eb337180	5.57899	3.79483	0.555969	0.0211461	0.318147
Zm00001eb114780	1.82372	1.26134	0.531924	0.0233713	0.337515
Zm00001eb206670	10.3665	6.18123	0.745958	0.000398565	0.0172348
Zm00001eb330760	33.3575	28.2296	0.240801	0.0401115	0.461725
Zm00001eb424060	25.7557	16.2969	0.660292	0.00137299	0.0442527
Zm00001eb002800	165.153	132.662	0.316053	0.0173668	0.278011
Zm00001eb301580	1.55269	1.01567	0.612337	0.0343911	0.426329
Zm00001eb038200	15.4933	7.37545	1.07084	0.0457422	0.497247
Zm00001eb066280	56.6219	42.8467	0.402178	0.0280308	0.378066
Zm00001eb374980	48.0518	34.6531	0.471604	0.00172502	0.0528219
Zm00001eb423840	97.4319	67.3515	0.532685	0.0297326	0.392716
Zm00001eb138830	5.55682	4.18154	0.410223	0.0294049	0.389705
Zm00001eb269150	9.02473	6.95571	0.375687	0.0313936	0.405239
Zm00001eb234360	16.187	10.3479	0.645496	0.0346459	0.428469
Zm00001eb414260	60.1466	50.2241	0.260101	0.0363176	0.436898
Zm00001eb192330	7.38179	4.43347	0.735534	0.00817568	0.169051
Zm00001eb351980	7.10847	5.32966	0.415495	0.0388409	0.452599
Zm00001eb010430	51.3806	36.2423	0.503549	0.00204837	0.0600751
Zm00001eb402890	33.45	22.3404	0.582352	0.0164291	0.26864
Zm00001eb166120	17.9	12.5969	0.50689	0.0132827	0.232346
Zm00001eb312250	5.66287	3.99251	0.504238	0.0414997	0.470772
Zm00001eb100630	9.54117	5.91221	0.690469	0.0145622	0.247858
Zm00001eb054730	50.0559	34.217	0.548828	0.0464303	0.501589
Zm00001eb411550	8.74704	7.14118	0.292632	0.0434466	0.48453
Zm00001eb269340	0.214777	0.0001	11.0686	0.00200031	0.0590537
Zm00001eb343760	15.6718	8.8628	0.822333	0.0411997	0.469241
Zm00001eb334230	44.7515	31.4543	0.508678	0.00214332	0.0622757
Zm00001eb008260	0.980721	0.40345	1.28145	0.0354031	0.432964
Zm00001eb328560	455.371	340.388	0.419862	0.0483373	0.510419
Zm00001eb346830	70.2078	50.3691	0.479092	0.0345884	0.427927
Zm00001eb257810	22.1529	18.3747	0.269771	0.0496324	0.515689
Zm00001eb274320	1.59727	0.656953	1.28175	0.0103498	0.198269
Zm00001eb051580	10.5262	8.70534	0.274015	0.0347704	0.429669
Zm00001eb371180	3.81522	2.44403	0.642503	0.0417947	0.472575
Zm00001eb355660	101.256	79.6553	0.34617	0.013578	0.235965
Zm00001eb420940	9.65473	6.61038	0.546502	0.0477845	0.507451
Zm00001eb180150	6.06845	3.61385	0.74779	0.0144509	0.246746
Zm00001eb295020	10.1682	6.8244	0.575286	0.0125573	0.224338
Zm00001eb008830	66.9239	54.1515	0.305522	0.0226118	0.331738
Zm00001eb280250	31.9664	25.6869	0.315523	0.0422788	0.476498
Zm00001eb253390	54.318	46.85	0.21338	0.0421697	0.475611
Zm00001eb278170	5.09436	3.46329	0.556759	0.0359097	0.435019
Zm00001eb001190	30.8266	21.895	0.493571	0.0284324	0.381714
Zm00001eb246230	11.3482	7.98212	0.507623	0.0239919	0.343257
Zm00001eb328240	1.87226	1.27017	0.559764	0.0175093	0.279577
Zm00001eb248740	4.64486	2.96024	0.649921	0.0428569	0.480588
Zm00001eb254100	5.25253	3.31627	0.663451	0.0388963	0.453075
Zm00001eb089360	5.85108	2.44325	1.25991	0.00388344	0.0973633
Zm00001eb262650	5.9071	3.12415	0.918983	0.0318126	0.409417
Zm00001eb269840	76.5269	50.4629	0.600746	0.0207782	0.313821
Zm00001eb405650	12.5606	8.83743	0.507206	0.00116883	0.0391355
Zm00001eb192440	11.2308	7.96651	0.495441	0.0267651	0.367817
Zm00001eb353470	3.76909	2.40838	0.646158	0.0461468	0.499735
Zm00001eb226370	2.05674	1.10861	0.891611	0.024554	0.347355
Zm00001eb306350	103.863	71.1352	0.546052	0.036196	0.436898
Zm00001eb350820	20.3231	13.9381	0.544091	0.0355397	0.433351
Zm00001eb178020	1.46603	0.67851	1.11147	0.0435713	0.48546
Zm00001eb372830	48.0265	32.5185	0.56257	0.0152175	0.255291
Zm00001eb084810	3.9694	2.27244	0.804676	0.0158575	0.263008
Zm00001eb370520	17.8131	12.9852	0.456064	0.0332917	0.419447
Zm00001eb358690	11.8699	9.35836	0.342982	0.0249287	0.350559
Zm00001eb348890	19.9593	10.5351	0.921849	0.0155811	0.259663
Zm00001eb067730	20.9299	15.5707	0.426738	0.0361791	0.436898
Zm00001eb326850	24.6972	18.372	0.426838	0.0305665	0.398488
Zm00001eb101010	12.1125	9.84796	0.298601	0.0399019	0.461121
Zm00001eb024150	16.0101	11.52	0.474834	0.0160773	0.265107
Zm00001eb109470	0.240035	0.0001	11.229	0.0240337	0.343257
Zm00001eb046680	6.8484	4.34543	0.656269	0.0487815	0.511608
Zm00001eb154410	7.64509	3.97259	0.944455	0.0023574	0.0673845
Zm00001eb017330	5.87872	3.56978	0.71967	0.00159343	0.0495691
Zm00001eb424770	7.63838	6.04996	0.336342	0.0481646	0.509411
Zm00001eb002390	260.85	183.327	0.5088	0.0465084	0.502259
Zm00001eb098150	69.8663	55.4691	0.332911	0.0383668	0.450431
Zm00001eb322560	3.63094	2.30175	0.657614	0.00446322	0.108674
Zm00001eb217640	10.5634	8.05791	0.390602	0.0297804	0.393084
Zm00001eb363360	12.8366	8.53904	0.588113	0.0321851	0.410715
Zm00001eb409790	3.60561	2.11602	0.768888	0.0432507	0.483098
Zm00001eb347080	70.1795	47.6837	0.557551	0.00118399	0.0395897
Zm00001eb093510	7.2717	4.88887	0.572792	0.00939965	0.184941
Zm00001eb417110	7.01404	4.84563	0.53356	0.0390962	0.454726
Zm00001eb136340	2.80946	1.42753	0.976768	0.0307654	0.400103
Zm00001eb075170	0.625866	0.241574	1.37339	0.0354002	0.432964
Zm00001eb390180	25.1421	15.5238	0.695624	0.0231159	0.335264
Zm00001eb139250	12.4527	9.22488	0.432858	0.0171743	0.276445
Zm00001eb421110	7.19505	5.4565	0.399029	0.0473558	0.505717
Zm00001eb387850	2.71167	1.3284	1.02949	0.000516876	0.0209593
Zm00001eb329840	9.98748	6.52216	0.614771	0.0225644	0.331355
Zm00001eb325120	34.249	24.2058	0.500708	0.00754139	0.159847
Zm00001eb391490	4.29069	2.94519	0.542851	0.0420112	0.474508
Zm00001eb055460	37.216	28.4452	0.387738	0.00159742	0.0496438
Zm00001eb315170	19.5516	16.0369	0.285893	0.0415648	0.471168
Zm00001eb081110	47.6718	35.7734	0.414249	0.0203896	0.309609
Zm00001eb322060	56.4491	43.8571	0.364141	0.0180164	0.285054
Zm00001eb285760	7.41407	3.40721	1.12167	0.00247819	0.0698632
Zm00001eb165250	0.639845	0.320694	0.996527	0.0353422	0.432964
Zm00001eb043960	2.83801	1.35922	1.06211	0.0236418	0.339215
Zm00001eb249200	432.974	290.568	0.575406	0.010754	0.202783
Zm00001eb134020	50.3572	38.6083	0.383286	0.0295064	0.39072
Zm00001eb250820	0.199042	0.025178	2.98284	0.0399725	0.461476
Zm00001eb110600	25.2776	20.137	0.328008	0.0439669	0.487134
Zm00001eb085630	1.76522	1.2182	0.535096	0.041358	0.470017
Zm00001eb250650	5.97386	3.75536	0.669711	0.00518553	0.12191
Zm00001eb002400	198.655	129.458	0.617785	0.00618787	0.139178
Zm00001eb218120	6.3382	4.1925	0.596262	0.0152555	0.255462
Zm00001eb129030	91.1277	60.9643	0.579926	0.0413391	0.470017
Zm00001eb409600	0.256745	0.0001	11.3261	0.00356101	0.090957
Zm00001eb336380	0.211102	0.0001	11.0437	0.0188398	0.294798
Zm00001eb383870	7.10558	4.45288	0.674214	0.00780318	0.162856
Zm00001eb248500	17.9728	12.2951	0.547724	0.0381942	0.449249
Zm00001eb186200	6.38324	4.23477	0.592006	0.0241503	0.344293
Zm00001eb324490	4.9858	3.27844	0.604815	0.0240126	0.343257
Zm00001eb281360	8.30477	5.69895	0.543244	0.0163126	0.267723
Zm00001eb199520	8.13982	6.0454	0.429159	0.011606	0.212185
Zm00001eb388990	101.529	79.4474	0.353824	0.0209042	0.315288
Zm00001eb278700	6.96232	4.29991	0.695263	0.0148753	0.251793
Zm00001eb284070	15.3037	9.64138	0.666566	0.00139802	0.0447824
Zm00001eb302270	1.17893	0.680923	0.791917	0.0179106	0.283954
Zm00001eb010170	23.1896	19.0119	0.286573	0.0238926	0.342431
Zm00001eb153350	6.41079	4.30575	0.574237	0.0245823	0.347441
Zm00001eb030000	8.35293	5.06825	0.720796	0.000559118	0.0222963
Zm00001eb213770	2.40604	1.38585	0.795888	0.00163145	0.0505508
Zm00001eb425110	9.97946	4.59368	1.11931	0.018868	0.295033
Zm00001eb113790	152.209	124.821	0.286193	0.0165685	0.269931
Zm00001eb322350	6.65806	4.92421	0.435209	0.0490607	0.513083
Zm00001eb291140	21.5625	12.8397	0.747914	0.0135038	0.234937
Zm00001eb209890	36.2709	23.9941	0.596133	0.0198476	0.303784
Zm00001eb431100	0.168985	0.0001	10.7227	0.00171021	0.052471
Zm00001eb353110	38.2167	25.9708	0.557311	0.0144042	0.246399
Zm00001eb247080	24.8515	9.1915	1.43496	3.07595e-05	0.00198281
Zm00001eb121470	5.67202	4.19021	0.436842	0.0320044	0.410244
Zm00001eb086360	1.20476	0.6268	0.942669	0.0132724	0.232334
Zm00001eb208370	16.2918	13.46	0.275466	0.0485027	0.510653
Zm00001eb119220	39.6954	31.7308	0.323088	0.035411	0.432964
Zm00001eb376100	11.7823	8.66693	0.443028	0.00709313	0.153043
Zm00001eb214280	6.85464	3.10499	1.14249	1.34267e-05	0.0009877
Zm00001eb357920	4.62263	3.27833	0.495752	0.0231133	0.335264
Zm00001eb061630	24.1478	17.0003	0.506333	0.00290419	0.0790222
Zm00001eb397270	36.9197	28.6378	0.366466	0.0409121	0.467157
Zm00001eb154570	5.72232	3.65163	0.648057	0.034158	0.425295
Zm00001eb153700	11.2362	8.32375	0.432854	0.0424476	0.476858
Zm00001eb042370	4.21243	2.62116	0.684447	0.000157405	0.00800181
Zm00001eb057750	2.83814	1.81798	0.642609	0.0178758	0.28376
Zm00001eb015080	3.82957	1.94749	0.975567	0.0319037	0.409643
Zm00001eb351430	9.61369	6.27603	0.615237	0.032541	0.41373
Zm00001eb051360	0.637932	0.320506	0.993051	0.0467074	0.502814
Zm00001eb126990	22.011	15.4993	0.50602	0.00822828	0.169913
Zm00001eb256000	7.54182	4.13407	0.86735	0.0366983	0.439424
Zm00001eb100660	15.3379	10.4552	0.552871	0.0197224	0.30285
Zm00001eb046010	4.50083	2.94609	0.611388	0.0430335	0.481359
Zm00001eb236430	12.1738	8.17273	0.574895	0.00441685	0.107966
Zm00001eb248870	5.38722	3.35749	0.682157	0.0271709	0.370301
Zm00001eb018910	1.35001	0.293064	2.20368	0.00102227	0.0352762
Zm00001eb227220	3.02786	1.91703	0.659425	0.022035	0.327114
Zm00001eb148450	8.52463	3.2215	1.40391	1.70525e-06	0.000158288
Zm00001eb185390	36.7757	29.468	0.319604	0.0223806	0.329429
Zm00001eb196940	64.7541	45.3472	0.513958	0.00247164	0.0697414
Zm00001eb012980	22.7512	17.8861	0.347098	0.0320491	0.41048
Zm00001eb283880	4.36856	2.36961	0.882506	0.00383636	0.0962599
Zm00001eb168220	65.9382	49.7571	0.406214	0.025688	0.357097
Zm00001eb151400	7.59281	5.3714	0.499335	0.0110619	0.206472
Zm00001eb315100	16.168	10.6486	0.602473	3.65486e-05	0.00230839
Zm00001eb058240	6.90284	4.56101	0.597838	0.0427843	0.479945
Zm00001eb158740	26.6227	21.0813	0.336692	0.0174344	0.27895
Zm00001eb011840	107.878	89.7384	0.265597	0.0171151	0.276103
Zm00001eb348070	0.358654	0.0001	11.8084	0.00314315	0.0834189
Zm00001eb095620	5.28606	2.5766	1.03673	9.94624e-05	0.00537992
Zm00001eb034700	1.13955	0.508789	1.16332	0.00546515	0.126905
Zm00001eb377460	52.9493	43.03	0.299268	0.0445766	0.490373
Zm00001eb063350	2.55367	0.797408	1.67918	0.0233118	0.3372
Zm00001eb231870	9.06887	5.62244	0.689727	0.0137279	0.237911
Zm00001eb077840	240.598	189.334	0.345685	0.0364276	0.436898
Zm00001eb412560	1.92405	0.8721	1.14158	0.00159123	0.0495691
Zm00001eb152460	2.06213	1.40109	0.557592	0.0485851	0.5109
Zm00001eb377970	6.15776	3.98709	0.627069	0.0143845	0.246286
Zm00001eb062740	8.31686	5.37282	0.63036	0.0191794	0.297433
Zm00001eb074870	8.09208	5.74455	0.494318	0.0413497	0.470017
Zm00001eb191640	3.86713	1.73767	1.15411	0.00787163	0.163956
Zm00001eb407460	16.8947	12.6236	0.420452	0.029552	0.391095
Zm00001eb190160	1.63103	0.734949	1.15007	0.0371728	0.442354
Zm00001eb328900	7.50175	4.62054	0.699167	0.00563967	0.129646
Zm00001eb393110	0.438717	0.129387	1.7616	0.00502003	0.118719
Zm00001eb321530	16.5725	13.4883	0.297077	0.0342023	0.42548
Zm00001eb287900	5.93041	3.8834	0.610811	0.00505776	0.11943
Zm00001eb170530	3.29776	1.86432	0.822836	0.00920508	0.182249
Zm00001eb372750	83.5899	58.6592	0.510972	0.032209	0.410715
Zm00001eb223060	6.51067	5.25554	0.308968	0.0347263	0.429294
Zm00001eb076230	4.58984	2.92133	0.651819	0.0100138	0.193852
Zm00001eb151140	66.611	48.9042	0.445802	0.0498163	0.516311
Zm00001eb068660	1.78214	0.759425	1.23063	0.0199689	0.304849
Zm00001eb235450	41.3684	20.022	1.04694	6.89735e-06	0.000550099
Zm00001eb054890	0.861051	0.5489	0.649557	0.0172887	0.277187
Zm00001eb242480	2.87001	1.87792	0.611917	0.00527381	0.123598
Zm00001eb070510	1.65991	1.16542	0.510251	0.0469523	0.503919
Zm00001eb043610	63.8903	52.3947	0.286177	0.0354761	0.433252
Zm00001eb147740	9.40028	5.54539	0.761415	0.00125909	0.0417437
Zm00001eb062860	0.340544	0.111825	1.6066	0.0486817	0.511076
Zm00001eb304870	0.262065	0.0208813	3.64964	0.00321696	0.0846592
Zm00001eb067430	9.11912	5.85165	0.640051	0.0265872	0.366016
Zm00001eb169380	12.317	8.27002	0.574694	0.0127749	0.226158
Zm00001eb074090	0.248798	0.0637503	1.96447	0.0313543	0.405124
Zm00001eb023970	29.9471	23.0843	0.375505	0.0254515	0.35444
Zm00001eb366840	2.97095	1.44295	1.0419	0.0332928	0.419447
Zm00001eb279830	11.3126	8.94773	0.338332	0.0217561	0.324825
Zm00001eb074540	8.95124	6.0001	0.577102	0.00937799	0.184631
Zm00001eb317760	2.50332	1.58946	0.655311	0.0114083	0.210175
Zm00001eb249940	939.89	562.901	0.73961	0.00925045	0.18272
Zm00001eb312630	16.3272	12.5156	0.383555	0.0460199	0.498706
Zm00001eb278870	0.370423	0.119425	1.63306	0.0206083	0.312312
Zm00001eb096930	5.77117	2.7482	1.07038	0.000561818	0.0223234
Zm00001eb091920	247.85	155.701	0.670687	0.0355304	0.433351
Zm00001eb034780	6.96602	4.91816	0.502216	0.0480068	0.508161
Zm00001eb275580	1.60131	0.430702	1.89449	0.00416377	0.102908
Zm00001eb022050	131.251	99.0113	0.406661	0.00899978	0.179883
Zm00001eb415620	13.1724	9.27649	0.505863	0.0105025	0.200171
Zm00001eb314930	2.59549	1.77482	0.548336	0.0338851	0.423245
Zm00001eb194570	1.75927	0.784985	1.16424	0.00556255	0.12844
Zm00001eb282580	11.3089	7.28553	0.634347	0.0216694	0.32384
Zm00001eb431400	6.47012	3.90302	0.729201	0.0166544	0.270766
Zm00001eb400780	2.99748	1.73729	0.786912	0.0111683	0.207524
Zm00001eb289460	201.253	160.247	0.328706	0.0437781	0.486555
Zm00001eb134870	2.52528	1.25567	1.00798	0.0213988	0.320655
Zm00001eb431870	1.58704	1.06312	0.578028	0.0125723	0.224478
Zm00001eb186940	9.17218	6.4548	0.506894	0.0438431	0.486758
Zm00001eb139470	2.05588	1.22446	0.747614	0.0373652	0.443288
Zm00001eb071660	2.81237	1.62929	0.787539	0.00163428	0.0505882
Zm00001eb142130	16.015	8.78532	0.866261	0.0362577	0.436898
Zm00001eb162630	36.498	27.1011	0.429465	0.00130126	0.0425996
Zm00001eb186440	13.9848	8.73882	0.678344	0.00279903	0.0768971
Zm00001eb323480	8.15229	4.86224	0.745584	0.0158936	0.263049
Zm00001eb290330	3.31482	1.24016	1.4184	0.0322233	0.410715
Zm00001eb127370	12.8309	4.14696	1.62949	0.0023427	0.0671332
Zm00001eb217780	4.55071	2.01939	1.17217	0.00784973	0.163609
Zm00001eb122420	12.8695	10.0931	0.350584	0.044761	0.491537
Zm00001eb427960	3.14057	1.79043	0.810718	0.0147336	0.250343
Zm00001eb316070	11.623	8.37679	0.472515	0.0414683	0.470772
Zm00001eb382060	6.12426	3.23805	0.919409	0.016784	0.272025
Zm00001eb080080	27.4781	21.2684	0.369565	0.0381836	0.449249
Zm00001eb418850	93.1141	69.5893	0.420135	0.0411431	0.468938
Zm00001eb404590	13.8649	8.29544	0.741043	0.00491611	0.117327
Zm00001eb218820	5.37516	3.22459	0.737192	0.000420979	0.0179802
Zm00001eb293270	5.76106	3.26753	0.818136	0.0454081	0.495165
Zm00001eb057870	42.4834	33.3451	0.349425	0.0384637	0.45123
Zm00001eb193720	65.739	49.5731	0.407193	0.00727819	0.15564
Zm00001eb318360	40.6191	31.2979	0.376095	0.00606993	0.137216
Zm00001eb050410	30.8491	24.0477	0.359329	0.0478124	0.507461
Zm00001eb386750	28.8674	20.8118	0.472039	0.0478996	0.507811
Zm00001eb362710	18.6154	11.9645	0.637733	0.00854469	0.173468
Zm00001eb118800	10.4821	6.58693	0.670253	0.000356882	0.0158263
Zm00001eb080320	1.13289	0.630411	0.845641	0.0298065	0.393084
Zm00001eb148550	5.33556	2.78431	0.938321	0.00237393	0.0675943
Zm00001eb378090	6.94446	3.90012	0.832345	0.00198527	0.0587762
Zm00001eb238800	195.165	127.228	0.617275	0.00630583	0.14067
Zm00001eb079340	3.88941	2.24384	0.793579	0.000994801	0.0345572
Zm00001eb227620	8.83193	5.27722	0.742951	0.00184416	0.0557062
Zm00001eb127880	2.77534	1.82915	0.601494	0.00267662	0.0741861
Zm00001eb315990	28.4052	19.0703	0.574829	0.000226013	0.0108375
Zm00001eb430680	173.213	137.629	0.331769	0.0450848	0.493426
Zm00001eb218530	24.0597	10.0434	1.26038	0.0473624	0.505717
Zm00001eb364950	64.6975	46.3993	0.479608	0.00313793	0.0833512
Zm00001eb145730	24.3869	17.7496	0.458322	0.0265365	0.365828
Zm00001eb272570	0.287192	0.0739453	1.95748	0.0451821	0.493906
Zm00001eb190590	4.63906	3.28317	0.498742	0.00947694	0.185815
Zm00001eb002470	7.11903	5.5166	0.367901	0.0408645	0.466822
Zm00001eb030260	12.6322	7.09034	0.833179	0.00478834	0.114979
Zm00001eb311960	1.50285	0.984312	0.610513	0.0247879	0.349715
Zm00001eb124770	24.1962	18.0518	0.422638	0.0384389	0.451109
Zm00001eb392700	14.4257	11.6415	0.309369	0.0126259	0.224595
Zm00001eb266440	163.866	115.331	0.506736	0.000416306	0.0178049
Zm00001eb314120	22.0532	16.6563	0.40492	0.0260994	0.361572
Zm00001eb058150	17.4694	12.5377	0.478559	0.00101373	0.035059
Zm00001eb267710	20.6659	17.4102	0.247323	0.0387676	0.452215
Zm00001eb196240	22.114	17.6791	0.322913	0.0430312	0.481359
Zm00001eb431720	15.0191	9.54926	0.653338	0.00715639	0.153877
Zm00001eb200840	2.14646	1.31723	0.704445	0.0276764	0.374902
Zm00001eb144940	11.4984	4.33172	1.40843	0.00269264	0.074564
Zm00001eb197590	15.3652	11.7374	0.388552	0.0136623	0.236909
Zm00001eb331880	3.92891	2.35378	0.739148	0.00689994	0.150432
Zm00001eb110060	32.9843	20.7538	0.668405	0.0138964	0.239618
Zm00001eb082040	9.05238	5.7945	0.643613	0.0358062	0.434567
Zm00001eb105870	1.65203	1.04454	0.661366	0.0286292	0.38316
Zm00001eb428530	3.82473	2.50818	0.608714	0.0028541	0.0779618
Zm00001eb346700	2.00752	0.671263	1.58046	0.0170221	0.275354
Zm00001eb313530	23.0486	13.4127	0.781082	0.0274763	0.373162
Zm00001eb280500	1.23604	0.492011	1.32896	0.0230571	0.335264
Zm00001eb154710	253.86	193.069	0.394914	0.00677573	0.148553
Zm00001eb240900	56.4033	39.3525	0.519326	0.0170995	0.276103
Zm00001eb253330	2.64483	1.76997	0.579445	0.0124867	0.223332
Zm00001eb044540	19.0572	13.1475	0.535553	0.0200666	0.30618
Zm00001eb232960	26.5144	21.3965	0.3094	0.0449609	0.492868
Zm00001eb214940	2.82349	1.81953	0.63391	0.0232793	0.336951
Zm00001eb368130	2.8751	1.94532	0.563607	0.0281249	0.379007
Zm00001eb060950	9.2612	4.04559	1.19485	0.00188853	0.0569913
Zm00001eb412550	3.4609	0.922458	1.90759	0.00780073	0.162856
Zm00001eb288270	0.369418	0.125833	1.55374	0.029594	0.391382
Zm00001eb351230	14.983	11.5421	0.376419	0.0401473	0.461967
Zm00001eb234380	62.6726	44.7734	0.485194	0.00401938	0.100129
Zm00001eb269820	6.49564	4.1581	0.643548	0.0111162	0.20682
Zm00001eb225660	2.32454	1.50754	0.624743	0.0377024	0.445812
Zm00001eb250240	15.5092	10.4004	0.576485	0.00132867	0.0431806
Zm00001eb201810	0.699521	0.346581	1.01317	0.028283	0.380482
Zm00001eb396460	7.35899	5.46165	0.430172	0.0351663	0.432679
Zm00001eb321970	9.31196	6.16668	0.594591	0.00298102	0.0802227
Zm00001eb010450	19.9252	15.6433	0.349051	0.0104088	0.198912
Zm00001eb247050	6.50286	4.14005	0.651425	0.0170729	0.275848
Zm00001eb167810	7.27759	4.64464	0.647894	0.0333012	0.419447
Zm00001eb360960	49.8715	36.1078	0.465904	0.0363039	0.436898
Zm00001eb374720	11.3548	0.0001	16.7929	0.00275364	0.07585
Zm00001eb336660	79.8519	58.4782	0.449427	0.00848431	0.172579
Zm00001eb176480	1.8355	0.705405	1.37965	4.54157e-05	0.00280054
Zm00001eb425670	6.57349	4.55876	0.528018	0.0284593	0.381868
Zm00001eb107800	1.77526	0.561701	1.66016	0.0349435	0.431127
Zm00001eb236820	18.2502	11.8217	0.626473	0.0400458	0.461479
Zm00001eb309610	33.5	24.5306	0.449581	0.00070565	0.0265056
Zm00001eb403900	9.01512	5.08828	0.825168	0.00339435	0.0878485
Zm00001eb162680	3.78315	2.64165	0.518149	0.0198746	0.303992
Zm00001eb101070	0.102126	0.00618567	4.04528	0.0479375	0.507868
Zm00001eb315650	170.956	130.078	0.394243	0.0322425	0.410715
Zm00001eb163970	4.34175	2.94468	0.560165	0.0358232	0.434605
Zm00001eb127650	26.0013	19.6443	0.404476	0.0299028	0.393966
Zm00001eb384990	13.3157	7.65114	0.799385	0.000672557	0.0255647
Zm00001eb424710	1.04188	0.560801	0.893627	0.0268176	0.367891
Zm00001eb055210	11.3314	9.35093	0.277149	0.0358046	0.434567
Zm00001eb423590	15.1937	10.4209	0.543997	0.0379913	0.447199
Zm00001eb294750	6.87199	3.94101	0.802163	0.0394992	0.45856
Zm00001eb408600	3.30958	2.12539	0.638922	0.0106636	0.201929
Zm00001eb023650	5.20897	3.87024	0.428577	0.0339351	0.423701
Zm00001eb228410	1.93485	1.02241	0.920251	0.0391175	0.454804
Zm00001eb318610	2.48945	0.79493	1.64693	0.0342307	0.42548
Zm00001eb128470	7.24835	4.8462	0.580798	0.00992297	0.19281
Zm00001eb015220	0.55053	0.167596	1.71583	0.0231091	0.335264
Zm00001eb195530	5.43515	3.75008	0.535398	0.00571608	0.131017
Zm00001eb401380	1.06034	0.45721	1.2136	0.0265552	0.365898
Zm00001eb271490	16.991	13.3132	0.351917	0.00948571	0.185815
Zm00001eb248760	4.53678	2.92375	0.633849	0.0422691	0.476498
Zm00001eb071800	5.54678	3.73088	0.572133	0.0420994	0.475161
Zm00001eb073310	1.02445	0.582004	0.815754	0.0351932	0.432688
Zm00001eb304480	5.84936	3.35383	0.80247	0.0378711	0.446457
Zm00001eb089340	8.58277	4.84733	0.824251	0.0189412	0.295475
Zm00001eb026430	21.0915	12.7124	0.730426	0.000339737	0.0153048
Zm00001eb072640	7.14188	5.23753	0.447418	0.0412288	0.469402
Zm00001eb383330	46.3864	32.5902	0.509261	0.00129777	0.0425743
Zm00001eb074880	3.79271	2.36684	0.680267	0.035446	0.433053
Zm00001eb125220	8.14748	4.25483	0.937251	0.0139614	0.240358
Zm00001eb053110	0.26023	0.0416297	2.6441	0.0301673	0.396055
Zm00001eb238050	4.72847	3.16442	0.579434	0.0150551	0.254165
Zm00001eb197700	2.4666	1.54118	0.678487	0.0183227	0.288275
Zm00001eb124950	5.16211	2.91929	0.822346	0.0274452	0.37297
Zm00001eb158610	10.0986	6.07973	0.732081	0.0400816	0.461721
Zm00001eb241840	12.0343	8.53742	0.495281	0.0320977	0.410715
Zm00001eb254470	16.8873	8.98599	0.910189	0.0131767	0.231177
Zm00001eb340730	4.85177	3.66075	0.406371	0.0193368	0.298394
Zm00001eb330300	31.9161	21.3751	0.578352	0.00498427	0.118469
Zm00001eb152750	50.2813	37.4573	0.424776	0.0129277	0.228217
Zm00001eb029980	4.59124	2.49914	0.877449	0.0046018	0.111183
Zm00001eb000890	7.82717	6.07322	0.366029	0.0288978	0.3856
Zm00001eb199420	1.88301	0.070767	4.73382	0.00380816	0.0956291
Zm00001eb309310	15.2428	11.6109	0.392645	0.0284242	0.381714
Zm00001eb407890	5.34572	4.36287	0.293106	0.0252948	0.353466
Zm00001eb016040	9.73663	5.79532	0.748534	0.00132576	0.0431307
Zm00001eb334240	4.06712	3.2311	0.331981	0.0455697	0.496062
Zm00001eb335110	11.5204	9.01524	0.353754	0.0338117	0.422835
Zm00001eb010050	12.1483	7.79084	0.640908	0.0129818	0.228727
Zm00001eb062890	20.7257	13.6015	0.607652	0.00447129	0.108786
Zm00001eb016200	13.2322	6.94949	0.929071	0.000308799	0.0140733
Zm00001eb119570	16.823	13.0066	0.371187	0.031724	0.408829
Zm00001eb176800	6.57258	4.53632	0.534937	0.0484553	0.510497
Zm00001eb132670	3.2817	1.72948	0.924101	0.0305673	0.398488
Zm00001eb257750	2.31108	1.12264	1.04167	0.0285385	0.382705
Zm00001eb202420	23.219	16.758	0.47045	0.0174564	0.279159
Zm00001eb431980	1.4921	0.611255	1.2875	0.00350845	0.0898348
Zm00001eb138350	0.0788633	0.0001	9.62321	0.0446739	0.491049
Zm00001eb277900	6.86638	3.80232	0.852671	8.66284e-05	0.00478507
Zm00001eb081850	6.74872	4.17756	0.691953	0.00130526	0.0426416
Zm00001eb045010	9.16486	4.23616	1.11336	0.0109575	0.205381
Zm00001eb324670	27.1872	22.0983	0.298988	0.0372119	0.442354
Zm00001eb143620	0.744445	0.257737	1.53027	0.00843377	0.172393
Zm00001eb061880	11.8722	7.73721	0.617703	0.0112935	0.209042
Zm00001eb212110	0.371591	0.105813	1.8122	0.0151831	0.255114
Zm00001eb072940	3.25224	2.49135	0.384508	0.0288229	0.384934
Zm00001eb220480	65.2338	44.8243	0.541339	0.0124342	0.222519
Zm00001eb325880	145.645	113.674	0.357559	0.008929	0.179291
Zm00001eb326500	2.0618	1.13582	0.860168	0.0171744	0.276445
Zm00001eb131510	19.87	6.68145	1.57236	0.000142347	0.00731962
Zm00001eb058760	46.6972	39.3678	0.246321	0.0400986	0.461725
Zm00001eb019870	18.2009	13.8835	0.390639	0.0261025	0.361572
Zm00001eb111280	12.9126	9.8069	0.396909	0.0389387	0.4534
Zm00001eb362070	5.00247	2.9301	0.771689	0.011622	0.212185
Zm00001eb324000	6.90255	4.38552	0.65438	0.00218018	0.0630537
Zm00001eb280690	4.53019	2.04154	1.14991	0.000235722	0.0112
Zm00001eb266430	1.77306	0.183044	3.27598	0.000723431	0.0269897
Zm00001eb153760	216.813	113.573	0.932827	0.004691	0.113076
Zm00001eb283580	0.5871	0.0251653	4.5441	0.000291393	0.0132994
Zm00001eb155680	40.5273	29.2676	0.46959	0.036028	0.435905
Zm00001eb287630	5.50257	3.48982	0.656952	0.0130353	0.229339
Zm00001eb007900	0.70177	0.232773	1.59208	0.0162985	0.267723
Zm00001eb102840	4.35845	2.85439	0.610631	0.00752212	0.159547
Zm00001eb361780	11.5364	5.81578	0.988154	0.00892271	0.17928
Zm00001eb240600	0.291442	0.0001	11.509	0.0451066	0.493426
Zm00001eb020870	15.9663	12.4813	0.355258	0.0311783	0.40375
Zm00001eb321960	2.85426	0.715594	1.9959	0.016269	0.267471
Zm00001eb304180	1.46152	0.349466	2.06424	0.00524238	0.122954
Zm00001eb263160	17.2963	10.6101	0.705031	0.00778146	0.162826
Zm00001eb395600	107.295	75.1157	0.514401	0.046912	0.50366
Zm00001eb283770	4.11885	2.90165	0.505367	0.0285927	0.38308
Zm00001eb325970	13.5407	8.94071	0.598844	0.00679748	0.148821
Zm00001eb069210	10.1676	6.69477	0.602872	0.00763519	0.160927
Zm00001eb144580	59.3184	49.6534	0.256585	0.0483282	0.510419
Zm00001eb416500	0.324513	0.0357593	3.18188	0.0335528	0.420915
Zm00001eb404440	0.893477	0.274746	1.70133	0.0469798	0.503933
Zm00001eb350640	8.6945	3.68128	1.2399	1.20923e-05	0.000905961
Zm00001eb430650	2.23442	1.4823	0.592061	0.0487691	0.511608
Zm00001eb218560	429.079	292.728	0.551683	0.0044388	0.108181
Zm00001eb255490	6.47745	4.3812	0.564103	0.0316792	0.40842
Zm00001eb327040	1.45556	0.63252	1.20239	0.0407917	0.466634
Zm00001eb150450	29.7926	20.5391	0.536581	0.0220652	0.327407
Zm00001eb126760	15.9338	10.4288	0.611512	0.0165422	0.269784
Zm00001eb284750	11.4764	6.68318	0.780065	0.000215423	0.0104581
Zm00001eb158930	0.680415	0.324983	1.06605	0.0264114	0.36472
Zm00001eb302920	44.5425	35.5262	0.326299	0.0402166	0.462284
Zm00001eb399120	13.3979	8.58259	0.642517	0.0166152	0.27027
Zm00001eb079210	8.85122	6.71274	0.398974	0.027014	0.368968
Zm00001eb100860	11.862	7.45745	0.669587	0.0292942	0.389063
Zm00001eb193040	61.5094	47.4064	0.375726	0.0249147	0.350555
Zm00001eb125190	5.66514	3.6359	0.639797	0.0102785	0.197387
Zm00001eb074690	0.871296	0.30573	1.51091	0.0270638	0.369325
Zm00001eb000840	50.2217	34.3408	0.548388	0.0419717	0.474404
Zm00001eb366200	2.04471	1.0239	0.997826	0.00319197	0.0842536
Zm00001eb066640	40.9794	34.1556	0.262776	0.0301062	0.395812
Zm00001eb363310	36.0211	27.9351	0.366765	0.0127911	0.226316
Zm00001eb288380	3.01061	2.00426	0.586991	0.0266829	0.366848
Zm00001eb118360	0.99091	0.182935	2.43743	0.00286645	0.0781996
Zm00001eb320350	6.36378	3.81329	0.738845	0.000758655	0.0280361
Zm00001eb380390	7.18677	5.34487	0.42719	0.039723	0.459793
Zm00001eb325650	185.634	137.04	0.437859	0.00735035	0.156647
Zm00001eb202130	12.2865	9.01502	0.446672	0.00304948	0.0815559
Zm00001eb393300	14.6953	11.7565	0.321896	0.0386565	0.451574
Zm00001eb356480	27.3092	17.0969	0.675652	0.00102759	0.0353429
Zm00001eb227560	3.38704	2.39847	0.497912	0.0461783	0.499903
Zm00001eb315870	35.3559	28.9123	0.290267	0.0282724	0.380482
Zm00001eb160330	28.4619	22.4804	0.340362	0.0250762	0.351342
Zm00001eb199700	29.1653	19.1984	0.603268	0.00299613	0.0804734
Zm00001eb243690	21.0334	15.4848	0.44183	0.0217538	0.324825
Zm00001eb092180	6.52297	4.62497	0.496084	0.00646944	0.143549
Zm00001eb122560	6.56789	4.67103	0.491687	0.0289996	0.386588
Zm00001eb263200	4.17306	2.95581	0.497553	0.0102249	0.196626
Zm00001eb219670	1.30916	0.762544	0.779747	0.0370843	0.441846
Zm00001eb205790	14.4697	10.5552	0.455086	0.0275989	0.374177
Zm00001eb241100	6.74925	4.27783	0.657847	0.0103863	0.198605
Zm00001eb316620	11.6564	7.70588	0.597088	0.0226888	0.331954
Zm00001eb001530	148.156	114.362	0.373509	0.0180156	0.285054
Zm00001eb103500	170.64	115.227	0.566477	0.00334302	0.0870244
Zm00001eb384240	2.98581	1.6969	0.815221	0.00455069	0.110204
Zm00001eb099390	4.23646	2.93822	0.527916	0.0498712	0.516625
Zm00001eb188690	8.67683	6.14555	0.497626	0.0302978	0.396595
Zm00001eb177120	5.84846	3.46065	0.757013	0.0098902	0.192533
Zm00001eb143540	77.0343	52.6023	0.550375	0.049611	0.515689
Zm00001eb274280	45.5602	36.2479	0.329878	0.0265221	0.365828
Zm00001eb107870	79.9037	58.8697	0.440737	0.0126209	0.224595
Zm00001eb227730	10.3261	7.81301	0.40235	0.0321975	0.410715
Zm00001eb251710	17.5286	11.5312	0.604177	0.00248886	0.0700374
Zm00001eb109970	3.08263	2.04198	0.594195	0.0395273	0.458666
Zm00001eb173930	18.5096	11.7547	0.65503	0.0391472	0.454811
Zm00001eb406350	110.333	92.5676	0.253285	0.0352801	0.432718
Zm00001eb294890	51.107	30.0553	0.765901	0.0116016	0.212185
Zm00001eb324160	16.0537	7.74074	1.05236	0.00452974	0.109866
Zm00001eb053460	5.44495	4.53514	0.263771	0.0390414	0.454257
Zm00001eb127940	11.3185	8.58096	0.399473	0.0181841	0.286691
Zm00001eb042090	2.14514	1.48565	0.529974	0.0372052	0.442354
Zm00001eb081750	1.26243	0.401599	1.65238	0.0193141	0.298338
Zm00001eb256100	6.09745	4.07421	0.581686	0.0372872	0.442745
Zm00001eb001390	39.8812	30.0927	0.406296	0.0234389	0.337849
Zm00001eb134240	9.91512	7.0411	0.49383	0.0240722	0.343492
Zm00001eb181120	5.25141	4.19749	0.323178	0.0191775	0.297433
Zm00001eb049830	3.41062	2.35978	0.531382	0.0091367	0.18148
Zm00001eb174940	0.418265	0.0431953	3.27547	0.0188023	0.294616
Zm00001eb231180	8.9471	6.56654	0.446287	0.0168754	0.273365
Zm00001eb148680	7.26179	5.37214	0.434827	0.0243587	0.345845
Zm00001eb112850	8.64071	5.89706	0.551155	0.0203542	0.309536
Zm00001eb016420	38.1695	29.8495	0.354716	0.0176278	0.280895
Zm00001eb157610	2.86196	1.52718	0.906129	0.00211282	0.061621
Zm00001eb190230	0.329749	0.033442	3.30164	0.0275937	0.374177
Zm00001eb023700	3.35156	1.97584	0.762365	0.0463495	0.501236
Zm00001eb363950	30.7532	23.5388	0.385697	0.00442706	0.108066
Zm00001eb425680	9.12197	6.35326	0.521848	0.0233942	0.337515
Zm00001eb431850	75.7163	53.1403	0.510797	0.0372007	0.442354
Zm00001eb307250	5.82268	2.85488	1.02825	0.000352094	0.0157031
Zm00001eb022540	32.4704	18.6879	0.797018	0.00183908	0.0556064
Zm00001eb108290	4.17334	2.80548	0.572954	0.0340609	0.424739
Zm00001eb374600	10.3119	7.8591	0.391873	0.0468003	0.502978
Zm00001eb295140	4.89743	1.98661	1.30172	0.000728705	0.0270895
Zm00001eb367160	13.1719	8.4265	0.64446	0.00847966	0.172579
Zm00001eb422140	16.9494	11.2667	0.589162	0.0140188	0.241081
Zm00001eb073370	12.47	8.13124	0.61692	0.000508611	0.0207944
Zm00001eb143420	2.11284	1.47754	0.515985	0.0370099	0.441296
Zm00001eb083390	8.60107	4.19121	1.03715	0.00692736	0.15082
Zm00001eb251090	1.96095	1.10868	0.822709	0.0317518	0.409019
Zm00001eb079770	3.42597	1.42118	1.26943	0.0363553	0.436898
Zm00001eb042000	7.83717	6.00738	0.383597	0.0363357	0.436898
Zm00001eb350770	44.1884	30.6636	0.527139	0.011947	0.215675
Zm00001eb104060	5.92405	4.49429	0.39849	0.0207617	0.313723
Zm00001eb324480	53.455	43.0181	0.313383	0.0134089	0.233787
Zm00001eb158150	12.7385	8.97788	0.504744	0.00345631	0.0888636
Zm00001eb334130	13.8531	10.5506	0.392872	0.0310641	0.402741
Zm00001eb087230	60.0585	47.8781	0.327005	0.0288233	0.384934
Zm00001eb160010	572.319	437.264	0.388313	0.0146553	0.249149
Zm00001eb243550	4.21072	2.47759	0.765128	0.00400025	0.099732
Zm00001eb063450	3.72429	2.61386	0.510781	0.045548	0.495999
Zm00001eb172950	24.5796	17.3377	0.503553	0.0100787	0.194747
Zm00001eb032300	12.3267	6.08894	1.01753	0.00138837	0.0445647
Zm00001eb139160	6.33719	3.69386	0.778714	0.0102725	0.197387
Zm00001eb292740	13.5903	8.00792	0.763077	0.00123048	0.040969
Zm00001eb105640	1.47101	0.796545	0.884984	0.033534	0.420915
Zm00001eb366940	1.29429	0.240542	2.42779	0.00221076	0.0638793
Zm00001eb431170	17.7208	11.6411	0.606221	0.00190796	0.0571912
Zm00001eb050230	1.21333	0.643405	0.915177	0.0240247	0.343257
Zm00001eb299120	3.95623	2.43595	0.699642	0.0379383	0.446912
Zm00001eb400760	14.7251	11.3698	0.373069	0.0495932	0.515689
Zm00001eb127040	85.6472	69.155	0.308573	0.024131	0.344176
Zm00001eb244070	2.33079	1.47919	0.65601	0.0364297	0.436898
Zm00001eb082180	2.95662	1.25148	1.24031	0.0116223	0.212185
Zm00001eb026010	9.92154	7.55011	0.394068	0.0197791	0.303151
Zm00001eb232740	4.06604	2.25301	0.851773	0.021645	0.323739
Zm00001eb084720	2.70447	1.37152	0.979572	0.0219119	0.32621
Zm00001eb320220	0.802087	0.206618	1.95679	0.0329478	0.417646
Zm00001eb140020	79.674	50.5754	0.655675	0.0110168	0.205998
Zm00001eb138190	28.8292	22.5465	0.354627	0.0374728	0.444105
Zm00001eb117560	5.52762	3.81824	0.533749	0.00691224	0.150595
Zm00001eb021400	2.72586	1.72085	0.663589	0.00491616	0.117327
Zm00001eb151620	3.44229	2.33773	0.55826	0.000909157	0.0323646
Zm00001eb428330	1.57182	0.775194	1.01981	0.00257962	0.0720876
Zm00001eb181000	6.94517	4.55836	0.607495	0.0330811	0.418555
Zm00001eb361520	15.8466	12.2377	0.372836	0.00290755	0.079045
Zm00001eb281860	0.771544	0.08651	3.15681	0.000374358	0.0165543
Zm00001eb144880	3.09297	2.07902	0.573093	0.0408328	0.466822
Zm00001eb036580	38.6352	32.3704	0.255238	0.0386429	0.451574
Zm00001eb198240	8.60117	5.85802	0.554119	0.0226657	0.331954
Zm00001eb347470	12.2611	8.57454	0.515952	0.0406737	0.465975
Zm00001eb073440	11.6766	6.71493	0.798179	0.00237256	0.0675943
Zm00001eb043900	4.37794	2.71105	0.691401	0.0353118	0.432767
Zm00001eb104470	10.7943	1.44688	2.89925	4.14061e-09	7.61482e-07
Zm00001eb048860	4.56035	2.97323	0.617113	0.00910581	0.181097
Zm00001eb200470	5.69968	4.08014	0.482262	0.0404868	0.464166
Zm00001eb005030	22.5068	17.9091	0.329667	0.0136626	0.236909
Zm00001eb430910	4.40939	2.14968	1.03646	0.00065352	0.0249167
Zm00001eb130750	42.8732	32.9952	0.377821	0.035913	0.435019
Zm00001eb067270	2.53098	1.51753	0.737972	0.0110713	0.206472
Zm00001eb304130	8.0645	5.15654	0.645181	0.0126047	0.224595
Zm00001eb050140	45.2095	33.183	0.446182	0.0188093	0.294616
Zm00001eb056890	83.4746	69.8378	0.25733	0.0478179	0.507461
Zm00001eb148440	0.146133	0.0001	10.5131	0.0133217	0.232805
Zm00001eb396300	28.7961	21.3805	0.429581	0.0318741	0.409643
Zm00001eb152670	12.8858	7.92148	0.701945	0.00419755	0.103577
Zm00001eb217930	9.98326	6.73943	0.566885	0.00283568	0.0776991
Zm00001eb177940	12.4106	10.1536	0.289579	0.0333127	0.419447
Zm00001eb092850	7.68664	4.49658	0.773524	0.000248126	0.0116828
Zm00001eb423880	56.2627	44.8626	0.326664	0.0471087	0.504731
Zm00001eb026490	23.748	14.6912	0.692856	0.000634251	0.0243962
Zm00001eb343680	257.662	197.18	0.38597	0.0306844	0.399256
Zm00001eb064730	13.1418	9.81906	0.420504	0.0386428	0.451574
Zm00001eb206050	0.740933	0.435543	0.766528	0.0459513	0.498308
Zm00001eb188460	2.63065	1.42877	0.880644	0.00812915	0.1682
Zm00001eb405340	6.2149	3.70975	0.744407	0.00856959	0.173711
Zm00001eb015190	2.58784	1.48938	0.797035	0.0110558	0.206472
Zm00001eb413710	8.72354	6.22201	0.487532	0.0356827	0.434248
Zm00001eb188280	2.41968	1.45886	0.729971	0.015761	0.261878
Zm00001eb257600	0.124807	0.008276	3.91462	0.0165915	0.270165
Zm00001eb013920	9.01999	5.91584	0.608543	0.0279071	0.376994
Zm00001eb368310	8.03403	5.20092	0.627357	0.01193	0.215596
Zm00001eb216120	9.00787	6.69659	0.427759	0.0118902	0.215507
Zm00001eb327030	60.6076	45.4513	0.415176	0.0352709	0.432718
Zm00001eb327690	8.00474	6.11761	0.387886	0.0447097	0.491147
Zm00001eb097070	21.9171	14.8348	0.563075	0.0357435	0.434312
Zm00001eb047490	19.1651	12.4611	0.621046	0.0357323	0.434312
Zm00001eb011460	5.31416	3.84138	0.468218	0.0223271	0.329107
Zm00001eb393450	44.5765	33.9001	0.394995	0.00831077	0.171277
Zm00001eb254560	2.24256	1.33758	0.74552	0.0258763	0.359395
Zm00001eb080890	88.7657	54.8791	0.693746	0.00986457	0.192153
Zm00001eb154260	2.53326	1.62904	0.636973	0.0158859	0.263049
Zm00001eb227490	0.731177	0.0001	12.836	0.0467764	0.502919
Zm00001eb031670	22.452	16.8651	0.412801	0.0299914	0.394635
Zm00001eb037060	0.315737	0.0001	11.6245	0.0296821	0.392215
Zm00001eb268080	11.7334	8.91936	0.395612	0.0363929	0.436898
Zm00001eb035990	126.742	95.6212	0.406494	0.0436061	0.485506
Zm00001eb159110	10.37	6.98489	0.570113	0.00503078	0.118883
Zm00001eb068880	16.4807	12.2175	0.431832	0.00995056	0.193106
Zm00001eb085190	2.0518	1.09176	0.910242	0.029032	0.38673
Zm00001eb387520	14.8384	10.0257	0.565639	0.0205455	0.31151
Zm00001eb332010	4.43257	3.0577	0.535696	0.0371653	0.442354
Zm00001eb333170	6.9578	4.4005	0.660965	0.00113776	0.0382494
Zm00001eb261720	4.32972	2.79119	0.633394	0.00615412	0.138519
Zm00001eb325360	32.3855	26.8839	0.268608	0.0466852	0.502814
Zm00001eb010180	11.6791	8.67224	0.429453	0.0460539	0.498902
Zm00001eb007140	11.4595	8.36361	0.454343	0.00917896	0.181973
Zm00001eb321000	17.829	12.0014	0.571019	0.0178818	0.28376
Zm00001eb106750	6.34814	4.22157	0.588554	0.0208132	0.314197
Zm00001eb177320	2.36173	1.02079	1.21016	0.0319777	0.41007
Zm00001eb080560	6.18572	4.145	0.577571	0.0105067	0.200171
Zm00001eb174000	13.7146	8.7082	0.65527	0.0089598	0.179703
Zm00001eb023070	794.705	551.164	0.527937	0.0364026	0.436898
Zm00001eb252230	12.5142	7.35917	0.765955	0.00227721	0.0654965
Zm00001eb121060	9.80538	5.48146	0.839014	0.000633573	0.0243962
Zm00001eb042450	35.1504	27.1297	0.373666	0.0165232	0.269615
Zm00001eb100570	5.10826	3.01314	0.761563	0.00236948	0.0675908
Zm00001eb312290	19.621	14.0336	0.483515	0.0166063	0.270265
Zm00001eb322390	54.7331	46.6701	0.229913	0.0407177	0.465975
Zm00001eb266260	71.2403	45.2907	0.653478	0.00406546	0.101036
Zm00001eb050930	15.4503	10.2194	0.596324	0.000204973	0.0100443
Zm00001eb149530	12.9699	8.65162	0.584128	0.036661	0.439145
Zm00001eb091750	4.6897	3.35728	0.482199	0.013225	0.231763
Zm00001eb243290	6.00486	3.99768	0.586967	0.0222905	0.328766
Zm00001eb348850	10.9371	6.59348	0.730113	0.00561626	0.129393
Zm00001eb031290	22.9048	15.7595	0.539429	0.00658066	0.145127
Zm00001eb200270	52.2383	28.0548	0.896858	0.0313132	0.404976
Zm00001eb298980	54.6899	38.7428	0.497347	0.000528952	0.0213383
Zm00001eb399440	0.620581	0.194364	1.67486	0.00443948	0.108181
Zm00001eb019300	2.09702	1.04685	1.00229	0.00657046	0.145127
Zm00001eb264400	3.22185	1.69965	0.922654	0.00764929	0.160934
Zm00001eb060390	6.0635	4.28318	0.501469	0.00765681	0.160983
Zm00001eb234770	1.46411	0.710095	1.04394	0.00993432	0.192911
Zm00001eb302320	9.99891	6.29008	0.668694	0.000349071	0.0156352
Zm00001eb405790	2.40505	0.639982	1.90996	0.00867928	0.175177
Zm00001eb264870	8.72225	5.07084	0.782475	0.0163165	0.267723
Zm00001eb386230	10.0704	7.39172	0.446146	0.0426875	0.479204
Zm00001eb358400	52.7182	24.2236	1.12189	0.000219838	0.0106103
Zm00001eb216190	0.794103	0.250308	1.66562	0.000848983	0.0307206
Zm00001eb206700	31.8074	25.7534	0.304599	0.0489089	0.51201
Zm00001eb407050	4.28318	2.68884	0.671697	0.0403785	0.463093
Zm00001eb057470	61.7574	41.9952	0.556387	3.61458e-05	0.00228758
Zm00001eb196160	26.2968	20.6824	0.34648	0.0248029	0.349769
Zm00001eb422800	33.4181	21.3606	0.645678	0.00155917	0.048937
Zm00001eb347200	108.671	83.0489	0.387934	0.0416336	0.471448
Zm00001eb418150	16.9833	8.69719	0.965493	3.38107e-08	5.00975e-06
Zm00001eb214620	0.365607	0.0001	11.8361	0.0282823	0.380482
Zm00001eb387610	9.01713	4.09768	1.13786	0.00559036	0.128987
Zm00001eb417390	1.81167	1.02853	0.816733	0.0350721	0.432202
Zm00001eb036510	6.0897	3.95753	0.621771	0.0226762	0.331954
Zm00001eb393550	0.408941	0.0001	11.9977	0.0160574	0.265057
Zm00001eb293200	39.0445	22.0319	0.825524	0.000260959	0.0121771
Zm00001eb250060	5.51036	2.31669	1.25008	0.000586763	0.0230459
Zm00001eb431660	6.8401	5.14109	0.411943	0.00973952	0.190191
Zm00001eb402630	30.3373	20.802	0.544374	0.0129859	0.228727
Zm00001eb033340	7.64575	5.7287	0.41645	0.0440239	0.487134
Zm00001eb100110	6.5537	4.87205	0.42778	0.0152371	0.255291
Zm00001eb218310	6.2701	3.8607	0.699624	0.0423252	0.476591
Zm00001eb282320	178.856	139.277	0.360842	0.0367941	0.439862
Zm00001eb389060	20.4882	14.2623	0.522585	0.000630521	0.0243915
Zm00001eb370130	10.2402	7.76951	0.398354	0.0304294	0.397388
Zm00001eb121390	9.7303	7.55474	0.365103	0.0285462	0.382705
Zm00001eb145900	6.47539	4.32417	0.582543	0.0193127	0.298338
Zm00001eb159780	8.38941	6.68114	0.328474	0.0262736	0.363298
Zm00001eb252220	3.07565	2.15225	0.515044	0.0382664	0.449759
Zm00001eb134790	2.85637	1.97479	0.53249	0.021405	0.320655
Zm00001eb272150	6.43651	4.13419	0.638672	0.0440289	0.487134
Zm00001eb160060	14.1617	9.50154	0.575762	0.0230774	0.335264
Zm00001eb215030	10.9534	8.26832	0.405712	0.0220027	0.32679
Zm00001eb137850	16.1636	9.16235	0.81896	0.00404039	0.100492
Zm00001eb304940	94.8834	65.9057	0.525752	0.0402329	0.462284
Zm00001eb370670	70.8464	41.5811	0.768767	0.00684594	0.149375
Zm00001eb313160	0.89254	0.513128	0.798599	0.0271978	0.370506
Zm00001eb079370	10.5052	5.70081	0.881859	0.0375716	0.444771
Zm00001eb153550	3.52568	2.29169	0.621488	0.0220027	0.32679
Zm00001eb106060	4.92188	3.63778	0.43615	0.0213662	0.320534
Zm00001eb430810	24.7718	17.7573	0.480287	0.00153145	0.0482655
Zm00001eb001690	20.3384	13.0596	0.639091	0.000425904	0.0180916
Zm00001eb407240	21.9474	17.9784	0.287789	0.0224744	0.330343
Zm00001eb365610	11.3077	7.58402	0.57627	1.99504e-06	0.00018345
Zm00001eb052300	10.8147	8.03814	0.428064	0.0170449	0.275538
Zm00001eb241740	4.33543	1.99843	1.11731	0.00189223	0.0570038
Zm00001eb274250	2.99657	1.91341	0.647168	0.0406765	0.465975
Zm00001eb294360	5.34603	3.73717	0.516524	0.0098265	0.19165
Zm00001eb117610	8.81616	6.77853	0.379177	0.0344117	0.426416
Zm00001eb348750	6.50249	4.63064	0.48978	0.0259738	0.360108
Zm00001eb142140	8.6863	4.10705	1.08064	0.0234248	0.337801
Zm00001eb410410	13.1414	9.32707	0.494618	0.0109214	0.205196
Zm00001eb389410	0.232931	0.0201387	3.53186	0.0172079	0.276743
Zm00001eb088950	32.6911	22.4683	0.541008	0.00716466	0.153949
Zm00001eb260920	28.5452	21.8743	0.384009	0.0110924	0.206669
Zm00001eb148750	9.60064	7.41403	0.372873	0.0318723	0.409643
Zm00001eb140560	4.84668	3.18887	0.603951	0.0335718	0.420915
Zm00001eb388080	22.8358	17.698	0.367714	0.0301913	0.396055
Zm00001eb377780	151.063	107.769	0.487204	0.0441535	0.487453
Zm00001eb330200	1.35206	0.654076	1.04763	0.0364315	0.436898
Zm00001eb073660	26.6462	18.4872	0.527405	0.00389027	0.0974562
Zm00001eb259460	11.049	8.02088	0.462078	0.0102077	0.196511
Zm00001eb008720	13.894	11.0018	0.33672	0.025463	0.354441
Zm00001eb294870	724.49	535.294	0.436635	0.0218463	0.325453
Zm00001eb403500	0.543497	0.188223	1.52983	0.0246816	0.34853
Zm00001eb209450	14.5884	9.62781	0.599544	0.00359863	0.0913952
Zm00001eb368840	28.231	19.5576	0.529556	0.0269547	0.368658
Zm00001eb046210	12.3855	9.90404	0.322567	0.0286873	0.38366
Zm00001eb017810	9.97996	7.78025	0.359218	0.0230753	0.335264
Zm00001eb326490	9.96239	6.99625	0.50991	0.033735	0.422214
Zm00001eb003820	2677.36	1848.59	0.534388	0.0188913	0.295161
Zm00001eb283750	19.1173	12.9298	0.56418	0.0121901	0.219534
Zm00001eb374500	32.6218	23.9545	0.445538	0.0293811	0.389616
Zm00001eb249980	29.8013	20.5137	0.538786	0.0402693	0.462284
Zm00001eb434380	0.389321	0.046079	3.07878	0.0294335	0.389919
Zm00001eb026690	129.832	89.2674	0.540446	0.015362	0.256696
Zm00001eb420410	3.05581	1.74874	0.805235	0.000677685	0.0256503
Zm00001eb405800	5.86114	3.34398	0.809618	0.00215564	0.0625002
Zm00001eb414490	0.789639	0.395761	0.996563	0.0228001	0.333094
Zm00001eb187010	481.176	398.677	0.271344	0.0454884	0.495637
Zm00001eb403330	2.1371	1.03211	1.05007	0.00764385	0.160927
Zm00001eb196530	10.0818	7.15688	0.494355	0.00659798	0.145369
Zm00001eb052790	690.335	532.784	0.373747	0.0181667	0.286561
Zm00001eb136220	3.165	1.65417	0.936102	0.00159295	0.0495691
Zm00001eb170390	8.96009	6.10393	0.553775	0.0235187	0.338251
Zm00001eb176490	3.4235	1.39516	1.29504	1.20288e-07	1.5455e-05
Zm00001eb297350	9.96644	5.7358	0.797085	0.0117257	0.213383
Zm00001eb296080	9.85145	6.81372	0.531893	0.0192842	0.298338
Zm00001eb061980	1.42351	0.471642	1.59369	0.0239181	0.342431
Zm00001eb065350	0.295241	0.063699	2.21255	0.0349243	0.431059
Zm00001eb197760	1.46989	0.85619	0.779701	0.0253448	0.353583
Zm00001eb393420	28.8902	19.9979	0.530733	0.0158919	0.263049
Zm00001eb312830	15.961	10.9224	0.547251	0.0447849	0.491628
Zm00001eb396880	7.49728	5.93827	0.336325	0.0457581	0.497247
Zm00001eb400670	17.0039	13.3079	0.353583	0.00375831	0.0949877
Zm00001eb021530	9.8137	7.3099	0.424945	0.0180007	0.285054
Zm00001eb275620	16.4725	12.7908	0.364951	0.0356664	0.434219
Zm00001eb023360	161.82	118.401	0.450715	0.0235792	0.338933
Zm00001eb375340	7.65878	3.69598	1.05116	0.00472335	0.1137
Zm00001eb431930	66.1557	48.3659	0.451876	0.00932897	0.183906
Zm00001eb303970	0.129477	0.0001	10.3385	0.0286109	0.38308
Zm00001eb177880	31.102	20.7109	0.586617	0.000583363	0.0229701
Zm00001eb390740	0.259981	0.0001	11.3442	0.0138085	0.238645
Zm00001eb055220	22.1138	17.0898	0.371807	0.038779	0.452215
Zm00001eb296770	0.522095	0.0782037	2.739	0.0127632	0.226158
Zm00001eb204050	3.9344	2.44028	0.689097	0.00925171	0.18272
Zm00001eb215800	7.01255	4.39254	0.674883	0.036827	0.439954
Zm00001eb065140	9.83081	8.00381	0.296624	0.0302011	0.396055
Zm00001eb360520	13.3835	10.137	0.400826	0.0331038	0.418672
Zm00001eb235330	41.4514	26.7816	0.630181	0.0354433	0.433053
Zm00001eb154280	0.780975	0.388275	1.0082	0.0363408	0.436898
Zm00001eb422090	5.90367	3.51735	0.747123	0.00212576	0.0619383
Zm00001eb297430	8.20774	5.1772	0.664813	0.0104478	0.199416
Zm00001eb073500	1.68164	0.861094	0.965628	0.0100384	0.19412
Zm00001eb192380	3.11738	1.6242	0.940609	0.000394427	0.0171507
Zm00001eb125230	4.8158	3.49099	0.46414	0.00712026	0.153472
Zm00001eb181800	11.906	8.20338	0.537392	0.0423869	0.476685
Zm00001eb255340	14.0712	11.1038	0.341694	0.0162498	0.267387
Zm00001eb326590	11.6913	8.61085	0.441214	0.0326266	0.414481
Zm00001eb052470	13.9429	9.25133	0.591794	4.41643e-05	0.00273417
Zm00001eb124960	5.2935	2.81335	0.911931	0.0496846	0.515888
Zm00001eb231360	72.5363	55.817	0.377999	0.0335643	0.420915
Zm00001eb236850	260.786	164.621	0.66372	0.0348878	0.430779
Zm00001eb019680	17.2034	11.5846	0.570488	0.0242151	0.344745
Zm00001eb351300	9.45104	6.51839	0.535959	0.025083	0.351342
Zm00001eb230930	35.1458	23.016	0.610716	0.0269101	0.368475
Zm00001eb078890	8.87805	5.95331	0.576553	0.00630259	0.14067
Zm00001eb283300	0.114129	0.00688367	4.05134	0.0244935	0.346765
Zm00001eb029990	24.9082	18.7336	0.41099	0.00843348	0.172393
Zm00001eb256330	70.8487	52.9735	0.419469	0.0450037	0.493164
Zm00001eb002010	4.3632	3.3811	0.367895	0.0434565	0.48453
Zm00001eb432030	1.25664	0.62282	1.01268	0.0328305	0.416733
Zm00001eb126880	15.4844	12.5393	0.304356	0.0409472	0.467387
Zm00001eb370700	20.6407	14.2263	0.536935	0.00145642	0.0462268
Zm00001eb429690	0.717556	0.102034	2.81404	0.0073219	0.156254
Zm00001eb144140	0.653529	0.297446	1.13562	0.0126507	0.224595
Zm00001eb215260	3.08653	1.79883	0.778925	0.0148175	0.251405
Zm00001eb112670	2.24982	1.13985	0.98097	0.00631268	0.14067
Zm00001eb200280	36.1588	20.9782	0.785451	0.04535	0.494996
Zm00001eb312000	8.8206	5.14631	0.77734	0.00127672	0.0421938
Zm00001eb246400	36.3324	29.0367	0.32338	0.0440483	0.487134
Zm00001eb207740	4.88541	3.20976	0.606014	0.0490644	0.513083
Zm00001eb389050	6.04915	3.39078	0.835113	0.0328702	0.416898
Zm00001eb206560	10.0279	7.59445	0.401003	0.0482842	0.510331
Zm00001eb321230	1.36213	0.667844	1.02828	0.0424327	0.476858
Zm00001eb301520	81.4056	58.915	0.466494	0.0435864	0.48546
Zm00001eb389400	15.3348	7.98634	0.941208	8.33466e-06	0.000659683
Zm00001eb324660	12.4446	3.07933	2.01483	4.64499e-25	7.26105e-21
Zm00001eb085330	78.3931	56.3747	0.475679	0.0245815	0.347441
Zm00001eb143630	23.4008	14.8337	0.657676	0.000222333	0.0107079
Zm00001eb294480	26.685	16.2352	0.716901	0.00319347	0.0842536
Zm00001eb314970	11.1681	7.68522	0.539226	0.0196894	0.302493
Zm00001eb059050	14.3689	10.5344	0.447841	0.00380585	0.0956291
Zm00001eb028330	0.633685	0.224733	1.49555	0.0310405	0.402715
Zm00001eb357380	13.2007	7.85128	0.749609	0.0060154	0.136279
Zm00001eb157630	2.40541	0.959611	1.32576	0.0272422	0.370949
Zm00001eb310500	3.30224	2.24546	0.556434	0.0375028	0.444292
Zm00001eb153210	0.364244	0.014774	4.62377	0.00921039	0.182249
Zm00001eb007230	8.51825	6.51222	0.387407	0.0344985	0.427153
Zm00001eb382380	5.98521	2.98385	1.00423	1.574e-05	0.00113386
Zm00001eb099990	1.76515	0.914003	0.949522	0.0229284	0.334188
Zm00001eb432400	5.23138	3.10035	0.75476	0.0494169	0.514732
Zm00001eb295440	17.4549	12.3661	0.497239	0.0399099	0.461121
Zm00001eb082830	4.05053	3.12084	0.376178	0.0476249	0.507134
Zm00001eb270390	47.6465	37.5547	0.343378	0.0114888	0.211188
Zm00001eb142820	6.30002	4.76114	0.40405	0.0269071	0.368475
Zm00001eb222610	6.098	3.23585	0.91419	8.43106e-05	0.00467356
Zm00001eb258860	11.8029	9.68696	0.285026	0.0150324	0.254165
Zm00001eb303120	11.0784	7.26396	0.60892	0.0220866	0.327426
Zm00001eb152020	10.4444	7.43837	0.489671	0.00169668	0.0521641
Zm00001eb153770	4.6567	3.34574	0.476985	0.0305402	0.398488
Zm00001eb409540	12.287	7.21417	0.768229	0.00128385	0.0423401
Zm00001eb178680	2.72111	1.84287	0.562241	0.0213814	0.320609
Zm00001eb125170	12.2421	7.77663	0.654631	0.000350376	0.0156488
Zm00001eb358960	18.2365	12.1823	0.582047	0.00764178	0.160927
Zm00001eb031130	4.20265	2.90373	0.533394	0.0211671	0.318311
Zm00001eb306770	0.380762	0.0001	11.8947	0.0051243	0.120728
Zm00001eb263170	6.46561	3.70829	0.802031	0.036373	0.436898
Zm00001eb108370	2.10379	1.50299	0.485158	0.0395377	0.458666
Zm00001eb351800	2.27317	1.24683	0.866442	0.0224636	0.330343
Zm00001eb430160	6.68209	4.81739	0.472047	0.0107321	0.202614
Zm00001eb312080	99.0728	67.7077	0.54917	0.0338607	0.423245
Zm00001eb155970	0.574419	0.0001	12.4879	0.0111203	0.20682
Zm00001eb049330	11.9461	8.91501	0.422234	0.00379629	0.0954845
Zm00001eb092870	24.2036	18.2092	0.410554	0.0379554	0.446944
Zm00001eb311740	15.3215	11.934	0.360486	0.0322513	0.410715
Zm00001eb023730	7.95411	6.00162	0.406348	0.0133778	0.233394
Zm00001eb213700	7.72808	4.42476	0.804512	0.000983047	0.0342249
Zm00001eb173590	1.26544	0.528886	1.25861	0.0332811	0.419447
Zm00001eb238930	168.809	130.995	0.36588	0.00438864	0.10736
Zm00001eb124210	157.176	116.217	0.435564	0.0350938	0.432298
Zm00001eb140620	24.0991	18.1823	0.406441	0.012948	0.228447
Zm00001eb153500	111.576	91.001	0.294076	0.0367934	0.439862
Zm00001eb078470	21.4575	15.3278	0.485332	0.0050014	0.118548
Zm00001eb222810	3.18211	1.40203	1.18247	0.000978409	0.0341395
Zm00001eb136110	19.1452	9.22825	1.05285	3.35611e-06	0.000288933
Zm00001eb083830	3.06775	1.76777	0.795246	0.0409977	0.467622
Zm00001eb182480	7.73795	4.84455	0.675588	0.00514864	0.12121
Zm00001eb160630	9.56569	5.45611	0.809997	0.0183332	0.288275
Zm00001eb246720	15.7771	11.3747	0.472	0.0201598	0.307302
Zm00001eb074720	0.210205	0.0001	11.0376	0.0445207	1
Zm00001eb389970	0.89007	0.437238	1.0255	0.048671	0.511076
Zm00001eb015890	89.391	68.6434	0.381008	0.00429467	0.105622
Zm00001eb136250	31.3978	22.6555	0.470803	0.0200801	0.306237
Zm00001eb004150	11.2593	3.62695	1.63429	6.11549e-05	0.00360745
Zm00001eb032200	31.8752	24.4713	0.381345	0.0389556	0.453428
Zm00001eb399910	17.1018	10.819	0.660586	0.0039907	0.0996527
Zm00001eb062040	20.6255	16.2175	0.346877	0.0150686	0.254165
Zm00001eb172290	14.0854	9.38339	0.586022	0.00344281	0.0886586
Zm00001eb291880	16.3756	12.2517	0.418565	0.026956	0.368658
Zm00001eb379630	40.3949	30.5504	0.402983	0.048014	0.508161
Zm00001eb157950	11.9856	7.41391	0.692998	0.0229867	0.334882
Zm00001eb391320	54.9515	38.5721	0.510601	0.0143017	0.24554
Zm00001eb154540	34.5797	26.073	0.407369	0.0491008	0.513235
Zm00001eb225120	11.7982	7.70814	0.614109	0.00948485	0.185815
Zm00001eb016690	6.78135	3.47167	0.965942	3.21524e-06	0.000279226
Zm00001eb106820	0.383927	0.081664	2.23306	0.0155207	0.25907
Zm00001eb125180	0.612036	0.109343	2.48476	0.0340092	0.424397
Zm00001eb124270	3.14618	0.815762	1.94738	0.00307537	0.082108
Zm00001eb081260	7.02981	3.07979	1.19065	0.00658035	0.145127
Zm00001eb053050	13.6805	8.68634	0.655298	0.025228	0.352899
Zm00001eb232230	44.3798	36.6954	0.274305	0.0250177	0.351342
Zm00001eb039040	180.314	127.68	0.497978	0.0183702	0.288606
Zm00001eb289020	2.92123	2.01227	0.537756	0.00862032	0.174212
Zm00001eb428570	1.36078	0.700314	0.958363	0.0357423	0.434312
Zm00001eb423080	3.9575	1.53818	1.36337	0.000383799	0.0168764
Zm00001eb057090	7.52756	5.06539	0.571511	0.025083	0.351342
Zm00001eb207570	15.2719	10.8453	0.493802	0.0320847	0.410715
Zm00001eb260830	5.9959	3.30065	0.861226	0.00244714	0.0692375
Zm00001eb058870	6.36693	4.51162	0.496953	0.0361454	0.436898
Zm00001eb118870	3.03429	2.09163	0.536734	0.0241941	0.344604
Zm00001eb281630	10.1185	7.39039	0.453279	0.0128411	0.227072
Zm00001eb432490	15.3366	10.0668	0.607366	0.00027826	0.0128691
Zm00001eb424620	8.45598	5.97091	0.502021	0.0161297	0.26583
Zm00001eb200650	25.3119	17.8377	0.50489	0.0264961	0.365729
Zm00001eb005780	15.4013	11.2432	0.453998	0.0351995	0.432688
Zm00001eb176030	10.4207	7.82481	0.413329	0.0256082	0.356304
Zm00001eb144510	14.5187	7.79309	0.897642	9.27521e-05	0.00507093
Zm00001eb122570	2.22112	0.793465	1.48505	0.00359775	0.0913952
Zm00001eb386160	8.43985	5.28557	0.675159	0.00354041	0.0905049
Zm00001eb146800	54.0895	30.0444	0.848252	0.00317084	0.0839399
Zm00001eb352720	13.9222	9.76902	0.511099	0.0250453	0.351342
Zm00001eb403360	20.4018	15.4493	0.401152	0.0371695	0.442354
Zm00001eb054420	7.12186	5.19209	0.455937	0.00603014	0.136514
Zm00001eb241110	9.39249	6.9804	0.428196	0.0369058	0.440559
Zm00001eb349250	33.8633	26.419	0.358148	0.0478546	0.507678
Zm00001eb235850	9.23102	6.21286	0.571233	0.0126084	0.224595
Zm00001eb337970	130.624	111.227	0.23192	0.0150448	0.254165
Zm00001eb030110	9.24278	6.14677	0.588498	0.0231202	0.335264
Zm00001eb385100	40.5786	31.8469	0.349568	0.0438065	0.486698
Zm00001eb023400	54.24	34.1424	0.667792	0.0261392	0.36192
Zm00001eb073180	9.5355	7.8218	0.285808	0.0471437	0.504808
Zm00001eb294690	30.3946	16.1289	0.914166	0.000424234	0.0180452
Zm00001eb047870	0.77478	0.223458	1.79378	0.0386648	0.451574
Zm00001eb198730	41.9522	29.5799	0.504131	0.00160531	0.04979
Zm00001eb362650	2.31972	1.46343	0.664595	0.0206966	0.313042
Zm00001eb094410	9.44451	6.05644	0.641005	0.0248713	0.350101
Zm00001eb272790	12.5196	8.34928	0.584467	0.0453501	0.494996
Zm00001eb067980	24.1453	16.624	0.538477	0.0233444	0.337419
Zm00001eb215110	89.9247	70.2757	0.355691	0.0151508	0.255051
Zm00001eb373190	58.8219	42.1544	0.48067	0.0221267	0.327691
Zm00001eb391040	1.42528	0.401727	1.82696	0.0493985	0.514732
Zm00001eb239150	5.41154	2.21243	1.2904	1.17634e-05	0.000886193
Zm00001eb363260	1.48018	0.701828	1.07658	0.0248545	0.350082
Zm00001eb030680	17.3775	11.2264	0.630329	0.0164074	0.268425
Zm00001eb039650	169.269	133.022	0.347658	0.0335259	0.420915
Zm00001eb015260	25.7288	20.7363	0.31123	0.0304992	0.398132
Zm00001eb117770	0.647392	0.124149	2.38257	0.00196032	0.058369
Zm00001eb254390	72.5386	54.4505	0.413805	0.00838996	0.172215
Zm00001eb163560	22.7027	14.2101	0.675946	6.38828e-05	0.00372618
Zm00001eb159720	3.35929	2.36403	0.506909	0.0280199	0.378066
Zm00001eb405630	7.82344	5.51703	0.503913	0.0377221	0.445877
Zm00001eb022860	6.30416	3.01607	1.06364	0.00698433	0.151322
Zm00001eb119550	0.240406	0.0001	11.2313	0.0286008	0.38308
Zm00001eb045470	66.6275	55.646	0.25984	0.0336816	0.421715
Zm00001eb357860	3.52171	2.11907	0.732846	0.0362088	0.436898
Zm00001eb314360	3.33318	1.83148	0.863885	0.0111775	0.207524
Zm00001eb020470	2.08062	1.40397	0.567494	0.0453945	0.495165
Zm00001eb402080	22.787	17.3543	0.392914	0.0119025	0.215596
Zm00001eb000450	110.662	75.1257	0.558786	0.0485996	0.5109
Zm00001eb179710	6.90358	5.05218	0.450438	0.0385108	0.451275
Zm00001eb017260	14.4959	11.2806	0.361805	0.0283155	0.380755
Zm00001eb377390	13.7289	8.50825	0.690282	0.013195	0.231367
Zm00001eb084160	21.7371	16.8459	0.367764	0.0356183	0.433802
Zm00001eb122180	5.38499	3.44946	0.642575	0.0300851	0.395701
Zm00001eb297830	4.0393	2.85231	0.501974	0.00623419	0.139896
Zm00001eb413630	186.639	122.84	0.603467	0.0121537	0.219005
Zm00001eb108280	84.953	54.0693	0.651855	0.0181144	0.285985
Zm00001eb169960	14.1882	9.96289	0.510056	0.00322064	0.0846847
Zm00001eb059630	37.9067	29.2159	0.3757	0.032044	0.41048
Zm00001eb313400	195.734	143.553	0.447316	0.0042352	0.104341
Zm00001eb052610	3.99573	2.24592	0.83115	0.00336973	0.0874285
Zm00001eb092750	4.46902	0.529893	3.07619	0.0191509	0.297433
Zm00001eb374390	4.57602	3.13914	0.543725	0.0477245	0.507291
Zm00001eb367430	2.00987	0.917861	1.13075	0.0126135	0.224595
Zm00001eb330500	15.9191	10.5208	0.597513	0.0243726	0.345886
Zm00001eb324900	52.6505	32.7586	0.684573	0.000796674	0.0290972
Zm00001eb433020	1.76991	0.62699	1.49716	0.000279308	0.012875
Zm00001eb418860	84.2323	62.1368	0.438927	0.0070394	0.152094
Zm00001eb286410	4.99163	2.92734	0.769921	0.00595117	0.135315
Zm00001eb211000	55.9688	42.0202	0.413538	0.0480137	0.508161
Zm00001eb057860	2.62468	1.29928	1.01443	0.0397802	0.460285
Zm00001eb113970	1.7373	0.995079	0.803961	0.00598614	0.135813
Zm00001eb353070	6.44639	4.73875	0.443986	0.0298107	0.393084
Zm00001eb256190	5.83271	3.82533	0.608582	0.0105825	0.200881
Zm00001eb326780	132.197	75.1015	0.815776	0.00103909	0.0356206
Zm00001eb289180	26.3444	18.6647	0.497183	0.00742798	0.158194
Zm00001eb176310	96.014	77.2328	0.314031	0.0229185	0.334188
Zm00001eb259930	1.31793	0.321332	2.03614	0.0361927	0.436898
Zm00001eb021620	23.9659	15.9073	0.591289	0.000561039	0.0223234
Zm00001eb023710	5.05685	3.19585	0.662037	0.00806571	0.167219
Zm00001eb408920	130.951	96.8092	0.43581	0.0299675	0.394485
Zm00001eb290980	22.544	17.082	0.400271	0.0126474	0.224595
Zm00001eb350680	5.77241	3.56865	0.693796	0.0160697	0.265107
Zm00001eb431160	4.72572	3.41616	0.468157	0.0258925	0.359459
Zm00001eb050910	14.5867	10.125	0.526732	0.037257	0.442614
Zm00001eb347610	18.3688	11.321	0.698254	0.0147507	0.250498
Zm00001eb383230	3.82482	2.09962	0.86526	0.00673246	0.147999
Zm00001eb348770	4.69958	3.18361	0.561866	0.0236422	0.339215
Zm00001eb296250	4.49435	2.6439	0.765445	0.0268115	0.367891
Zm00001eb258830	1.52046	0.792722	0.939617	0.00376453	0.0950682
Zm00001eb058490	26.2991	19.4728	0.433549	0.0499262	0.516852
Zm00001eb047880	5.64402	3.36828	0.74471	0.017481	0.279267
Zm00001eb213160	37.5213	27.5062	0.447953	0.0143815	0.246286
Zm00001eb331890	23.9624	17.4361	0.458692	0.0107744	0.202922
Zm00001eb334410	25.5058	20.1716	0.338501	0.0378449	0.446457
Zm00001eb199120	18.3696	14.7481	0.316791	0.049912	0.516852
Zm00001eb145510	34.6944	27.6292	0.328511	0.0228377	0.333333
Zm00001eb063170	4.44697	2.51873	0.820127	0.00265466	0.0737737
Zm00001eb258310	18.4846	11.4862	0.686421	0.000262318	0.012204
Zm00001eb412150	15.166	7.41172	1.03297	0.00316045	0.0837358
Zm00001eb290590	61.4259	41.4541	0.567332	0.00899604	0.179883
Zm00001eb392960	4.93372	3.17838	0.634387	0.0402576	0.462284
Zm00001eb092800	3.49229	2.18607	0.675837	0.023389	0.337515
Zm00001eb058260	44.7406	29.6188	0.595074	0.0183399	0.288275
Zm00001eb339940	52.8202	39.9125	0.404248	0.0471482	0.504808
Zm00001eb158720	10.6977	8.09691	0.401856	0.0270975	0.369623
Zm00001eb134990	17.3143	13.505	0.358467	0.0164623	0.268762
Zm00001eb124780	9.66984	6.70645	0.527941	0.00997535	0.193347
Zm00001eb330450	9.56878	6.79679	0.493482	0.0488476	0.511958

## Sheet: 3 mM K_AMF vs 3 mM K_NM
Gene id	MeanTPM (3 mM K_AMF)	MeanTPM (3 mM K_NM)	log2FoldChange	pValue	qValue
Zm00001eb269160	70.0351	60.4827	0.211557	0.0357494	0.673668
Zm00001eb386150	5.56563	3.55529	0.646578	0.00676714	0.37223
Zm00001eb168160	45.8159	36.9588	0.30993	0.0292367	0.632883
Zm00001eb110280	29.3985	23.0632	0.350148	0.0232214	0.591831
Zm00001eb192490	216.227	95.086	1.18524	5.55373e-07	0.000629771
Zm00001eb149000	96.9256	80.728	0.263807	0.0441673	0.711188
Zm00001eb225670	321.268	273.098	0.234359	0.0403565	0.6902
Zm00001eb430610	23.5046	17.2492	0.446413	0.0183411	0.556845
Zm00001eb345960	13.3833	8.56512	0.643892	0.0437053	0.708378
Zm00001eb322670	33.8091	23.3372	0.534779	0.0317773	0.654479
Zm00001eb057670	0.130784	0.0001	10.353	0.0388196	1
Zm00001eb318230	35.8096	22.2939	0.683694	0.0290028	0.631082
Zm00001eb225240	22.3962	17.3805	0.365791	0.019013	0.560562
Zm00001eb276690	1.1899	0.560682	1.08559	0.0490337	0.734957
Zm00001eb431200	27.9898	19.8385	0.496601	0.0151017	0.516524
Zm00001eb050500	8.49325	5.37298	0.660594	0.00819608	0.407072
Zm00001eb335390	18.7907	12.2385	0.618594	0.0489982	0.734886
Zm00001eb400920	3.93632	2.32777	0.7579	0.000604627	0.0995878
Zm00001eb164750	504	311.837	0.692631	0.000414891	0.0776469
Zm00001eb112210	13.5053	7.90968	0.771833	0.0291889	0.632311
Zm00001eb137930	153.076	55.2755	1.46953	0.043963	0.709448
Zm00001eb048090	18.6466	9.70548	0.942041	0.000174805	0.0464305
Zm00001eb219300	68.9145	48.8213	0.497296	0.00116171	0.14637
Zm00001eb143500	4.77994	0.878528	2.44383	0.000259294	0.0588059
Zm00001eb318780	100.014	85.4127	0.227681	0.0132557	0.502008
Zm00001eb305560	3.00484	1.28987	1.22006	0.0478959	0.730011
Zm00001eb290660	0.506566	0.0001	12.3065	0.00173148	0.184868
Zm00001eb258400	30.704	21.1058	0.540788	0.00152448	0.17421
Zm00001eb402760	48.5121	36.5462	0.408622	0.0370626	0.678618
Zm00001eb227480	86.5784	68.9922	0.327574	0.0142429	0.5079
Zm00001eb001770	115.688	83.2057	0.475481	0.0264093	0.614238
Zm00001eb125480	7.44907	4.76337	0.645077	0.0468555	0.726024
Zm00001eb167100	0.337787	0.0600747	2.49129	0.0389811	0.684017
Zm00001eb275600	1.80501	0.0001	14.1397	0.0411767	0.694099
Zm00001eb214980	4.45383	2.26099	0.978093	0.0247521	0.606622
Zm00001eb385580	6.56782	3.7104	0.823841	8.991e-05	0.0315573
Zm00001eb108630	0.189683	0.0001	10.8894	0.0460889	1
Zm00001eb009730	78.5554	51.3069	0.614559	0.000157538	0.0438177
Zm00001eb402130	1.04769	0.0001	13.3549	3.54218e-05	0.016866
Zm00001eb206320	2.54844	1.18264	1.1076	0.0223007	0.583917
Zm00001eb366050	53.981	43.8267	0.300642	0.013489	0.505874
Zm00001eb066160	2.25045	0.939008	1.261	0.0164504	0.533441
Zm00001eb044060	44.5078	36.0215	0.305199	0.0368032	0.678169
Zm00001eb264590	7.64976	4.28634	0.835668	0.0479523	0.730257
Zm00001eb121070	52.355	43.7505	0.259027	0.0230919	0.591502
Zm00001eb360700	1.72514	0.669131	1.36635	0.00553159	0.339767
Zm00001eb392800	26.8829	21.8885	0.296515	0.0474405	0.726261
Zm00001eb257410	51.4623	45.1457	0.188928	0.0365233	0.676433
Zm00001eb127530	0.738613	0.111092	2.73306	0.00746098	0.389331
Zm00001eb008380	2.61553	1.19416	1.13111	0.0414327	0.694859
Zm00001eb124940	13.5158	8.70169	0.635281	0.0123149	0.493987
Zm00001eb362340	3.48651	1.67603	1.05674	0.0387603	0.682933
Zm00001eb188960	11.0455	8.77156	0.332558	0.00881676	0.425441
Zm00001eb265890	182.685	104.15	0.810698	0.00274575	0.237697
Zm00001eb394170	40.1898	25.1619	0.675588	1.54157e-06	0.0012625
Zm00001eb242420	36.588	27.1365	0.431136	0.00351382	0.27316
Zm00001eb316930	94.5294	62.7685	0.590723	0.018276	0.556845
Zm00001eb017010	0.156034	0.0001	10.6076	0.0483813	1
Zm00001eb211230	0.417436	0.004916	6.40793	0.0459406	1
Zm00001eb123110	120.695	69.1116	0.804367	0.0244029	0.603599
Zm00001eb080920	93.3039	76.1529	0.293038	0.0260291	0.614238
Zm00001eb433010	0.192349	0.011064	4.11978	0.0252926	1
Zm00001eb275090	56.7355	44.0305	0.365749	0.021212	0.576789
Zm00001eb268760	5.75943	3.36397	0.775758	0.0111669	0.47646
Zm00001eb387660	15.2377	9.05876	0.750262	0.048067	0.730788
Zm00001eb303780	2.12864	1.19167	0.83695	0.00639077	0.362726
Zm00001eb354420	20.1638	16.5906	0.281404	0.0331117	0.658282
Zm00001eb330910	137.545	105.423	0.38372	0.0137583	0.5079
Zm00001eb142640	225.096	173.099	0.378939	0.032947	0.658282
Zm00001eb280060	20.8628	16.9473	0.299873	0.00641908	0.362726
Zm00001eb169630	44.9302	33.8908	0.406793	0.0262658	0.614238
Zm00001eb216040	9.03319	6.25643	0.529896	0.0129106	0.499919
Zm00001eb364870	63.5695	35.0607	0.858478	3.83827e-05	0.0176818
Zm00001eb264660	95.9468	65.9083	0.541774	0.0246106	0.606177
Zm00001eb001940	187.11	149.987	0.319045	0.0473467	0.726024
Zm00001eb075300	29.3391	22.8584	0.360103	0.00064105	0.102821
Zm00001eb177670	2.47273	1.74983	0.498892	0.0461165	0.723604
Zm00001eb099440	13.2143	9.92042	0.413627	0.0114699	0.480201
Zm00001eb324600	17.0612	13.9367	0.291828	0.0278207	0.627083
Zm00001eb293780	3.94494	2.16894	0.863015	0.0270145	0.618376
Zm00001eb123380	44.1461	31.3247	0.494987	0.0027291	0.237351
Zm00001eb087630	8.65814	3.35465	1.3679	0.0021745	0.210891
Zm00001eb208030	94.6661	20.6585	2.19611	0.00728884	0.386583
Zm00001eb368570	8.01713	4.64073	0.788734	0.00792504	0.4015
Zm00001eb257130	12.5263	7.83212	0.677485	0.0184891	0.556845
Zm00001eb363620	2.88498	0.937204	1.62213	0.00146955	0.169245
Zm00001eb303690	69.3681	53.4748	0.375413	0.0334026	0.660502
Zm00001eb171130	11.3781	5.3872	1.07866	0.00880047	0.425351
Zm00001eb199050	29.7769	20.4564	0.541641	0.0492517	0.737101
Zm00001eb288100	63.8943	37.6572	0.762762	0.00349698	0.272954
Zm00001eb414350	2.17594	0.0001	14.4094	0.0288514	0.629225
Zm00001eb382240	245.196	198.132	0.307472	0.00981175	0.450592
Zm00001eb111520	15.4194	8.66917	0.830784	0.046873	0.726024
Zm00001eb347900	5.79413	2.98045	0.959062	0.00895177	0.426373
Zm00001eb141010	876.848	612.223	0.518269	0.0136555	0.5077
Zm00001eb398600	0.156214	0.0001	10.6093	0.0384413	1
Zm00001eb354990	8.73455	5.67447	0.622247	0.0494724	0.738903
Zm00001eb311940	33.485	26.2489	0.35126	0.0436353	0.708035
Zm00001eb047030	13.0638	7.53862	0.793206	0.0194334	0.565915
Zm00001eb369620	39.998	23.3124	0.778831	9.51111e-05	0.0326065
Zm00001eb359250	8.22895	5.03945	0.707442	0.000264228	0.0594675
Zm00001eb200770	7.99817	6.42131	0.316803	0.0173621	0.540848
Zm00001eb244990	8.74005	5.20458	0.747859	0.00334286	0.267116
Zm00001eb042220	765.492	507.646	0.592566	0.0115633	0.482031
Zm00001eb071290	3.40756	2.0872	0.707171	0.000256027	0.0588059
Zm00001eb169870	8.4268	4.54455	0.890847	0.000257541	0.0588059
Zm00001eb113920	2.25266	1.2497	0.850047	0.0303203	0.641732
Zm00001eb172420	3242.72	2709.94	0.258945	0.0111115	0.47646
Zm00001eb168830	174.022	139.436	0.319668	0.0359606	0.674389
Zm00001eb397610	63.6451	54.2191	0.231248	0.0368899	0.678494
Zm00001eb231810	21.8028	17.6925	0.301375	0.0332323	0.658902
Zm00001eb049310	91.7722	62.3161	0.558451	0.0240154	0.602624
Zm00001eb157940	0.381858	0.0001	11.8988	0.0272637	0.620488
Zm00001eb070240	217.49	183.073	0.248534	0.0343621	0.664898
Zm00001eb075380	31.13	15.1782	1.0363	0.0230582	0.591151
Zm00001eb084910	3.36763	1.85069	0.863668	0.0317229	0.654479
Zm00001eb294460	2.85376	1.46127	0.965639	0.041266	0.694099
Zm00001eb140640	237.314	171.227	0.470887	0.0250277	0.608547
Zm00001eb309770	105.455	65.0495	0.69702	0.0137466	0.5079
Zm00001eb293150	18.7672	9.9819	0.910827	0.0154716	0.523108
Zm00001eb356980	10.225	7.10953	0.524279	0.00640224	0.362726
Zm00001eb320600	39.1051	31.5511	0.309666	0.0372925	0.679959
Zm00001eb035570	0.264174	0.0308373	3.09874	0.042732	0.701805
Zm00001eb165470	3.24622	1.28302	1.33921	0.0114074	0.480201
Zm00001eb331330	140.37	88.9503	0.658167	0.0472521	0.726024
Zm00001eb289490	261.083	205.932	0.342337	0.000403953	0.0776469
Zm00001eb096510	316.165	268.205	0.237341	0.0472802	0.726024
Zm00001eb342130	3.01671	1.87641	0.684998	0.0416355	0.69508
Zm00001eb432740	6.32438	4.92803	0.359914	0.0365887	0.676753
Zm00001eb264260	3.81662	1.256	1.60346	0.00546541	0.339235
Zm00001eb387280	1.13606	0.430525	1.39987	0.0176229	0.542921
Zm00001eb306040	3.93421	2.62924	0.581428	0.0473243	0.726024
Zm00001eb151190	62.7228	49.7243	0.33504	0.0459767	0.72295
Zm00001eb408830	1.88875	0.831812	1.1831	0.0172991	0.540848
Zm00001eb229190	71.7103	15.3522	2.22373	0.0168099	0.536188
Zm00001eb259360	122.782	104.398	0.234006	0.0111623	0.47646
Zm00001eb308400	160.044	121.816	0.393769	0.0227295	0.590353
Zm00001eb317090	175.806	154.164	0.189523	0.0462679	0.724823
Zm00001eb328560	471.836	360.608	0.387855	0.0407847	0.693858
Zm00001eb042870	348.723	189.523	0.879706	0.0157986	0.527377
Zm00001eb365640	35.1312	22.5048	0.642521	0.0331097	0.658282
Zm00001eb335710	48.4231	37.8844	0.354091	0.0196942	0.566175
Zm00001eb136790	1.04269	0.66096	0.657676	0.0352393	0.670297
Zm00001eb420360	61.3376	49.8016	0.300579	0.00536592	0.337321
Zm00001eb142210	7.87904	6.23357	0.337962	0.0131024	0.501686
Zm00001eb384600	21.8463	14.2209	0.61937	0.00155288	0.176039
Zm00001eb295020	11.7043	7.92208	0.563092	0.0184768	0.556845
Zm00001eb114390	0.613066	0.0001	12.5818	0.0230475	0.591151
Zm00001eb100960	16.9871	11.5609	0.555183	0.0129674	0.499919
Zm00001eb257220	1.28197	0.588056	1.12434	0.00669545	0.37036
Zm00001eb305810	10.9387	6.81198	0.683292	0.0141009	0.5079
Zm00001eb146000	20.0697	10.4259	0.944845	5.74674e-08	8.06815e-05
Zm00001eb388550	49.9813	36.8212	0.440854	0.0149196	0.513271
Zm00001eb096940	36.297	23.6016	0.620966	0.0123789	0.495205
Zm00001eb374900	14.9409	8.88245	0.750236	0.0281808	0.627083
Zm00001eb036970	139.398	111.607	0.320779	0.0425589	0.701805
Zm00001eb041140	192.098	135.275	0.505954	0.00122738	0.15141
Zm00001eb343640	14.4965	8.9915	0.689071	6.87055e-05	0.0259698
Zm00001eb429290	47.5571	27.0249	0.815371	0.0233055	0.591831
Zm00001eb121020	155.163	99.4489	0.641756	0.0161838	0.530814
Zm00001eb405380	1.12279	0.389071	1.52898	0.0470378	0.726024
Zm00001eb222700	5.37077	3.09226	0.796468	0.0472457	0.726024
Zm00001eb127080	378.295	316.347	0.258007	0.0114668	0.480201
Zm00001eb392870	4.57372	1.88085	1.28198	0.00421132	0.299635
Zm00001eb284170	156.716	99.2764	0.658634	0.0265745	0.614238
Zm00001eb394430	44.9732	31.4532	0.515862	0.0372495	0.679959
Zm00001eb040180	64.9807	47.42	0.454516	0.0342437	0.664706
Zm00001eb286170	12.9644	5.04178	1.36255	0.0129687	0.499919
Zm00001eb372830	48.4764	33.6314	0.527472	0.0482472	0.730788
Zm00001eb362380	6.92626	3.06639	1.17554	0.000183221	0.0473851
Zm00001eb017200	35.0739	29.6082	0.2444	0.0414168	0.694859
Zm00001eb367230	0.759806	0.0001	12.8914	0.0411131	0.694099
Zm00001eb049060	1.57374	0.674472	1.22236	0.00973159	0.449009
Zm00001eb343220	126.037	109.598	0.201626	0.0355192	0.671722
Zm00001eb038860	40.5784	25.3947	0.676186	0.00516513	0.332171
Zm00001eb119410	20.8706	13.4517	0.63368	0.00190116	0.195985
Zm00001eb075700	50.4941	36.3583	0.473829	0.0128173	0.499197
Zm00001eb062580	21.6546	11.632	0.896579	3.38868e-05	0.0166514
Zm00001eb001720	66.2514	53.6997	0.303038	0.0132057	0.502008
Zm00001eb163880	27.1878	13.7306	0.98556	0.0129989	0.499919
Zm00001eb098320	0.173723	0.0001	10.7626	0.0191158	1
Zm00001eb321440	2.15986	1.54054	0.487499	0.0378791	0.681384
Zm00001eb054650	5.08077	2.28355	1.15377	0.0443623	0.712382
Zm00001eb374080	119.333	75.1654	0.666851	0.0291373	0.632123
Zm00001eb144480	2.88646	2.25919	0.353493	0.0173084	0.540848
Zm00001eb146420	41.2359	34.6207	0.252265	0.0346603	0.666969
Zm00001eb296600	2.96669	2.01546	0.557745	0.0201581	0.568282
Zm00001eb378140	0.719592	0.271227	1.40768	0.0254412	0.609327
Zm00001eb019550	3.19279	1.28477	1.31331	0.0216356	0.579021
Zm00001eb103190	20.5767	15.0533	0.450932	0.00471287	0.314365
Zm00001eb304780	2.77207	2.05245	0.43362	0.0378418	0.681384
Zm00001eb015240	59.3099	48.3979	0.29333	0.0145054	0.509131
Zm00001eb366870	3.60079	1.60123	1.16913	0.010223	0.460523
Zm00001eb279840	80.1793	63.8216	0.329185	0.0336428	0.663471
Zm00001eb353010	23.0051	13.4602	0.77325	0.0338508	0.664462
Zm00001eb141530	53.8083	27.5901	0.963677	0.0493403	0.738052
Zm00001eb249470	21.66	14.2773	0.601315	0.0399913	0.689684
Zm00001eb200040	1.78709	0.687968	1.3772	0.00231059	0.215801
Zm00001eb102000	2.37793	1.00282	1.24564	0.0298037	0.634569
Zm00001eb048280	10.3295	7.77293	0.410243	0.0278037	0.627083
Zm00001eb319820	161.756	136.268	0.247374	0.0351128	0.670051
Zm00001eb050280	633.54	403.694	0.650174	0.0166115	0.533503
Zm00001eb009150	25.5644	16.7407	0.610777	0.000152194	0.0434813
Zm00001eb146690	49.3469	40.3105	0.291802	0.0291186	0.632123
Zm00001eb431840	65.9189	44.3546	0.571608	0.0250795	0.608547
Zm00001eb067030	3.75214	0.966675	1.95661	0.000103326	0.0338486
Zm00001eb040730	34.681	28.8322	0.266465	0.0233027	0.591831
Zm00001eb420160	6.38917	3.54801	0.84862	0.0451191	0.715956
Zm00001eb134020	62.7696	41.9111	0.582734	0.0070937	0.379873
Zm00001eb287560	0.565787	0.026323	4.42586	0.0060356	0.352547
Zm00001eb205860	0.202403	0.0124387	4.02433	0.0453949	0.718145
Zm00001eb310210	0.393695	0.0001	11.9429	0.0260528	1
Zm00001eb129030	82.1375	59.1799	0.472933	0.0295921	0.633291
Zm00001eb029260	0.265106	0.077878	1.76728	0.00598061	0.351734
Zm00001eb221740	139.754	107.496	0.378602	0.012539	0.49823
Zm00001eb011380	87.4847	63.1683	0.469831	0.000416111	0.0776469
Zm00001eb369000	15.6683	9.22158	0.764762	0.0485339	0.732305
Zm00001eb007920	6.15365	3.8162	0.689307	0.000423123	0.0784587
Zm00001eb386570	0.506484	0.13587	1.89829	0.00368858	0.278918
Zm00001eb432310	2.00463	0.0001	14.291	0.0432222	0.705603
Zm00001eb146710	173.758	129.261	0.426786	0.0492103	0.736854
Zm00001eb399560	56.9425	43.0937	0.402028	0.0372704	0.679959
Zm00001eb140400	416.038	235.957	0.818191	0.0128706	0.499919
Zm00001eb130720	61.6174	42.3826	0.539867	0.00550763	0.339544
Zm00001eb418410	34.4449	29.4764	0.22473	0.0397884	0.689437
Zm00001eb340000	20.2128	13.2202	0.612522	0.047039	0.726024
Zm00001eb311010	3.65084	2.62502	0.475899	0.0428855	0.703223
Zm00001eb430170	196.082	141.305	0.472642	0.0260896	0.614238
Zm00001eb124570	4.44733	3.33107	0.416954	0.0253524	0.608547
Zm00001eb003860	4.965	3.31193	0.584123	0.0122208	0.493568
Zm00001eb282040	12.1756	1.93272	2.65528	0.000207898	0.0515081
Zm00001eb038740	0.279678	0.0001	11.4496	0.0080492	0.403833
Zm00001eb063420	1.23646	0.571554	1.11325	0.0085778	0.419402
Zm00001eb169270	3.54427	1.18243	1.58374	0.0426717	0.701805
Zm00001eb076820	47.1367	39.243	0.264418	0.0232948	0.591831
Zm00001eb065210	14.5027	3.79798	1.93302	3.38256e-05	0.0166514
Zm00001eb013440	117.4	98.9	0.247386	0.0442808	0.711764
Zm00001eb266840	4582.52	3685.86	0.31414	0.0468931	0.726024
Zm00001eb352790	7.03441	5.21375	0.432107	0.034269	0.664706
Zm00001eb148000	512.861	324.619	0.65982	0.00290468	0.243985
Zm00001eb406730	40.2471	32.6279	0.302777	0.0253847	0.608547
Zm00001eb257670	497.319	447.419	0.152545	0.0484933	0.732304
Zm00001eb321920	38.1042	27.2505	0.48367	0.0191868	0.562309
Zm00001eb353110	29.9498	24.1841	0.308491	0.0445273	0.713866
Zm00001eb367720	2.70923	1.49172	0.860903	0.00278765	0.239616
Zm00001eb146840	4.94165	2.40818	1.03705	1.53439e-05	0.00941266
Zm00001eb401820	0.456949	0.141539	1.69083	0.032479	0.656774
Zm00001eb105070	6.03244	3.59643	0.746177	0.0281119	0.627083
Zm00001eb331360	26.5062	17.8469	0.570654	0.0145013	0.509131
Zm00001eb159390	11.276	6.56759	0.779819	0.00962008	0.445257
Zm00001eb072700	46.6594	29.8802	0.642978	0.0062813	0.359595
Zm00001eb041480	55.8373	44.1232	0.339692	0.0263681	0.614238
Zm00001eb302900	98.3799	62.467	0.65527	0.0277005	0.62678
Zm00001eb238910	32.0756	25.7288	0.318089	0.0386467	0.682933
Zm00001eb376100	10.8069	8.01397	0.431369	0.0499128	0.74122
Zm00001eb018890	0.0863443	0.0001	9.75396	0.0221948	1
Zm00001eb143300	97.633	80.3697	0.280718	0.0375933	0.680688
Zm00001eb298570	82.2651	62.2102	0.40313	0.0335598	0.662722
Zm00001eb397270	41.6624	31.4026	0.407862	0.00460495	0.31211
Zm00001eb059700	3.70246	2.11591	0.807207	0.0255592	0.610666
Zm00001eb229490	69.4748	50.3691	0.463951	0.0132262	0.502008
Zm00001eb266490	511.659	345.979	0.564498	0.0127048	0.499197
Zm00001eb016680	1.82293	1.38189	0.399611	0.0054301	0.338468
Zm00001eb250510	0.310282	0.0001	11.5994	0.0022636	1
Zm00001eb027920	122.812	100.366	0.291186	0.0454962	0.71846
Zm00001eb074350	646.911	542.255	0.254595	0.0326594	0.658166
Zm00001eb199930	10.1344	8.0703	0.328562	0.0170024	0.536188
Zm00001eb298030	37.9179	26.1068	0.538455	0.00167683	0.183104
Zm00001eb044940	0.493607	0.0001	12.2691	0.0319019	1
Zm00001eb256000	13.4131	6.53637	1.03708	1.5987e-05	0.00942691
Zm00001eb129570	32.0706	26.9434	0.25132	0.0435629	0.7074
Zm00001eb248870	6.42506	4.2497	0.596351	0.00636564	0.362313
Zm00001eb218020	7.34823	5.98925	0.295021	0.0483094	0.730788
Zm00001eb387920	95.8171	69.0958	0.471685	0.0314251	0.653041
Zm00001eb039940	2.01951	0.0001	14.3017	0.037959	0.681504
Zm00001eb219750	57.4379	46.9969	0.289437	0.0140106	0.5079
Zm00001eb280930	16.4899	9.43948	0.804806	0.00227878	0.214913
Zm00001eb021230	7.82453	5.70693	0.455289	0.0143321	0.5079
Zm00001eb258990	22.8905	17.1163	0.419379	0.0210409	0.575463
Zm00001eb233630	1.94273	0.834651	1.21884	0.0246533	0.606215
Zm00001eb322840	9.20816	7.16206	0.362537	0.00432432	0.304124
Zm00001eb322260	38.9727	29.4534	0.404029	0.0185674	0.556845
Zm00001eb015980	10.9356	5.71549	0.936088	0.0475404	0.727119
Zm00001eb402430	26.039	17.704	0.556598	0.001096	0.140493
Zm00001eb158740	30.3695	23.3326	0.380275	0.00947762	0.441225
Zm00001eb383600	2.0585	0.89228	1.20602	0.00706784	0.379873
Zm00001eb271420	28.5326	22.2696	0.357537	0.0476944	0.72821
Zm00001eb143340	31.0704	26.0803	0.252581	0.0462326	0.724654
Zm00001eb352710	90.0567	52.63	0.77495	0.000286124	0.0624873
Zm00001eb283260	1.36546	0.304115	2.16671	0.00164944	0.180782
Zm00001eb277100	8.69437	4.40814	0.979913	0.00181198	0.190795
Zm00001eb320650	207.323	152.296	0.445003	0.00886206	0.425813
Zm00001eb322650	279.532	208.52	0.422826	0.020463	0.571858
Zm00001eb044450	53.2285	42.9562	0.309331	0.0330059	0.658282
Zm00001eb326080	169.146	101.793	0.732635	0.0472706	0.726024
Zm00001eb163340	0.749191	0.224135	1.74096	0.0126307	0.499197
Zm00001eb128850	36.3555	28.0092	0.37627	0.0143313	0.5079
Zm00001eb311490	102.34	76.2802	0.423994	0.0212597	0.576789
Zm00001eb349260	9.23586	6.77229	0.447603	0.0250875	0.608547
Zm00001eb193370	49.8558	35.6853	0.482431	0.000478995	0.0855892
Zm00001eb188900	38.973	34.2615	0.185888	0.0357097	0.673668
Zm00001eb408860	138.653	115.826	0.25952	0.0328119	0.658282
Zm00001eb019640	49.3352	31.9505	0.626778	0.0410831	0.694099
Zm00001eb167120	4.18854	2.93656	0.512319	0.0435297	0.7074
Zm00001eb249360	27.4702	22.6216	0.280165	0.0318621	0.654479
Zm00001eb333040	0.139212	0.0001	10.4431	0.0260528	1
Zm00001eb279540	0.101206	0.0001	9.98308	0.0458676	1
Zm00001eb130850	2.956	1.69656	0.801034	0.0382809	0.682302
Zm00001eb420910	53.0642	39.8698	0.412443	0.0186415	0.556845
Zm00001eb043610	64.5457	48.2502	0.419785	0.00526026	0.334964
Zm00001eb229840	8.07347	5.54778	0.541279	0.0425039	0.701805
Zm00001eb061770	76.3175	34.3972	1.14972	0.0137091	0.5079
Zm00001eb198900	17.1892	9.68369	0.827877	0.00542664	0.338468
Zm00001eb221280	74.0005	53.9329	0.456368	0.01163	0.482031
Zm00001eb184430	0.996999	0.161092	2.6297	0.0145241	0.509172
Zm00001eb074090	0.133696	0.0001	10.3847	0.011111	0.47646
Zm00001eb409190	0.448968	0.0851253	2.39895	0.0262354	0.614238
Zm00001eb145870	665.562	473.446	0.491374	0.000898225	0.126106
Zm00001eb249440	18.236	14.1518	0.365801	0.0228766	0.591151
Zm00001eb004380	68.914	0.0001	19.3944	5.10296e-13	3.76126e-09
Zm00001eb094200	2.81537	1.25356	1.16729	0.00442804	0.305742
Zm00001eb022710	208.415	125.193	0.735308	0.032151	0.654899
Zm00001eb330160	33.9046	26.1434	0.375033	0.0460929	0.723604
Zm00001eb075940	1.52639	0.306443	2.31643	0.00172131	0.184868
Zm00001eb221910	34.2201	20.1442	0.76448	5.44155e-05	0.0213911
Zm00001eb038730	270.481	137.14	0.979875	0.0324044	0.656168
Zm00001eb027020	2.10752	0.914659	1.20424	0.0102663	0.461151
Zm00001eb322380	8.81693	7.65216	0.204408	0.0328069	0.658282
Zm00001eb415440	3.46795	1.8883	0.876997	0.000339573	0.0700114
Zm00001eb282360	34.0238	26.8152	0.343491	0.0136795	0.5079
Zm00001eb244390	6.99389	3.90382	0.841209	0.0391777	0.684805
Zm00001eb185950	103.632	88.6988	0.224485	0.0448013	0.714757
Zm00001eb155530	1.27485	0.867806	0.554887	0.0475489	0.727119
Zm00001eb112460	35.6886	4.10212	3.12102	0.0216047	0.579021
Zm00001eb277220	21.6116	14.6035	0.565486	0.040359	0.6902
Zm00001eb176760	20.2787	12.9021	0.652361	0.0190941	0.56071
Zm00001eb137990	42.64	30.2818	0.493759	0.0461519	0.723774
Zm00001eb103510	19.8305	16.4745	0.267488	0.0412591	0.694099
Zm00001eb148280	66.8342	51.3875	0.379169	0.0385089	0.682302
Zm00001eb372130	27.4142	16.8928	0.698519	0.0168413	0.536188
Zm00001eb326800	17.1256	12.4123	0.464385	0.0285804	0.627083
Zm00001eb336120	40.4492	30.5044	0.407093	0.0390992	0.68432
Zm00001eb398500	3.98578	0.684584	2.54156	0.00842883	0.414281
Zm00001eb426540	0.516509	0.0001	12.3346	0.00469539	1
Zm00001eb173640	37.3064	22.7676	0.712444	0.0204501	0.571858
Zm00001eb067040	2.87614	1.42104	1.01719	0.0114519	0.480201
Zm00001eb079180	72.6774	35.9599	1.01512	0.0166582	0.533842
Zm00001eb077180	44.7098	35.6177	0.327999	0.0027492	0.237697
Zm00001eb142130	21.8996	7.19181	1.60648	1.68151e-07	0.000206567
Zm00001eb008470	36.663	29.8017	0.29893	0.00484445	0.320244
Zm00001eb017070	3.46874	2.53483	0.45252	0.0151459	0.516836
Zm00001eb123280	59.541	43.011	0.469176	0.0154086	0.522174
Zm00001eb336100	2.17379	0.951511	1.19192	0.00268815	0.235177
Zm00001eb040580	12.0684	5.46766	1.14224	0.0104995	0.463677
Zm00001eb198560	77.7808	64.7468	0.264605	0.0127791	0.499197
Zm00001eb240650	802.78	471.965	0.766324	0.00766309	0.394295
Zm00001eb143400	35.2056	24.8061	0.505106	0.0057969	0.346389
Zm00001eb200350	53.5268	43.2136	0.308774	0.0398578	0.689629
Zm00001eb305420	15.0465	11.004	0.451411	0.0286734	0.627601
Zm00001eb041550	9.59143	5.38837	0.831898	0.0132641	0.502008
Zm00001eb251700	176.913	147.439	0.262928	0.0244445	0.603599
Zm00001eb293270	5.66111	3.11668	0.861074	0.0326375	0.658166
Zm00001eb146890	103.693	89.2009	0.217194	0.0149688	0.513766
Zm00001eb001140	0.930755	0.341047	1.44843	0.0264074	0.614238
Zm00001eb347030	18.3967	14.7207	0.321595	0.00231296	0.215801
Zm00001eb366340	0.34467	0.0149837	4.52375	0.00348373	0.272954
Zm00001eb304980	0.147157	0.00772767	4.25118	0.0268817	1
Zm00001eb001960	15.9002	10.244	0.634261	0.0195904	0.566175
Zm00001eb282070	4.18867	1.98531	1.07713	0.0193576	0.564863
Zm00001eb167910	106.182	60.2441	0.81764	0.0361778	0.674655
Zm00001eb330700	2.18023	0.936501	1.21913	0.00135996	0.161819
Zm00001eb284020	2.27722	0.912973	1.31863	0.0170357	0.536188
Zm00001eb007740	28.3556	11.4539	1.3078	0.000343852	0.0704013
Zm00001eb383500	30.6428	22.4858	0.446529	0.00185602	0.19336
Zm00001eb334830	5.34298	3.7739	0.501589	0.0188217	0.557149
Zm00001eb396290	1.75295	0.736089	1.25183	0.0237601	0.600788
Zm00001eb232590	166.5	121.688	0.452333	0.0186006	0.556845
Zm00001eb022210	4.15721	2.93998	0.49981	0.00326716	0.263906
Zm00001eb016370	29.3946	18.1138	0.698464	0.00461567	0.312119
Zm00001eb209360	27.1527	16.1452	0.749989	0.0345097	0.665
Zm00001eb170150	191.044	118.487	0.689177	0.0112504	0.477054
Zm00001eb292770	68.3246	57.6313	0.245553	0.0354632	0.671722
Zm00001eb117620	0.466749	0.0001	12.1884	4.77095e-05	0.0197836
Zm00001eb103200	6.94246	5.08781	0.4484	0.0296207	0.633291
Zm00001eb425020	7.80571	6.09517	0.356864	0.0377252	0.681384
Zm00001eb300280	68.7322	56.2628	0.288804	0.0396689	0.689437
Zm00001eb325030	21.3954	13.3192	0.683798	0.00163536	0.180782
Zm00001eb003700	50.253	34.9889	0.522315	0.00763504	0.394295
Zm00001eb207300	30.6226	25.2913	0.275958	0.043128	0.704456
Zm00001eb303250	0.270992	0.00748767	5.17759	3.65126e-05	0.0170873
Zm00001eb397820	106.887	65.1691	0.713831	0.0193697	0.564863
Zm00001eb408760	55.2582	35.0814	0.655481	0.000991087	0.13328
Zm00001eb055880	82.5567	63.8017	0.371791	0.0110787	0.47646
Zm00001eb336480	23.9871	16.6518	0.52658	0.00121891	0.150996
Zm00001eb311510	1.25925	0.0001	13.6203	0.00510908	0.329609
Zm00001eb009660	7.14225	5.60832	0.34881	0.0412053	0.694099
Zm00001eb202080	5.24204	2.85843	0.874906	0.00804632	0.403833
Zm00001eb425740	14.7574	12.1933	0.275359	0.0316648	0.654222
Zm00001eb004630	43.1943	31.2752	0.465822	0.0295126	0.633291
Zm00001eb275030	14.1943	11.0331	0.363474	0.0481674	0.730788
Zm00001eb145500	97.7167	71.8351	0.443916	0.000860741	0.122006
Zm00001eb042320	7.95895	5.70402	0.4806	0.0115937	0.482031
Zm00001eb416230	43.0661	35.4989	0.278778	0.0449503	0.715588
Zm00001eb110060	32.6885	24.7253	0.402796	0.0368371	0.678213
Zm00001eb386040	1.06507	0.39416	1.43409	0.0262805	0.614238
Zm00001eb418750	20.7025	15.1275	0.452633	0.0162886	0.531824
Zm00001eb192500	3.30018	2.12982	0.63181	0.00337422	0.268146
Zm00001eb100180	91.581	77.942	0.232648	0.0330633	0.658282
Zm00001eb154350	40.5604	17.093	1.24666	0.000852757	0.122006
Zm00001eb003830	331.867	230.141	0.528088	0.0176017	0.542835
Zm00001eb052890	11.9792	7.53774	0.668328	0.0412845	0.694099
Zm00001eb311700	30.494	24.2624	0.329802	0.0187943	0.557149
Zm00001eb165590	332.79	239.314	0.475707	0.0038222	0.286743
Zm00001eb031610	18.143	13.0258	0.478048	0.00684058	0.374871
Zm00001eb386200	0.538968	0.110552	2.28547	0.0313349	0.653041
Zm00001eb389420	146.163	116.528	0.326901	0.0107503	0.469515
Zm00001eb204270	40.9152	31.781	0.364471	0.0395961	0.689437
Zm00001eb030730	67.0172	57.4774	0.221536	0.0366361	0.677006
Zm00001eb358800	27.6479	19.6372	0.493585	0.0217372	0.579021
Zm00001eb349050	42.2356	29.4602	0.519689	0.00363097	0.27662
Zm00001eb229780	11.2979	4.14386	1.44701	0.00228158	0.214913
Zm00001eb230800	124.991	103.799	0.268028	0.0139267	0.5079
Zm00001eb284160	317.187	204.943	0.630109	0.00912705	0.433322
Zm00001eb121420	65.4223	48.1452	0.442389	0.00877659	0.425351
Zm00001eb147080	12.6386	8.77815	0.525854	0.0100893	0.457273
Zm00001eb206400	219.117	161.845	0.437089	0.0412557	0.694099
Zm00001eb289250	31.7714	26.4317	0.265462	0.0328034	0.658282
Zm00001eb100190	59.9637	50.6773	0.242749	0.0206752	0.572416
Zm00001eb248410	0.269508	0.0001	11.3961	0.0394701	1
Zm00001eb087060	14.1517	11.3978	0.312219	0.044806	0.714757
Zm00001eb370580	54.3335	40.8187	0.412614	0.00125035	0.153601
Zm00001eb424240	58.5504	46.6373	0.328194	0.037057	0.678618
Zm00001eb226430	190.708	138.919	0.457114	0.01009	0.457273
Zm00001eb163890	11.9199	5.77245	1.04612	0.0314599	0.653041
Zm00001eb271760	33.6948	20.673	0.704776	0.00212025	0.207599
Zm00001eb173980	24.5635	14.2308	0.787503	1.56436e-05	0.00941266
Zm00001eb162720	22.4901	14.9084	0.593169	0.0238213	0.601663
Zm00001eb224910	24.6215	15.738	0.645668	0.00173732	0.184868
Zm00001eb294750	4.86898	2.53937	0.939149	0.0135378	0.505874
Zm00001eb168270	133.791	111.22	0.26656	0.0213327	0.576961
Zm00001eb220340	74.307	56.8485	0.386375	0.0348667	0.668385
Zm00001eb154790	241.634	169.298	0.513261	0.00444764	0.306378
Zm00001eb374220	5.74193	2.2646	1.34228	0.0103076	0.461151
Zm00001eb369590	46.5771	32.8042	0.505743	0.0215817	0.579021
Zm00001eb313920	6.29662	3.98686	0.659325	0.0208973	0.573339
Zm00001eb372330	18.9756	15.911	0.254118	0.0128044	0.499197
Zm00001eb068460	137.134	103.498	0.405988	0.00535378	0.337321
Zm00001eb082840	11.0105	6.50079	0.760191	0.00260543	0.230678
Zm00001eb292950	39.0821	26.4543	0.563006	0.0163693	0.533441
Zm00001eb241150	114.024	94.2187	0.275253	0.0168985	0.536188
Zm00001eb097880	190.125	133.226	0.513078	0.0177423	0.546028
Zm00001eb374410	4.98478	2.88196	0.790479	0.00253411	0.229887
Zm00001eb124950	6.85278	3.57917	0.937064	0.00205168	0.205747
Zm00001eb273170	0.406042	0.0001	11.9874	0.0396178	1
Zm00001eb121200	13.7977	10.3968	0.408296	0.0421853	0.697947
Zm00001eb164720	11.3714	6.80385	0.74098	0.0061688	0.357318
Zm00001eb045910	52.959	45.0879	0.232135	0.0409652	0.694099
Zm00001eb135260	0.56484	0.0001	12.4636	0.00449101	0.307212
Zm00001eb048020	31.9881	14.7103	1.12071	0.00950302	0.441225
Zm00001eb198310	18.3242	12.7607	0.522045	0.0283274	0.627083
Zm00001eb084290	216.639	160.872	0.429385	0.00368733	0.278918
Zm00001eb331420	1.38623	0.637056	1.12168	0.0365255	0.676433
Zm00001eb378280	105.653	81.4918	0.374603	0.0320503	0.654899
Zm00001eb330300	32.5264	18.0396	0.850444	6.54e-06	0.00459093
Zm00001eb239520	162.631	125.17	0.377718	0.00268555	0.235177
Zm00001eb068610	6.83711	4.08057	0.744614	0.0387193	0.682933
Zm00001eb352930	12.874	9.87561	0.38252	0.0263483	0.614238
Zm00001eb429330	75.4881	39.3736	0.939019	0.0117575	0.484821
Zm00001eb116960	74.5597	49.9675	0.577406	0.0122997	0.493987
Zm00001eb047940	37.7311	30.1728	0.322505	0.0160241	0.528454
Zm00001eb083840	3.17971	1.0559	1.59042	0.000231353	0.0550078
Zm00001eb079870	1.17679	0.507513	1.21334	0.000140856	0.0423762
Zm00001eb042270	59.7452	39.9405	0.580972	0.0331022	0.658282
Zm00001eb058720	8.55307	4.79213	0.835777	0.0328725	0.658282
Zm00001eb163210	8.95768	6.67261	0.424874	0.0296505	0.633468
Zm00001eb359190	28.3635	17.4328	0.702232	0.00259521	0.230678
Zm00001eb427950	43.5832	25.1837	0.791281	2.48802e-06	0.00198255
Zm00001eb372600	95.0106	66.3654	0.517657	0.021223	0.576789
Zm00001eb145330	11.4089	8.10247	0.493722	0.000703281	0.107994
Zm00001eb060490	22.3741	16.8786	0.406634	0.0244244	0.603599
Zm00001eb068000	28.6679	20.7049	0.469464	2.06276e-05	0.0112623
Zm00001eb118620	3.1976	2.09571	0.609546	0.0473542	0.726024
Zm00001eb229360	1.38332	0.54232	1.35092	0.0103684	0.46247
Zm00001eb176800	8.35998	5.5023	0.603466	0.0342476	0.664706
Zm00001eb314080	11.1297	9.03989	0.300035	0.0406352	0.691713
Zm00001eb197780	96.1018	76.8369	0.322765	0.0266254	0.614238
Zm00001eb163830	46.5173	38.3072	0.280151	0.0435349	0.7074
Zm00001eb277570	2.05127	1.1451	0.841049	0.0281806	0.627083
Zm00001eb123150	98.2989	78.6372	0.321963	0.000166147	0.0449404
Zm00001eb264670	30.3496	18.9672	0.678171	0.00765144	0.394295
Zm00001eb145100	44.5326	26.5724	0.744931	0.000643866	0.102821
Zm00001eb079310	35.3779	24.6511	0.521196	0.000980677	0.13328
Zm00001eb314320	11.2863	6.30682	0.83959	0.000156273	0.0438177
Zm00001eb091400	234.922	198.885	0.240245	0.037743	0.681384
Zm00001eb277290	28.0405	7.33184	1.93526	0.00360511	0.276077
Zm00001eb401880	2.15092	0.430596	2.32055	0.0143047	0.5079
Zm00001eb365580	67.401	42.5675	0.663018	0.0160485	0.528668
Zm00001eb398550	68.4269	40.3271	0.762814	0.002821	0.24038
Zm00001eb041390	170.819	108.333	0.656987	0.000151118	0.0434813
Zm00001eb153000	333.608	152.262	1.1316	0.0136186	0.5077
Zm00001eb189470	48.8861	31.8421	0.618489	0.0298797	0.635142
Zm00001eb300250	54.3872	41.8476	0.378121	0.0111505	0.47646
Zm00001eb261860	0.177591	0.0001	10.7943	0.0464046	1
Zm00001eb251880	1.26769	0.78717	0.687454	0.0013775	0.162054
Zm00001eb250180	9.6943	5.80539	0.739744	0.0164039	0.533441
Zm00001eb266430	2.60088	0.233831	3.47547	0.00701424	0.379873
Zm00001eb151540	73.1955	54.8474	0.416333	0.00105586	0.138157
Zm00001eb040550	45.9302	38.3819	0.259015	0.0193186	0.564489
Zm00001eb046860	100.331	68.8413	0.543427	0.0471081	0.726024
Zm00001eb130260	21.8553	11.377	0.941869	0.00862263	0.420896
Zm00001eb158880	50.5015	37.4795	0.430224	0.00493922	0.322889
Zm00001eb178320	71.3683	62.0068	0.202856	0.0466954	0.726024
Zm00001eb104260	16.6064	13.8042	0.266631	0.0326553	0.658166
Zm00001eb367150	8.89134	5.32415	0.739849	0.0250682	0.608547
Zm00001eb155060	131.628	106.159	0.310249	0.0296079	0.633291
Zm00001eb321960	1.89414	0.138095	3.77781	0.00140633	0.163885
Zm00001eb071110	10.4595	7.07612	0.563781	0.000993077	0.13328
Zm00001eb280920	5.54377	3.86536	0.520263	0.0142482	0.5079
Zm00001eb395600	116.359	57.9878	1.00477	0.00193179	0.19776
Zm00001eb057000	25.767	19.533	0.399613	0.0258662	0.613341
Zm00001eb281300	4.25061	1.74659	1.28313	0.0151813	0.517444
Zm00001eb152600	23.2466	19.4548	0.256891	0.0448253	0.714757
Zm00001eb167960	156.008	94.9882	0.715797	0.000413699	0.0776469
Zm00001eb394560	1.4107	0.339277	2.05587	0.0339828	0.664706
Zm00001eb406220	2.42392	0.830973	1.54447	0.0048856	0.32111
Zm00001eb311730	6.78251	4.90737	0.466868	0.0283417	0.627083
Zm00001eb369650	129.693	99.6143	0.380675	0.0242345	0.602959
Zm00001eb287840	0.290895	0.0286557	3.34361	0.0434727	1
Zm00001eb385250	29.3346	24.7292	0.246389	0.022538	0.587227
Zm00001eb418230	40.0653	21.0109	0.931218	0.00781028	0.398392
Zm00001eb271440	358.867	241.411	0.571958	0.00064518	0.102821
Zm00001eb138370	1.0466	0.560112	0.901924	0.0453988	0.718145
Zm00001eb004410	1.30274	0.759981	0.777509	0.0171629	0.538311
Zm00001eb144630	47.2048	39.3916	0.261044	0.0209695	0.574043
Zm00001eb344380	0.271918	0.0001	11.409	0.0145269	1
Zm00001eb224180	111.46	77.4174	0.5258	0.000224925	0.0543563
Zm00001eb291160	85.8523	73.3784	0.226501	0.0431217	0.704456
Zm00001eb026350	3.78482	2.30198	0.717347	0.0112684	0.477054
Zm00001eb230850	0.659368	0.0001	12.6869	0.000186136	0.0477203
Zm00001eb056340	0.516431	0.0820017	2.65485	0.00705421	0.379873
Zm00001eb315410	28.8408	22.0158	0.389575	0.0127005	0.499197
Zm00001eb164450	8.37504	5.86797	0.513235	0.0280188	0.627083
Zm00001eb107500	1.32679	0.309727	2.09887	0.0133837	0.50524
Zm00001eb218560	463.596	309.473	0.583058	0.0245756	0.606177
Zm00001eb285200	9.99306	7.58533	0.397715	0.00952108	0.441368
Zm00001eb241720	29.5891	23.1816	0.352088	0.0438176	0.708999
Zm00001eb011430	158.938	90.8055	0.807612	0.0131903	0.502008
Zm00001eb302920	45.2509	30.5659	0.566021	0.0400955	0.689684
Zm00001eb434590	213.566	159.609	0.420136	0.0255958	0.611046
Zm00001eb033760	1.51136	0.707936	1.09416	0.000399676	0.0776469
Zm00001eb373570	10.3126	6.3806	0.692651	0.0496958	0.74114
Zm00001eb411540	27.7557	16.3099	0.767037	0.00868208	0.422619
Zm00001eb427160	0.26302	0.056633	2.21546	0.0199155	0.567862
Zm00001eb021780	12.9932	9.56959	0.441229	0.0125684	0.498726
Zm00001eb024440	14.5044	8.91198	0.702668	0.00657616	0.367369
Zm00001eb079210	9.47083	5.24769	0.85181	0.00362632	0.27662
Zm00001eb290620	3.07578	1.28648	1.25753	0.0120582	0.490386
Zm00001eb155600	20.5618	15.8021	0.379851	0.000808119	0.119727
Zm00001eb056060	2.57038	1.00264	1.35818	0.0181086	0.554155
Zm00001eb169640	40.3469	34.1614	0.240089	0.040868	0.694099
Zm00001eb243480	47.5192	35.2863	0.4294	0.0397084	0.689437
Zm00001eb005930	155.169	111.053	0.482588	0.00578847	0.346389
Zm00001eb078010	24.7779	19.353	0.356493	0.014642	0.511337
Zm00001eb043360	4.83525	3.00709	0.685223	0.0137745	0.5079
Zm00001eb423540	96.9333	82.263	0.23675	0.0272751	0.620488
Zm00001eb229530	33.7136	28.0662	0.264497	0.0469151	0.726024
Zm00001eb015960	53.3448	41.7121	0.354882	0.0484212	0.732104
Zm00001eb357750	42.0927	34.1849	0.300209	0.0217521	0.579021
Zm00001eb316470	20.512	7.83103	1.3892	2.09075e-08	3.42453e-05
Zm00001eb112560	20.2139	15.9923	0.337964	0.0134805	0.505874
Zm00001eb202270	23.4578	13.0926	0.841315	0.0427267	0.701805
Zm00001eb375610	634.426	482.939	0.393611	0.0166472	0.533842
Zm00001eb313950	62.6895	50.618	0.308574	0.0340799	0.664706
Zm00001eb083180	2528.45	1431.95	0.82027	0.0142255	0.5079
Zm00001eb063330	12.08	6.16872	0.969581	0.0105518	0.465022
Zm00001eb416580	0.183709	0.0001	10.8432	0.0297805	1
Zm00001eb379310	80.7383	49.2712	0.712508	0.00021804	0.0531279
Zm00001eb101270	5.93224	4.47722	0.405974	0.0346797	0.666969
Zm00001eb042710	6.44412	4.67049	0.46441	0.0285944	0.627083
Zm00001eb405390	79.5336	66.7135	0.253584	0.00667828	0.370105
Zm00001eb256520	0.790213	0.280999	1.49168	0.0203	0.570139
Zm00001eb060890	1.30463	0.527753	1.30571	0.0480996	0.730788
Zm00001eb391400	45.1051	20.0289	1.17121	0.0039501	0.288985
Zm00001eb246950	5.82969	2.94931	0.983041	0.0247155	0.606622
Zm00001eb064400	73.7632	55.5014	0.410375	0.0265589	0.614238
Zm00001eb335060	17.2408	11.568	0.575683	0.0387202	0.682933
Zm00001eb430510	8.689	6.80872	0.351807	0.0469095	0.726024
Zm00001eb168720	15.9791	10.3364	0.628449	0.00808963	0.404783
Zm00001eb348110	3.95083	2.44478	0.69245	0.0117871	0.485142
Zm00001eb043280	3.95083	1.5596	1.34097	0.0497493	0.74122
Zm00001eb329520	25.4817	18.7938	0.439205	0.00393203	0.288378
Zm00001eb273970	2.09881	0.13593	3.94864	0.00287432	0.242124
Zm00001eb143540	83.4457	53.9557	0.62906	0.000297841	0.0631745
Zm00001eb061920	83.4422	63.3377	0.397712	0.000829139	0.120421
Zm00001eb107870	79.3156	60.2125	0.397541	0.0141911	0.5079
Zm00001eb351490	14.7036	12.2001	0.26928	0.0295672	0.633291
Zm00001eb304610	30.4758	23.555	0.371632	0.02647	0.614238
Zm00001eb165600	8.73646	4.64309	0.911965	7.24972e-06	0.00497078
Zm00001eb406650	6.12885	2.83474	1.1124	0.00219254	0.211943
Zm00001eb430750	48.844	32.2712	0.597933	0.0357528	0.673668
Zm00001eb113800	2.05953	0.937718	1.13509	0.0231935	0.591831
Zm00001eb193620	6.63971	4.45946	0.574251	0.00410759	0.297007
Zm00001eb299940	17.6183	11.6516	0.596548	0.0277352	0.627083
Zm00001eb312180	13.9594	10.0446	0.474814	0.0305136	0.643055
Zm00001eb127680	55.9897	44.5568	0.329515	0.00295166	0.245314
Zm00001eb129330	104	75.3004	0.465848	0.0189405	0.559543
Zm00001eb185610	49.4019	37.9544	0.3803	0.00852483	0.417504
Zm00001eb374630	62.5502	33.5505	0.898681	0.0449417	0.715588
Zm00001eb334560	240.091	181.705	0.401981	0.00891871	0.425813
Zm00001eb363230	0.654419	0.208552	1.64981	0.0264966	0.614238
Zm00001eb002380	3.3666	1.1739	1.51998	0.00745157	0.389331
Zm00001eb003030	21.1923	18.3162	0.210425	0.0470762	0.726024
Zm00001eb054160	51.4773	41.6286	0.306361	0.0252996	0.608547
Zm00001eb037570	302.054	234.484	0.365313	0.0272568	0.620488
Zm00001eb232160	10.6729	3.91555	1.44666	0.0441464	0.711188
Zm00001eb306790	25.479	16.1166	0.660764	9.71237e-05	0.0329138
Zm00001eb059940	151.963	70.4794	1.10845	0.000130257	0.0408549
Zm00001eb064870	42.2058	36.6512	0.203582	0.0400655	0.689684
Zm00001eb163080	26.7198	23.1095	0.209425	0.0433733	0.706505
Zm00001eb097350	0.769724	0.00337367	7.83388	0.00141934	0.164749
Zm00001eb191780	6.44214	3.47845	0.889096	0.0102311	0.460523
Zm00001eb264620	73.738	52.2966	0.495692	0.046407	0.726024
Zm00001eb067380	77.9749	24.2908	1.6826	0.000896424	0.126106
Zm00001eb390680	11.1156	8.5581	0.377218	0.0322192	0.655569
Zm00001eb290160	42.7261	20.9401	1.02885	0.00568198	0.344938
Zm00001eb280610	0.580327	0.172809	1.74769	0.0129033	0.499919
Zm00001eb116350	54.3422	43.9941	0.304764	0.0190747	0.56071
Zm00001eb218610	23.8348	14.7052	0.696747	0.00946194	0.441225
Zm00001eb107360	78.3181	59.3097	0.401077	0.039727	0.689437
Zm00001eb204770	5.5416	0.50848	3.44604	0.00551646	0.339544
Zm00001eb133610	0.262778	0.0001	11.3596	0.00131552	1
Zm00001eb318180	98.6504	82.2799	0.261786	0.0180928	0.554155
Zm00001eb372150	13.2259	12.7202	0.0562413	0.0488432	0.734021
Zm00001eb389990	14.2943	10.5201	0.442291	0.0484484	0.732139
Zm00001eb338000	2.13795	1.19556	0.838543	0.00994142	0.454437
Zm00001eb378720	40.0813	27.8534	0.525079	0.0150862	0.516524
Zm00001eb347530	97.924	67.7372	0.531714	0.0169718	0.536188
Zm00001eb245960	70.8019	50.1381	0.497883	0.0142502	0.5079
Zm00001eb060030	0.621306	0.0001	12.6011	0.000253906	0.0588059
Zm00001eb090840	0.302235	0.060573	2.31892	0.0470281	0.726024
Zm00001eb064640	22.881	16.7261	0.452047	0.00357765	0.274687
Zm00001eb302370	101.843	62.1374	0.71281	0.0452302	0.717333
Zm00001eb042610	23.6123	18.5644	0.347	0.00174036	0.184868
Zm00001eb297170	68.7986	48.2997	0.510366	0.0118061	0.485142
Zm00001eb221520	1.90914	0.397719	2.2631	0.00299615	0.24606
Zm00001eb142800	13.4894	8.86425	0.60575	0.0124049	0.495574
Zm00001eb327580	63.0507	45.366	0.474901	0.0159899	0.528454
Zm00001eb241220	0.480325	0.107407	2.16092	0.00705898	0.379873
Zm00001eb283600	8.00117	5.83244	0.456112	0.0112682	0.477054
Zm00001eb400840	3.04045	1.02008	1.57561	0.0465174	0.726024
Zm00001eb031880	4.45021	2.10072	1.08299	0.00176804	0.186835
Zm00001eb287600	236.87	163.99	0.530487	0.0109225	0.472184
Zm00001eb099290	11.9368	9.43736	0.338958	0.0343366	0.664898
Zm00001eb063240	7.13107	5.13079	0.474938	0.0285766	0.627083
Zm00001eb418870	41.8892	30.8698	0.440384	0.0208785	0.573339
Zm00001eb201770	104.097	74.7172	0.478419	0.0442874	0.711764
Zm00001eb073090	20.9766	13.3069	0.656615	0.000789545	0.118163
Zm00001eb303740	187.93	156.989	0.25953	0.0035207	0.27316
Zm00001eb021800	17.6813	13.527	0.386382	0.0380776	0.682302
Zm00001eb187670	25.5557	20.7296	0.301952	0.0430224	0.703901
Zm00001eb090110	89.6724	65.8332	0.445847	0.012774	0.499197
Zm00001eb350770	47.5058	22.181	1.09878	0.0127573	0.499197
Zm00001eb010620	39.5762	32.4284	0.287378	0.0201059	0.568024
Zm00001eb409890	12.9281	10.2869	0.329704	0.0164829	0.533441
Zm00001eb179330	67.8897	55.414	0.292941	0.0384229	0.682302
Zm00001eb303700	11.151	9.24029	0.271157	0.0415109	0.69508
Zm00001eb165570	46.5832	26.3704	0.820892	0.0479114	0.730011
Zm00001eb020180	24.3998	20.4874	0.252131	0.0441622	0.711188
Zm00001eb299450	2057.65	1328.76	0.630923	0.0294139	0.633291
Zm00001eb315220	8.56463	4.88506	0.810015	0.00665754	0.36965
Zm00001eb072690	17.452	8.78293	0.99062	0.0249654	0.608547
Zm00001eb141890	61.7208	50.9451	0.276813	0.00828921	0.410741
Zm00001eb147390	2.77073	1.86669	0.569781	0.0381872	0.682302
Zm00001eb194260	105.118	73.7132	0.512019	0.0130184	0.499919
Zm00001eb291130	42.9587	33.2508	0.36956	0.0201139	0.568024
Zm00001eb429250	0.0932697	0.0001	9.86526	0.00397935	1
Zm00001eb351780	30.1939	15.3425	0.97672	0.0290037	0.631082
Zm00001eb165770	18.307	15.3256	0.256459	0.0323227	0.655585
Zm00001eb409910	25.2184	15.5921	0.69366	0.0154422	0.522711
Zm00001eb178780	33.9817	26.1057	0.380389	0.0433219	0.706058
Zm00001eb400760	12.5295	9.55776	0.390583	0.0337571	0.663992
Zm00001eb127040	89.9847	68.2088	0.399723	0.00172896	0.184868
Zm00001eb345510	26.251	21.7556	0.27099	0.0142883	0.5079
Zm00001eb363340	27.4756	0.799961	5.10208	6.77627e-99	1.99785e-94
Zm00001eb260120	40.1323	29.1988	0.458853	0.0489328	0.734668
Zm00001eb393570	3.83815	2.3175	0.727841	0.0215208	0.578393
Zm00001eb107240	1.73932	0.88425	0.975997	0.0211639	0.576789
Zm00001eb100210	123.455	79.017	0.643747	0.000193165	0.0490956
Zm00001eb113440	3.92181	1.87863	1.06184	0.0412933	0.694099
Zm00001eb313490	32.5033	26.6482	0.286548	0.0383687	0.682302
Zm00001eb209920	62.881	43.538	0.53035	0.00585173	0.346439
Zm00001eb261600	0.808495	0.191282	2.07954	0.0373308	0.680172
Zm00001eb283680	0.988091	0.17854	2.4684	0.0145954	0.511065
Zm00001eb159650	3.41942	1.36414	1.32576	0.0202572	0.570139
Zm00001eb258140	37.7061	23.7644	0.665996	0.0418445	0.69622
Zm00001eb007060	29.8216	18.7437	0.669949	0.0404168	0.690387
Zm00001eb190090	1.74781	0.732779	1.2541	0.00450992	0.307791
Zm00001eb366250	39.2155	33.2726	0.237088	0.0231676	0.591831
Zm00001eb130750	39.8989	29.1585	0.452429	0.0167842	0.536172
Zm00001eb425200	0.601182	0.0001	12.5536	0.0209084	1
Zm00001eb289000	15.989	9.25505	0.788765	0.000177883	0.046826
Zm00001eb078020	0.747281	0.161098	2.21371	0.0167855	0.536172
Zm00001eb344930	0.755623	0.323068	1.22583	0.019797	0.567776
Zm00001eb182650	15.3376	6.54865	1.2278	9.42619e-07	0.000926374
Zm00001eb186540	8.7447	6.29835	0.473435	0.008791	0.425351
Zm00001eb322830	0.168476	0.0141987	3.56872	0.0195942	0.566175
Zm00001eb184160	53.0049	45.1385	0.231768	0.0486227	0.732754
Zm00001eb393080	51.991	42.6158	0.286875	0.0120727	0.490386
Zm00001eb252000	23.1572	16.5085	0.488247	0.000692912	0.10737
Zm00001eb431510	163.07	139.496	0.22527	0.0490041	0.734886
Zm00001eb386220	145.263	116.517	0.31813	0.0464778	0.726024
Zm00001eb277370	236.183	120.37	0.97243	0.0354669	0.671722
Zm00001eb084370	90.429	45.2588	0.998588	0.00517133	0.332171
Zm00001eb426760	5.96139	4.14235	0.525199	0.0381721	0.682302
Zm00001eb374230	18.6389	4.4929	2.0526	1.72264e-05	0.00976705
Zm00001eb131130	110.437	76.9211	0.521774	0.00922834	0.436724
Zm00001eb344080	0.190068	0.0001	10.8923	0.0241812	0.602649
Zm00001eb192480	23.9213	6.47243	1.88592	6.93806e-07	0.000757611
Zm00001eb188280	3.83263	2.23323	0.779205	0.010502	0.463677
Zm00001eb409990	1.40928	0.206558	2.77033	0.00810032	0.404783
Zm00001eb060840	2.66601	1.16928	1.18906	0.00999725	0.455562
Zm00001eb327030	71.0555	51.0685	0.476512	0.0065743	0.367369
Zm00001eb128840	1.0951	0.51836	1.07903	0.03792	0.681504
Zm00001eb370910	105.474	91.9621	0.197776	0.035805	0.673668
Zm00001eb365850	2.99619	1.77799	0.752877	0.024419	0.603599
Zm00001eb407710	7374.08	5095.88	0.533132	0.00160128	0.179507
Zm00001eb041120	514.816	386.018	0.41539	0.0211141	0.576422
Zm00001eb030170	9.39744	4.68993	1.0027	0.00349953	0.272954
Zm00001eb273940	63.6701	40.6665	0.646776	3.00562e-05	0.0155464
Zm00001eb076220	0.115315	0.0001	10.1714	0.00429893	1
Zm00001eb023420	57.9226	23.6954	1.28952	0.00225518	0.214913
Zm00001eb413690	16.2121	12.7974	0.341213	0.0056777	0.344938
Zm00001eb415960	170.766	115.856	0.559685	0.0481802	0.730788
Zm00001eb188580	6.97806	4.7892	0.543041	0.025303	0.608547
Zm00001eb227490	0.708036	0.0234027	4.91908	0.0112941	0.477054
Zm00001eb360250	104.621	72.9654	0.519886	0.0286072	0.627083
Zm00001eb050320	10.292	7.09413	0.536826	0.0383404	0.682302
Zm00001eb273090	22.8653	19.1517	0.255684	0.0425411	0.701805
Zm00001eb111650	54.4535	45.316	0.265004	0.0142286	0.5079
Zm00001eb156290	1.25352	0.581603	1.10787	0.0217491	0.579021
Zm00001eb331830	4.31164	1.10668	1.96199	0.034816	0.668175
Zm00001eb157980	9.71922	5.87501	0.726248	0.0137294	0.5079
Zm00001eb256650	55.8538	22.3968	1.31837	0.00655159	0.367369
Zm00001eb206010	85.5383	71.4851	0.258928	0.0206743	0.572416
Zm00001eb284890	1.54394	0.745573	1.0502	0.0108395	0.470663
Zm00001eb212450	2.5339	0.994226	1.34971	0.000826022	0.120421
Zm00001eb137380	89.1586	38.5008	1.21149	0.014311	0.5079
Zm00001eb266550	0.579063	0.0324963	4.15537	0.00578761	0.346389
Zm00001eb081210	7.30807	3.55754	1.03861	0.0442215	0.711672
Zm00001eb139740	45.5471	31.3143	0.540537	0.014874	0.512499
Zm00001eb108760	0.993934	0.325601	1.61004	0.0184453	0.556845
Zm00001eb030510	0.296935	0.0131387	4.49825	0.0352868	0.670767
Zm00001eb396480	26.2146	16.7833	0.643344	0.0360263	0.674389
Zm00001eb053860	36.8692	27.86	0.40422	0.025546	0.610666
Zm00001eb413920	3.57127	1.11891	1.67434	0.000576942	0.0966477
Zm00001eb126790	91.4558	77.474	0.239363	0.0460278	0.723368
Zm00001eb279100	8.58759	5.90954	0.539208	0.00202735	0.204002
Zm00001eb261380	6.70098	4.09119	0.711852	0.0418373	0.69622
Zm00001eb005370	14.3501	9.86388	0.540838	0.0241312	0.602624
Zm00001eb365690	44.6935	34.2681	0.383197	0.000118216	0.0383007
Zm00001eb276540	1.05111	0.40045	1.39222	0.000207708	0.0515081
Zm00001eb237060	2.30685	1.51344	0.608089	0.0252506	0.608547
Zm00001eb172500	10.7798	6.84086	0.656082	0.00470796	0.314365
Zm00001eb408210	43.5562	32.2093	0.435401	0.0143562	0.5079
Zm00001eb297100	31.6729	21.4595	0.56163	0.032281	0.655585
Zm00001eb352190	43.7592	27.2219	0.684818	0.000786319	0.118163
Zm00001eb250340	33.8141	24.7319	0.451255	0.0421454	0.697682
Zm00001eb218160	0.847258	0.188168	2.17078	0.000590454	0.0977997
Zm00001eb351150	43.6192	32.9454	0.404889	0.000275048	0.0609717
Zm00001eb332030	44.1132	36.2142	0.284653	0.0164633	0.533441
Zm00001eb356270	7.89087	5.15429	0.614411	0.000492476	0.0874679
Zm00001eb394220	31.6656	21.6576	0.548041	0.0157759	0.527377
Zm00001eb311610	9.27829	6.89597	0.428106	0.0119947	0.48943
Zm00001eb136910	0.119857	0.0001	10.2271	0.00379208	1
Zm00001eb196160	32.0951	19.1674	0.743695	0.00339299	0.268306
Zm00001eb002020	4.31904	3.28587	0.394434	0.00339443	0.268306
Zm00001eb204830	2.30488	1.14224	1.01283	0.0221985	0.58357
Zm00001eb006300	48.7852	32.5952	0.581782	0.0151334	0.516836
Zm00001eb418150	17.6201	10.4409	0.754974	0.0268032	0.615595
Zm00001eb240660	51.2334	43.3338	0.241594	0.0391099	0.68432
Zm00001eb418840	2.60318	1.40554	0.889148	0.00830968	0.411064
Zm00001eb133930	38.3712	30.6297	0.325095	0.00467195	0.313766
Zm00001eb103730	53.235	42.4134	0.327854	0.0370229	0.678618
Zm00001eb308660	11.7784	8.69172	0.438424	0.00385254	0.287925
Zm00001eb222940	21.849	16.4035	0.413564	0.0223449	0.584555
Zm00001eb300910	9.03263	7.72003	0.226541	0.0355134	0.671722
Zm00001eb162780	53.9338	40.0869	0.428059	0.0344855	0.665
Zm00001eb183820	0.375468	0.056983	2.72009	0.00561193	0.343887
Zm00001eb242200	6.78623	2.69861	1.3304	0.0399979	0.689684
Zm00001eb316200	1.76608	0.431194	2.03414	0.0450418	0.715885
Zm00001eb071250	36.2889	20.2728	0.839984	4.10839e-07	0.000484511
Zm00001eb158780	29.0971	23.9391	0.281507	0.0264408	0.614238
Zm00001eb011260	0.280116	0.0001	11.4518	0.00493731	0.322889
Zm00001eb324610	3.01961	1.05074	1.52295	0.0387227	0.682933
Zm00001eb150370	53.3653	43.0723	0.30914	0.00602664	0.352547
Zm00001eb020170	267.641	204.668	0.38701	0.0150534	0.516071
Zm00001eb201880	15.5846	8.8059	0.823579	0.000994526	0.13328
Zm00001eb206350	37.2883	23.2356	0.682385	0.0148534	0.512499
Zm00001eb054130	25.5074	19.1209	0.415767	0.0304335	0.642061
Zm00001eb171120	33.8057	17.9429	0.913854	0.0194441	0.565915
Zm00001eb328320	36.3896	29.5909	0.298373	0.0270672	0.619103
Zm00001eb145720	12.534	7.24685	0.790425	0.0212751	0.576789
Zm00001eb003450	7.9604	4.45811	0.836408	0.0206923	0.572416
Zm00001eb199060	27.454	18.0288	0.606716	0.018535	0.556845
Zm00001eb005850	38.2297	25.6791	0.574101	0.00111248	0.141988
Zm00001eb337620	0.253433	0.0136083	4.21904	0.00483365	0.320244
Zm00001eb142140	8.48394	2.89945	1.54896	1.35454e-06	0.00117459
Zm00001eb306890	3.46962	2.03794	0.767665	0.0164919	0.533441
Zm00001eb359740	30.0663	25.5598	0.234267	0.034505	0.665
Zm00001eb022380	23.05	16.8211	0.454495	0.0241388	0.602624
Zm00001eb015770	6.53146	3.843	0.765174	0.0422087	0.697947
Zm00001eb253110	357.781	273.405	0.388038	0.0343691	0.664898
Zm00001eb146750	6.25631	4.02618	0.635901	0.038894	0.683722
Zm00001eb368040	5.6052	3.64656	0.620229	0.00870095	0.422619
Zm00001eb354490	22.3363	11.6738	0.93612	0.0104136	0.462622
Zm00001eb330380	195.844	166.931	0.230452	0.0491192	0.735864
Zm00001eb381760	15.0684	10.9086	0.46606	0.0450307	0.715885
Zm00001eb202480	3.40945	1.62439	1.06964	0.025254	0.608547
Zm00001eb388330	0.186908	0.0588607	1.66695	0.0328881	0.658282
Zm00001eb003820	2425.11	1283.19	0.918315	0.0165701	0.533441
Zm00001eb315140	0.368154	0.0867613	2.08519	0.023556	0.597163
Zm00001eb316490	174.109	106.101	0.714547	0.0397691	0.689437
Zm00001eb165580	141.634	83.8416	0.756428	0.0175466	0.542121
Zm00001eb255870	3.46017	2.34003	0.564314	0.0314748	0.653041
Zm00001eb121310	188.685	156.528	0.269559	0.0156634	0.525374
Zm00001eb349920	47.9419	33.461	0.518808	0.0315752	0.653151
Zm00001eb002830	54.4013	42.3443	0.361473	0.0289367	0.630555
Zm00001eb381880	15.2125	8.84167	0.782865	0.0112295	0.477054
Zm00001eb137370	753.464	415.312	0.859344	0.0330009	0.658282
Zm00001eb122500	89.2853	63.0189	0.502637	0.0290794	0.632123
Zm00001eb229790	74.1204	61.3673	0.272401	0.00335987	0.267727
Zm00001eb116580	32.2534	20.4201	0.659462	0.0182774	0.556845
Zm00001eb186820	94.1322	80.4665	0.2263	0.0315908	0.653151
Zm00001eb104140	4.41441	1.61715	1.44877	0.000206048	0.0515081
Zm00001eb127810	0.39143	0.0001	11.9345	0.0297287	1
Zm00001eb325280	1.52751	0.856108	0.835315	0.0170298	0.536188
Zm00001eb350590	39.0148	26.9754	0.532378	0.0230095	0.591151
Zm00001eb155120	16.4279	11.6274	0.498625	0.0472355	0.726024
Zm00001eb052790	706.978	515.84	0.454741	0.00835677	0.412701
Zm00001eb338790	22.6805	8.90454	1.34884	0.00760296	0.394295
Zm00001eb207770	13.7004	8.11929	0.754791	0.0165266	0.533441
Zm00001eb285950	81.8861	66.4257	0.301876	0.00892557	0.425813
Zm00001eb167820	129.808	106.567	0.28462	0.0369276	0.678618
Zm00001eb090230	173.118	109.159	0.665325	8.11332e-05	0.0299006
Zm00001eb075210	32.2053	24.4254	0.398915	0.00206548	0.206086
Zm00001eb302940	35.2168	25.4072	0.471026	0.00618849	0.357623
Zm00001eb037710	3.26269	1.564	1.06082	0.0057054	0.344938
Zm00001eb234840	12.1746	9.02653	0.431631	0.0367074	0.677249
Zm00001eb036990	3.40565	1.92077	0.826247	0.00979318	0.45044
Zm00001eb275420	40.2738	20.8257	0.951476	0.041211	0.694099
Zm00001eb139870	1.04954	0.449247	1.22418	0.042639	0.701805
Zm00001eb107810	82.0058	53.6214	0.612918	0.0117118	0.483612
Zm00001eb023160	36.9594	26.1106	0.501302	0.0328464	0.658282
Zm00001eb154860	33.5802	27.9484	0.264841	0.0444658	0.713267
Zm00001eb408790	95.4194	75.0308	0.3468	0.03747	0.680301
Zm00001eb062510	416.571	295.624	0.494799	0.014039	0.5079
Zm00001eb271430	8.97447	5.40554	0.731387	0.0264851	0.614238
Zm00001eb432570	81.355	51.6073	0.656656	0.0138964	0.5079
Zm00001eb037860	13.0295	7.54413	0.788355	0.0174836	0.542121
Zm00001eb279500	0.756448	0.122918	2.62155	0.0163837	0.533441
Zm00001eb288580	4.74249	2.99504	0.663071	0.000695576	0.10737
Zm00001eb092280	25.2066	16.8454	0.581449	0.0253185	0.608547
Zm00001eb061470	56.6051	42.0975	0.427197	0.000382013	0.0755898
Zm00001eb340330	13.3194	9.41798	0.500044	0.0269979	0.618376
Zm00001eb410510	71.5882	58.1365	0.300279	0.0377765	0.681384
Zm00001eb267560	10.8933	5.90123	0.88435	0.0143672	0.5079
Zm00001eb349490	41.7648	24.7453	0.755135	0.0339562	0.664706
Zm00001eb413370	422.655	367.045	0.203522	0.0280844	0.627083
Zm00001eb395510	53.7306	35.774	0.586832	0.0285951	0.627083
Zm00001eb390740	0.382572	0.0001	11.9015	0.034181	0.664706
Zm00001eb426280	92.4425	43.1927	1.09777	0.00328378	0.264524
Zm00001eb222500	3.41411	1.47184	1.21389	0.00272584	0.237351
Zm00001eb414980	4.08557	2.58389	0.660994	0.020767	0.572416
Zm00001eb295010	4.2841	3.31214	0.371228	0.035766	0.673668
Zm00001eb111990	56.3832	42.6543	0.402576	0.00644068	0.362947
Zm00001eb393580	4.38527	2.62953	0.737863	0.0214283	0.576961
Zm00001eb189050	80.3997	63.2058	0.347135	0.0110417	0.47594
Zm00001eb325330	66.0525	42.9681	0.620348	0.0391841	0.684805
Zm00001eb001180	5.46915	3.80013	0.525265	0.00236207	0.21831
Zm00001eb388610	39.6028	33.9558	0.221944	0.0387892	0.682933
Zm00001eb161620	8.24192	4.93445	0.740092	0.0124229	0.49562
Zm00001eb198130	1.72364	0.658513	1.38817	0.0390418	0.68432
Zm00001eb230750	58.3012	48.8733	0.25448	0.0213703	0.576961
Zm00001eb328250	14.4025	11.152	0.369015	0.0347851	0.668175
Zm00001eb177310	81.7759	62.3862	0.390448	0.012101	0.490748
Zm00001eb366380	7.91619	6.21711	0.348563	0.00436604	0.304494
Zm00001eb373490	21.2438	14.0594	0.595509	0.0307804	0.647288
Zm00001eb420230	3.21369	2.28431	0.492474	0.0147595	0.511346
Zm00001eb342980	74.9831	48.4106	0.631244	0.0162322	0.531159
Zm00001eb396960	7.12787	4.52573	0.655321	0.0487452	0.733242
Zm00001eb013100	28.0728	20.28	0.46912	0.0405683	0.691387
Zm00001eb095930	34.5575	28.7297	0.266454	0.0158125	0.527377
Zm00001eb285790	35.289	25.6526	0.460116	0.0361631	0.674655
Zm00001eb124960	6.8679	3.73304	0.879519	0.0185164	0.556845
Zm00001eb388790	39.0956	32.3406	0.273661	0.0280036	0.627083
Zm00001eb277260	224.816	164.27	0.452678	0.000474339	0.0855892
Zm00001eb375850	35.8522	12.8084	1.48497	0.00470942	0.314365
Zm00001eb361640	90.8885	59.362	0.614557	0.00198172	0.20078
Zm00001eb293370	53.5034	45.3203	0.239474	0.0312037	0.653001
Zm00001eb410170	428.48	349.941	0.292116	0.023156	0.591831
Zm00001eb257060	82.644	71.4066	0.210854	0.0482525	0.730788
Zm00001eb034370	0.0614667	0.0001	9.26366	0.00438216	1
Zm00001eb334780	12.0682	9.83995	0.294483	0.0472452	0.726024
Zm00001eb357850	68.0927	43.6457	0.64166	0.000735517	0.11178
Zm00001eb158810	24.6544	12.9272	0.931432	0.0351126	0.670051
Zm00001eb374610	1.31134	0.501134	1.38778	0.00185113	0.19336
Zm00001eb170290	68.3625	26.2166	1.38273	0.000100054	0.0335213
Zm00001eb372610	1.60979	0.636603	1.3384	0.0440348	0.710217
Zm00001eb010040	209.989	168.398	0.318438	0.0251126	0.608547
Zm00001eb280430	2.0957	1.25685	0.737621	0.0374517	0.680301
Zm00001eb155070	131.641	106.159	0.310385	0.0295595	0.633291
Zm00001eb432030	2.1156	1.06401	0.991553	0.00456246	0.310658
Zm00001eb429920	54.6368	40.3571	0.437051	0.0217404	0.579021
Zm00001eb066380	10.2363	5.18912	0.980132	0.0285537	0.627083
Zm00001eb020680	369.057	312.248	0.241154	0.015883	0.527626
Zm00001eb307020	2.95155	1.80224	0.711679	0.00582871	0.346389
Zm00001eb142790	35.0192	24.6486	0.506638	0.00921663	0.436724
Zm00001eb072340	1.33563	0.271075	2.30076	0.009294	0.437723
Zm00001eb016270	24.2983	6.37952	1.92934	0.00210301	0.207599
Zm00001eb215260	3.99993	1.74247	1.19884	0.0413855	0.694857
Zm00001eb368000	27.7816	18.5191	0.585113	0.0183459	0.556845
Zm00001eb077580	22.2113	9.87818	1.16898	2.70897e-05	0.0142622
Zm00001eb331930	24.4443	12.0851	1.01627	0.000652676	0.102903
Zm00001eb414630	15.4642	9.09621	0.765591	0.0460672	0.723601
Zm00001eb205600	56.004	25.5182	1.134	0.0350606	0.669924
Zm00001eb287550	229.446	187.763	0.289242	0.0303089	0.641732
Zm00001eb331210	46.4098	24.0122	0.950664	0.00332071	0.26677
Zm00001eb042400	121.794	90.8596	0.422731	0.0103307	0.461484
Zm00001eb131640	1.60389	0.266219	2.59089	0.0388602	0.683602
Zm00001eb376380	4.35596	2.7092	0.685125	0.0275112	0.624414
Zm00001eb259960	72.2567	53.4794	0.434149	0.0123124	0.493987
Zm00001eb162210	480.071	328.017	0.54948	0.0487388	0.733242
Zm00001eb050290	18.7195	14.022	0.416851	0.00211069	0.207599
Zm00001eb375730	185.851	151.967	0.290393	0.046987	0.726024
Zm00001eb362330	108.891	94.4714	0.204934	0.0277673	0.627083
Zm00001eb175890	70.718	45.2572	0.643932	0.000182484	0.0473851
Zm00001eb214670	121.554	80.9044	0.587311	0.0315852	0.653151
Zm00001eb305940	23.6346	20.5851	0.199297	0.0419345	0.696538
Zm00001eb412910	24.387	18.6743	0.385059	0.000390954	0.0768433
Zm00001eb172210	0.344377	0.0001	11.7498	0.00205497	1
Zm00001eb426620	33.1518	27.8111	0.253431	0.0457594	0.720782
Zm00001eb203110	10.5501	8.00989	0.397397	0.0352184	0.670297
Zm00001eb322130	58.828	42.998	0.452234	0.00729031	0.386583
Zm00001eb059240	9.37761	5.41439	0.79242	0.00498107	0.324187
Zm00001eb345400	27.503	20.2764	0.439788	0.0147961	0.511889
Zm00001eb037690	228.43	155.795	0.552102	0.00228074	0.214913
Zm00001eb367140	8.80916	5.1578	0.772248	0.0205552	0.572416
Zm00001eb270600	0.575204	0.0001	12.4899	0.00225413	0.214913
Zm00001eb142710	101.757	90.2216	0.17359	0.0323444	0.655585
Zm00001eb236480	0.960702	0.178102	2.43139	0.0338043	0.663992
Zm00001eb138950	6.34041	4.61009	0.45978	0.0324696	0.656774
Zm00001eb386000	33.1836	26.3519	0.332564	0.0436602	0.70805
Zm00001eb037740	10.6822	8.8129	0.277517	0.0318993	0.654479
Zm00001eb306770	0.389349	0.0001	11.9268	0.00211508	0.207599
Zm00001eb110020	29.7359	22.95	0.373713	0.0156015	0.524853
Zm00001eb263170	6.52931	4.43584	0.557721	0.0308309	0.647888
Zm00001eb219720	3.02176	1.84297	0.713355	0.0196701	0.566175
Zm00001eb351800	1.6742	0.784228	1.09413	0.0344162	0.664898
Zm00001eb169620	314.591	248.167	0.342169	0.000126462	0.0400911
Zm00001eb354610	16.3434	11.7608	0.474724	0.000451515	0.0832001
Zm00001eb193240	11.3453	6.0085	0.917013	0.00740417	0.389331
Zm00001eb272100	29.8975	25.5964	0.224087	0.0486382	0.732754
Zm00001eb251550	21.0659	18.2206	0.209339	0.0435722	0.7074
Zm00001eb285900	55.8835	42.6249	0.390726	0.0294728	0.633291
Zm00001eb091110	107.992	57.6125	0.906477	0.0416817	0.69508
Zm00001eb004150	16.9542	7.30951	1.2138	0.00295365	0.245314
Zm00001eb265650	161.711	139.639	0.211713	0.0242052	0.602737
Zm00001eb068360	0.312812	0.0001	11.6111	0.0485569	1
Zm00001eb363100	8.7876	6.04578	0.53954	0.00708374	0.379873
Zm00001eb089930	17.6717	7.33852	1.26788	0.0147564	0.511346
Zm00001eb172290	18.4259	14.9081	0.305639	0.0200873	0.568024
Zm00001eb211100	67.4382	46.5416	0.535043	0.00411448	0.297007
Zm00001eb313700	38.7618	24.5734	0.65754	0.000171572	0.045986
Zm00001eb353760	95.6662	67.1127	0.511423	0.0240196	0.602624
Zm00001eb335430	0.166293	0.0001	10.6995	0.0384632	1
Zm00001eb028760	56.1071	45.0964	0.315171	0.0131201	0.501714
Zm00001eb315610	4.81597	3.71796	0.373314	0.0379673	0.681504
Zm00001eb005900	28.8097	18.549	0.635212	0.0218262	0.579021
Zm00001eb379530	43.1101	33.8368	0.349434	0.0138243	0.5079
Zm00001eb278680	11.2102	5.69987	0.975805	0.00803332	0.403833
Zm00001eb380630	9.42866	7.72793	0.28697	0.0259635	0.614238
Zm00001eb392430	41.7341	34.7225	0.265354	0.0499209	0.74122
Zm00001eb078000	8.99931	6.45777	0.478778	0.0159044	0.527626
Zm00001eb109130	1.23732	0.753005	0.716487	0.0472108	0.726024
Zm00001eb380880	25.6087	19.1655	0.418123	0.0106968	0.469305
Zm00001eb148420	4.5472	1.63931	1.47188	4.04324e-05	0.0180616
Zm00001eb031100	1.33474	0.568887	1.23035	0.0106915	0.469305
Zm00001eb168890	11.4967	8.87239	0.373829	0.0468524	0.726024
Zm00001eb293070	66.5951	40.2882	0.725059	0.00390005	0.287925
Zm00001eb130530	5.02367	2.54115	0.983263	0.00510478	0.329609
Zm00001eb246210	161.898	110.772	0.547492	0.0227991	0.590774
Zm00001eb372950	54.771	32.207	0.766037	0.00674556	0.371737
Zm00001eb032630	158.335	130.807	0.275537	0.0217631	0.579021
Zm00001eb064750	47.5367	32.0706	0.567792	0.0170588	0.536188
Zm00001eb186310	12.9626	9.10144	0.510185	0.0174652	0.542121
Zm00001eb397770	20.1708	15.8473	0.348033	0.00623854	0.35924
Zm00001eb162980	0.951207	0.0001	13.2155	2.13468e-09	5.72153e-06
Zm00001eb392850	1.05084	0.189412	2.47194	8.45894e-07	0.000859983
Zm00001eb220110	43.6008	33.7283	0.370395	0.0143438	0.5079
Zm00001eb097730	17.65	11.7747	0.58398	0.0252065	0.608547
Zm00001eb374760	9.65611	7.5452	0.355883	0.0351831	0.670297
Zm00001eb385100	45.4271	24.8612	0.869658	0.0028617	0.241752
Zm00001eb100060	27.8056	21.9092	0.343839	0.00927262	0.437723
Zm00001eb163040	0.210066	0.0191327	3.45674	0.0344318	1
Zm00001eb099920	84.6745	56.7354	0.577677	0.0409728	0.694099
Zm00001eb265510	59.1045	45.2897	0.384083	0.0291004	0.632123
Zm00001eb103540	8.64193	6.71	0.365039	0.0261289	0.614238
Zm00001eb408140	36.0364	22.6155	0.672142	0.0259882	0.614238
Zm00001eb361630	3.33277	0.0001	15.0244	2.02357e-10	8.52297e-07
Zm00001eb266860	4.70367	2.69695	0.802459	0.0384699	0.682302
Zm00001eb159850	87.5012	39.5524	1.14554	1.05689e-10	5.19336e-07
Zm00001eb198730	32.6263	21.5678	0.597153	0.0497889	0.74122
Zm00001eb289310	23.7853	15.9735	0.574389	0.00150051	0.172139
Zm00001eb130130	34.1203	28.75	0.247065	0.0199994	0.568024
Zm00001eb280950	258.475	179.047	0.529692	0.018678	0.557149
Zm00001eb239300	110.766	83.9543	0.399843	0.0496976	0.74114
Zm00001eb069110	7.91567	5.04864	0.648816	0.00344305	0.270697
Zm00001eb145660	15.2924	12.2126	0.324451	0.0239228	0.602319
Zm00001eb004550	101.985	76.0337	0.42365	0.00425665	0.30168
Zm00001eb039650	246.49	142.885	0.786677	4.69347e-05	0.0197836
Zm00001eb123520	6.61202	4.78496	0.466583	0.0159644	0.528259
Zm00001eb064840	38.4457	27.4307	0.48703	0.0043324	0.304124
Zm00001eb244440	8.48999	4.10711	1.04764	0.037856	0.681384
Zm00001eb011560	17.1312	8.68992	0.979213	0.0127703	0.499197
Zm00001eb073260	17.2865	10.386	0.73501	0.0355002	0.671722
Zm00001eb344530	5.33717	2.91666	0.871756	0.027418	0.622776
Zm00001eb340440	179.899	129.684	0.472179	0.00812694	0.404981
Zm00001eb068160	14.2154	11.4828	0.307981	0.0285927	0.627083
Zm00001eb111430	90.8689	69.9969	0.376496	0.0476327	0.727645
Zm00001eb032800	50.5488	43.2331	0.225539	0.0232533	0.591831
Zm00001eb413110	25.843	19.6564	0.394775	0.00439252	0.304494
Zm00001eb396930	0.793632	0.313722	1.33898	0.0498856	0.74122
Zm00001eb085360	13.9049	8.92248	0.640079	0.00774227	0.397497
Zm00001eb045340	14.9898	10.7125	0.484681	0.0206902	0.572416
Zm00001eb282590	415.799	367.682	0.177431	0.0468177	0.726024
Zm00001eb254430	65.3043	52.4449	0.316376	0.0425985	0.701805
Zm00001eb176770	13.2136	9.99342	0.40297	0.0201117	0.568024
Zm00001eb159580	32.8619	23.071	0.510337	0.00136116	0.161819
Zm00001eb077550	62.0432	51.5661	0.26685	0.0142741	0.5079
Zm00001eb245970	15.2168	8.15305	0.900255	0.00186906	0.194034
Zm00001eb110620	4.15398	1.08169	1.9412	0.0134511	0.505874
Zm00001eb111570	36.6536	24.1303	0.603106	0.000467017	0.0855222
Zm00001eb064650	37.1255	26.0597	0.510588	0.000476215	0.0855892
Zm00001eb220550	27.8901	20.3473	0.45491	0.0121968	0.493276
Zm00001eb255120	0.500164	0.043418	3.52604	0.0141116	0.5079
Zm00001eb190340	523.479	347.384	0.5916	0.0175047	0.542121
Zm00001eb382310	5.97684	2.74573	1.12219	0.0312391	0.653001
Zm00001eb064350	29.2382	18.9083	0.628836	0.00979013	0.45044
Zm00001eb092750	6.50301	1.65488	1.97438	0.00627062	0.359595
Zm00001eb122430	1.27727	0.236068	2.4358	0.0384616	0.682302
Zm00001eb241920	242.031	178.303	0.440867	0.00534049	0.337321
Zm00001eb125310	2.55118	1.24192	1.03859	0.00939374	0.440113
Zm00001eb386550	75.5096	40.3617	0.903675	0.00448659	0.307212
Zm00001eb000150	1.10957	0.238606	2.2173	0.0186287	0.556845
Zm00001eb176840	6.19039	4.6153	0.423606	0.029589	0.633291
Zm00001eb112620	1.22922	0.170078	2.85348	0.0298096	0.634569
Zm00001eb074680	47.472	32.7577	0.535243	0.00619833	0.357623
Zm00001eb277600	4.81532	2.67292	0.849214	0.0148099	0.511889
Zm00001eb347790	0.165558	0.00337667	5.61559	0.00421438	0.299635
Zm00001eb250900	22.0806	11.5359	0.936652	4.96552e-05	0.0197836
Zm00001eb393070	225.066	181.796	0.308028	0.00969697	0.448112
Zm00001eb047630	17.2225	13.3423	0.368291	0.042479	0.701805
Zm00001eb165560	114.372	67.1828	0.767566	0.0189633	0.559655
Zm00001eb137050	341.355	159.239	1.10008	0.00839764	0.414026
Zm00001eb426920	6.96915	4.70095	0.568031	0.0185136	0.556845
Zm00001eb299460	486.949	283.479	0.780531	0.0272559	0.620488
Zm00001eb208140	75.2602	65.4376	0.201766	0.0341158	0.664706
Zm00001eb215010	29.8596	22.7624	0.391541	0.0135084	0.505874
Zm00001eb093560	35.4349	28.1666	0.331188	0.0415395	0.69508
Zm00001eb099490	15.7908	13.0095	0.279525	0.0272349	0.620488
Zm00001eb023880	144.426	114.653	0.333058	0.0203346	0.570433
Zm00001eb324630	95.6609	73.8	0.374308	0.0108233	0.470652
Zm00001eb358740	3.33457	1.97188	0.757929	0.0181191	0.554155
Zm00001eb123400	0.537445	0.106514	2.33508	0.0401516	0.689684
Zm00001eb393670	41.6884	30.7822	0.437547	0.013417	0.505848
Zm00001eb352260	18.6654	15.6062	0.25825	0.0360766	0.674655
Zm00001eb360070	250.901	215.48	0.219566	0.0273961	0.62276
Zm00001eb011730	13.2727	10.177	0.383149	0.022897	0.591151
Zm00001eb389900	20	16.7905	0.252357	0.0364757	0.676433
Zm00001eb198020	78.5399	45.4267	0.789885	0.00938476	0.440113
Zm00001eb003470	40.882	27.2683	0.584244	0.0403451	0.6902
Zm00001eb337640	106.903	70.7788	0.594915	0.0341558	0.664706
Zm00001eb090830	1745.81	1139.93	0.614949	0.00133674	0.160208
Zm00001eb340560	0.432089	0.0001	12.0771	0.00234488	0.217402
Zm00001eb160370	0.677766	0.196025	1.78975	0.0257459	0.61215
Zm00001eb376160	53.8912	40.2857	0.419785	0.031232	0.653001
Zm00001eb398650	0.26384	0.0001	11.3654	0.0458358	1
Zm00001eb432710	49.1264	36.6525	0.422587	0.0276285	0.626111
Zm00001eb055320	104.641	81.0178	0.36913	0.0400442	0.689684
Zm00001eb314860	28.1042	22.9221	0.294048	0.00801859	0.403833
Zm00001eb147300	1.52253	0.0001	13.8942	1.12504e-11	6.63394e-08
Zm00001eb242930	6.74863	4.64566	0.538712	0.0421386	0.697682
Zm00001eb014090	20.3553	15.3303	0.409015	0.0173545	0.540848
Zm00001eb161720	11.1535	5.35943	1.05735	0.00630638	0.360331
Zm00001eb398410	3.26752	1.26208	1.37239	0.000138185	0.0420012
Zm00001eb286740	6.26601	4.59457	0.447616	0.000941214	0.130895
Zm00001eb102480	10.2704	7.56024	0.441986	0.0354709	0.671722
Zm00001eb316800	20.5291	15.4586	0.409261	0.0241393	0.602624
Zm00001eb250980	1.96382	0.734576	1.41868	0.0268095	0.615595
Zm00001eb015430	6.74614	4.70189	0.520823	0.0360163	0.674389
Zm00001eb316940	96.8108	54.6972	0.823702	0.0421096	0.697682
Zm00001eb386210	123.129	64.5189	0.932372	0.040274	0.6902
Zm00001eb291970	21.8203	17.5086	0.317608	0.0454162	0.718145
Zm00001eb167530	110.247	72.9939	0.594885	0.0362289	0.675181
Zm00001eb084940	18.6238	14.7884	0.332674	0.0165484	0.533441
Zm00001eb048110	47.5757	12.5116	1.92695	0.00108555	0.13987

## Sheet: 6 mM K_AMF vs 6 mM K_NM
Gene id	MeanTPM (6 mM K_AMF)	MeanTPM (6 mM K_NM)	log2FoldChange	pValue	qValue
Zm00001eb343690	77.1567	57.3237	0.42866	0.00882694	0.193084
Zm00001eb092070	103.206	40.4932	1.34977	0.00254649	0.0819003
Zm00001eb361030	21.8955	16.8899	0.374472	0.0173623	0.291972
Zm00001eb192490	208.809	98.11	1.08971	1.89771e-10	1.30609e-07
Zm00001eb410050	38.4933	25.6741	0.58429	0.0443285	0.491884
Zm00001eb118280	35.0302	20.238	0.791529	0.00203015	0.0694383
Zm00001eb118270	34.5371	19.933	0.792986	0.0019919	0.0683787
Zm00001eb430610	19.8843	12.4659	0.673646	0.00651017	0.154808
Zm00001eb369450	1.50804	0.0001	13.8804	0.0262122	1
Zm00001eb316100	22.5268	17.0771	0.39958	0.0296034	0.395712
Zm00001eb332160	228.492	131.155	0.800867	0.000674111	0.0311019
Zm00001eb316520	453.984	212.905	1.09243	0.0224614	0.341309
Zm00001eb335970	82.5706	59.6166	0.469914	0.0133319	0.251808
Zm00001eb400920	3.15306	2.12177	0.571483	0.018701	0.305915
Zm00001eb315310	1.79109	0.379776	2.23761	0.00993155	0.209767
Zm00001eb216660	13.2418	9.3506	0.501964	0.040092	0.465861
Zm00001eb068910	98.0763	66.8823	0.55228	0.00446703	0.119442
Zm00001eb129820	212.093	170.729	0.312989	0.0279711	0.385583
Zm00001eb307290	14.1353	9.92842	0.509668	0.0344827	0.431375
Zm00001eb064680	119.771	99.792	0.263282	0.0419551	0.476273
Zm00001eb395840	0.12719	0.0001	10.3128	0.0368721	1
Zm00001eb335420	0.396345	0.0001	11.9525	0.010843	1
Zm00001eb430790	2.366	0.0539353	5.45507	6.25073e-06	0.000747386
Zm00001eb051060	89.9303	61.401	0.550546	0.044367	0.492045
Zm00001eb081030	102.182	71.257	0.520031	0.0204305	0.322252
Zm00001eb137430	9.93004	2.98909	1.73209	0.000319425	0.0169746
Zm00001eb395530	22.8541	13.1419	0.79828	0.00480794	0.124613
Zm00001eb402940	12.83	5.35797	1.25976	0.0067018	0.157617
Zm00001eb058590	0.740871	0.157132	2.23724	0.0237599	0.351642
Zm00001eb257590	26.9939	17.6543	0.612612	0.00267561	0.0845005
Zm00001eb015210	229.296	171.607	0.418102	0.0241366	0.354496
Zm00001eb112690	2.94486	0.436219	2.75507	0.000108765	0.00705545
Zm00001eb037210	47.6199	32.5409	0.549311	0.0220052	0.337653
Zm00001eb141160	4.45983	2.49768	0.836403	0.00963212	0.205131
Zm00001eb233500	13.2954	3.21768	2.04683	0.00361234	0.103485
Zm00001eb204530	8.784	2.94454	1.57684	0.000430284	0.0215156
Zm00001eb279480	76.6532	41.4702	0.886271	0.00148104	0.0552803
Zm00001eb137390	160.368	74.3697	1.1086	0.000124582	0.0078295
Zm00001eb044060	45.0359	32.2287	0.482733	0.00154722	0.0570995
Zm00001eb358210	23.3232	15.3703	0.601618	0.0168052	0.286143
Zm00001eb138880	17.6388	8.03859	1.13374	0.0363968	0.444861
Zm00001eb238540	25.7108	20.6395	0.316964	0.0151144	0.270523
Zm00001eb065450	8.0814	5.8523	0.465603	0.016285	0.279179
Zm00001eb219580	20.3514	11.6946	0.799289	0.0175844	0.294129
Zm00001eb396490	34.1607	25.475	0.423254	0.0379443	0.454848
Zm00001eb309110	121.73	75.5879	0.687457	0.00418352	0.114123
Zm00001eb154600	70.7247	40.5348	0.803055	0.00296251	0.0901792
Zm00001eb327990	21.376	15.6082	0.45369	0.0123381	0.241503
Zm00001eb226040	23.1727	12.392	0.903016	0.0421353	0.477308
Zm00001eb121270	50.807	27.0474	0.909539	0.016664	0.284695
Zm00001eb170590	18.9872	5.42139	1.80829	1.47003e-06	0.000231739
Zm00001eb084860	18.4392	13.5387	0.445686	0.0282796	0.387509
Zm00001eb135850	13.5941	9.44764	0.524958	0.020113	0.319382
Zm00001eb265890	228.303	131.594	0.794854	0.00491193	0.12658
Zm00001eb280720	20.9873	13.2704	0.661303	0.00823276	0.182635
Zm00001eb342370	173.93	128.632	0.435255	0.0219571	0.337466
Zm00001eb379140	30.689	22.6407	0.438798	0.0456053	0.501908
Zm00001eb404050	77.2209	52.9093	0.545468	0.00220282	0.073911
Zm00001eb269390	80.9759	50.5115	0.680881	0.0116866	0.232727
Zm00001eb013810	77.4653	51.0809	0.600767	0.0162709	0.279179
Zm00001eb018840	20.6543	10.4572	0.981948	0.00158706	0.0580853
Zm00001eb217100	0.572111	0.0872577	2.71294	0.0287949	1
Zm00001eb000880	15.0778	9.3906	0.683135	0.0044685	0.119442
Zm00001eb123800	67.5196	42.5574	0.665895	3.65184e-05	0.00302126
Zm00001eb194140	6.75503	5.29824	0.350448	0.0459288	0.503699
Zm00001eb270420	20.6505	9.52468	1.11643	0.0162496	0.279179
Zm00001eb400800	14.6344	9.49806	0.62366	0.0329601	0.419895
Zm00001eb158830	10.7228	8.72457	0.297532	0.0110411	0.224948
Zm00001eb237910	31.8651	20.1255	0.662953	0.039411	0.463568
Zm00001eb002960	141.519	112.772	0.327593	0.0294669	0.395055
Zm00001eb291320	12.6081	6.7672	0.897714	0.00184331	0.064937
Zm00001eb344760	120.348	87.665	0.457134	0.022125	0.338938
Zm00001eb135720	17.2828	11.6189	0.572863	0.00548751	0.136549
Zm00001eb155720	6.36361	2.5947	1.29428	0.030563	0.402627
Zm00001eb225470	6.04172	3.73344	0.694453	0.013679	0.255118
Zm00001eb282750	64.5139	50.3573	0.35741	0.0261789	0.369728
Zm00001eb021840	8.28326	5.13947	0.688579	0.0298312	0.397029
Zm00001eb014160	36.3495	24.9849	0.540875	0.00254243	0.0818977
Zm00001eb257760	216.158	181.412	0.252815	0.0497153	0.525615
Zm00001eb280060	24.6533	15.8596	0.636425	0.00310014	0.0929668
Zm00001eb369520	26.3219	17.8666	0.558998	0.0100394	0.211016
Zm00001eb169630	42.2588	32.875	0.362261	0.0462497	0.50545
Zm00001eb372380	2.34899	0.820239	1.51793	0.0239832	0.354324
Zm00001eb347050	72.4615	51.8801	0.482034	0.00616929	0.148537
Zm00001eb352800	44.7917	31.7188	0.497892	0.0128274	0.246488
Zm00001eb004320	23.4344	18.5897	0.334123	0.0402122	0.465861
Zm00001eb135550	141.019	103.953	0.439955	0.0401702	0.465861
Zm00001eb034840	131.508	93.8886	0.486125	0.014702	0.266277
Zm00001eb102030	61.4877	43.9923	0.483046	0.0391929	0.462739
Zm00001eb382470	1.58365	0.546702	1.53443	0.00155858	0.057338
Zm00001eb189890	3.43682	1.96003	0.810197	0.00404359	0.110839
Zm00001eb432150	16.0943	11.2176	0.520789	0.0312373	0.407923
Zm00001eb293780	3.92642	2.40397	0.707795	0.0465504	0.507153
Zm00001eb023740	2.23167	0.890911	1.32477	0.0119215	0.235905
Zm00001eb009940	7.33396	4.5508	0.688472	0.0316701	0.410153
Zm00001eb123380	35.967	25.741	0.482606	0.0470175	0.510232
Zm00001eb091430	7.59872	3.99917	0.926054	0.00613288	0.147913
Zm00001eb256720	0.806602	0.105479	2.93491	0.00196397	0.0679157
Zm00001eb368570	9.64938	4.90686	0.975635	7.42607e-05	0.00529164
Zm00001eb377770	1.05439	0.286394	1.88034	0.0314139	0.409085
Zm00001eb126840	2.23595	1.30222	0.77992	0.028905	0.391007
Zm00001eb366150	7.40042	5.00948	0.562946	0.0422619	0.47855
Zm00001eb145750	74.7026	28.5401	1.38817	3.28734e-10	2.01657e-07
Zm00001eb374830	1.97863	0.779105	1.34461	0.0451575	0.498864
Zm00001eb385340	2.83987	0.45297	2.64834	3.38351e-05	0.00285002
Zm00001eb345880	43.3521	27.8662	0.637586	0.00161424	0.0588596
Zm00001eb304260	57.3277	35.4788	0.692277	3.63939e-05	0.00302048
Zm00001eb295960	7.2072	4.69419	0.618562	0.0029914	0.0908481
Zm00001eb102170	3.38633	2.23187	0.601473	0.0392225	0.462895
Zm00001eb019860	117.827	89.4952	0.396783	0.00591423	0.143993
Zm00001eb115990	0.17253	0.0001	10.7526	0.000518684	1
Zm00001eb074990	0.976997	0.541962	0.850164	0.0418724	0.475952
Zm00001eb107200	125.67	69.9236	0.84579	0.0494832	0.524143
Zm00001eb282260	16.0391	9.42208	0.76748	0.0167871	0.28605
Zm00001eb226490	23.7417	6.68738	1.82791	0.0350014	0.434483
Zm00001eb155340	75.3905	53.8826	0.484562	0.028794	0.390839
Zm00001eb258100	37.2529	26.286	0.503058	0.0236036	0.350055
Zm00001eb002610	52.7589	41.427	0.348844	0.0101587	0.212181
Zm00001eb200430	244.33	106.659	1.19582	1.17213e-07	2.82693e-05
Zm00001eb348550	20.0092	15.1129	0.404888	0.0260601	0.368729
Zm00001eb180180	1.34496	0.623604	1.10887	0.0199643	0.318112
Zm00001eb103410	2.08095	1.19186	0.804024	0.0269312	0.37621
Zm00001eb359490	2.31182	0.455621	2.34312	0.0230125	0.345432
Zm00001eb057810	947.079	729.357	0.376859	0.0346719	0.432288
Zm00001eb195030	92.2931	60.2132	0.616143	0.0251447	0.362007
Zm00001eb360670	19.1981	12.6296	0.604155	0.0368129	0.446982
Zm00001eb294860	34.1236	25.0727	0.444653	0.0191361	0.310692
Zm00001eb196710	5.55875	2.50143	1.15201	0.00706104	0.162122
Zm00001eb041800	8.27585	4.17881	0.985814	0.0116167	0.231826
Zm00001eb292830	13.3786	9.16193	0.546204	0.0258601	0.366913
Zm00001eb392390	91.1566	54.1503	0.751378	0.00065613	0.0304018
Zm00001eb220670	16.1952	11.9803	0.434902	0.0383248	0.456448
Zm00001eb331410	31.1386	22.8206	0.448368	0.0109411	0.223721
Zm00001eb288550	5.98941	3.87232	0.629217	0.00440393	0.118481
Zm00001eb332990	54.083	25.5641	1.08106	0.00218643	0.0734486
Zm00001eb065900	9.12072	6.17574	0.562537	0.0140954	0.258611
Zm00001eb038200	21.4943	8.87984	1.27535	0.00128329	0.0490799
Zm00001eb307320	1.30919	0.606726	1.10956	0.00395768	0.109274
Zm00001eb372570	61.8832	38.667	0.678446	0.00203796	0.0695292
Zm00001eb353910	29.2768	11.7144	1.32148	0.00100036	0.0410292
Zm00001eb195170	95.294	70.394	0.436933	0.0366308	0.445729
Zm00001eb414260	64.3086	48.7364	0.400012	0.0230036	0.345432
Zm00001eb352740	0.645609	0.0601537	3.42394	9.66253e-05	0.00640041
Zm00001eb010430	53.5628	39.1235	0.453194	0.0127678	0.24583
Zm00001eb366400	9.2801	6.27524	0.564469	0.0110122	0.224564
Zm00001eb249500	943.038	780.643	0.272653	0.048981	0.521565
Zm00001eb337690	0.654617	0.154224	2.08562	0.0203399	0.321542
Zm00001eb287230	134.524	85.8125	0.648603	0.000507316	0.0245128
Zm00001eb397000	13.6993	8.83514	0.632774	0.0211969	0.329915
Zm00001eb302950	35.9681	27.697	0.37699	0.0247898	0.359674
Zm00001eb096510	272.763	210.063	0.376824	0.0249041	0.360196
Zm00001eb344980	0.475411	0.124495	1.93308	0.0208923	0.327442
Zm00001eb147520	1.60994	0.0001	13.9747	0.0275022	0.381355
Zm00001eb264260	3.40509	1.33033	1.35591	0.0270152	0.376824
Zm00001eb373560	20.0316	15.6135	0.359486	0.0482049	0.518189
Zm00001eb323710	15.6667	7.73316	1.01858	0.00120462	0.0473428
Zm00001eb020790	11.0541	6.89295	0.681383	0.0125968	0.243964
Zm00001eb283390	0.732372	0.267846	1.45117	0.0234432	0.349456
Zm00001eb238030	6.89832	2.69747	1.35464	0.00464253	0.122521
Zm00001eb055030	67.1965	48.3357	0.475297	0.0339871	0.427824
Zm00001eb298060	60.4442	45.2344	0.418182	0.0101478	0.212112
Zm00001eb197680	5.92305	3.82481	0.630952	0.034488	0.431375
Zm00001eb107490	221.056	157.183	0.491967	0.0157789	0.276381
Zm00001eb218250	3.8647	1.64915	1.22863	0.0353611	0.437518
Zm00001eb125700	28.5176	21.6367	0.398371	0.0472152	0.51184
Zm00001eb273600	6.19885	4.41244	0.490423	0.0470307	0.510232
Zm00001eb371720	31.3967	20.3696	0.624198	0.0338054	0.42662
Zm00001eb130820	99.1168	73.7935	0.425635	0.00578104	0.141975
Zm00001eb033920	4.74779	2.95801	0.682627	0.0492906	0.523158
Zm00001eb043390	36.3118	25.9545	0.484451	0.0465139	0.507109
Zm00001eb002310	1.23857	0.361061	1.77836	0.00257806	0.0822938
Zm00001eb295020	10.6634	6.69264	0.672024	0.000730338	0.0331329
Zm00001eb112960	10.1355	5.48018	0.887121	0.0224799	0.341309
Zm00001eb008830	95.3771	61.6147	0.630369	0.0190289	0.309664
Zm00001eb216590	19.4928	9.61193	1.02004	0.0134873	0.253385
Zm00001eb395990	0.600884	0.0001	12.5529	0.00548212	1
Zm00001eb316460	161.877	100.136	0.692936	0.000814969	0.0357648
Zm00001eb246230	13.349	10.1047	0.401699	0.0353822	0.437518
Zm00001eb178180	351.144	255.378	0.459427	0.0116041	0.231737
Zm00001eb243040	223.424	152.558	0.550429	0.00208701	0.0707829
Zm00001eb366390	11.2245	7.1858	0.64343	0.0328636	0.419658
Zm00001eb374900	13.1475	5.3514	1.2968	0.00034834	0.018169
Zm00001eb089360	6.51223	2.75005	1.24369	0.00178136	0.0637092
Zm00001eb262650	8.46897	4.6624	0.861115	0.00893697	0.194887
Zm00001eb269840	113.458	74.3221	0.610292	0.0385674	0.458126
Zm00001eb405650	12.2817	8.87238	0.469115	0.0364989	0.445173
Zm00001eb289160	23.2467	16.5518	0.490039	0.0058342	0.142694
Zm00001eb353470	3.44207	1.86598	0.883342	0.0350136	0.434483
Zm00001eb226370	2.04379	1.21067	0.755445	0.0492118	0.522838
Zm00001eb141110	3.85964	0.0001	15.2362	0.000701882	0.0322569
Zm00001eb306350	102.068	54.3539	0.909072	0.0140346	0.258444
Zm00001eb423890	17.7419	13.2838	0.417491	0.0353378	0.437518
Zm00001eb046690	6.22015	3.42178	0.862201	0.00010682	0.0069453
Zm00001eb072310	15.439	9.30997	0.72973	0.0016054	0.0586804
Zm00001eb161860	7.86176	5.41208	0.538669	0.0457729	0.503163
Zm00001eb291860	38.5261	29.3458	0.392686	0.035312	0.437416
Zm00001eb301460	7.80849	4.77264	0.710258	0.000799484	0.0354233
Zm00001eb275120	20.8815	13.153	0.666838	0.0203936	0.32185
Zm00001eb161290	69.7558	44.5204	0.647846	0.0276083	0.38245
Zm00001eb239540	5.85866	3.10064	0.918004	0.00487961	0.126092
Zm00001eb023460	70.2453	46.0609	0.608859	0.00161865	0.0588596
Zm00001eb192180	9.41108	4.88476	0.946073	0.0401018	0.465861
Zm00001eb360290	46.4103	30.5412	0.603692	0.0135288	0.25349
Zm00001eb194800	15.8543	9.55517	0.730518	0.00663122	0.156586
Zm00001eb202560	0.199209	0.0001	10.9601	0.0412514	1
Zm00001eb052150	44.0714	22.2931	0.983244	2.54918e-05	0.00225495
Zm00001eb334570	6.90487	3.01575	1.1951	0.0235079	0.349681
Zm00001eb338220	0.340297	0.0353307	3.2678	0.00967605	1
Zm00001eb049260	0.419507	0.0001	12.0345	0.0125019	1
Zm00001eb017330	5.9609	4.13444	0.527837	0.0348915	0.433926
Zm00001eb144930	221.956	110.52	1.00597	0.0181396	0.300566
Zm00001eb002390	344.077	175.32	0.97274	0.00106201	0.0430572
Zm00001eb416400	30.7423	18.479	0.73434	0.00213281	0.0720816
Zm00001eb378140	0.68569	0.281564	1.28409	0.046402	0.506331
Zm00001eb217640	10.8686	7.14763	0.604635	0.0258988	0.367242
Zm00001eb205370	3.90321	2.1875	0.83538	0.0131724	0.250563
Zm00001eb267030	1524.06	534.823	1.51078	1.98724e-06	0.000296699
Zm00001eb395910	11.829	8.37521	0.498135	0.00981244	0.2085
Zm00001eb157410	50.2435	37.4642	0.423426	0.00549758	0.136559
Zm00001eb254200	36.1493	24.7387	0.547196	0.0442148	0.491009
Zm00001eb312010	73.061	44.106	0.728127	7.67622e-07	0.000145374
Zm00001eb200040	1.79425	0.688098	1.3827	0.00327781	0.0965483
Zm00001eb279470	94.5185	56.0429	0.754065	0.00276336	0.0858773
Zm00001eb395240	24.6488	19.226	0.358461	0.0309811	0.406051
Zm00001eb252390	6.83705	4.49292	0.605719	0.0206617	0.324989
Zm00001eb286920	78.7959	57.6555	0.450662	0.0119215	0.235905
Zm00001eb129600	18.2129	9.48835	0.940733	0.0252279	0.362348
Zm00001eb006680	7.49162	4.75283	0.65649	0.028114	0.385994
Zm00001eb043960	3.09786	1.64498	0.913202	0.00192588	0.067175
Zm00001eb099980	143.58	116.43	0.302383	0.0372613	0.449551
Zm00001eb066070	0.580125	0.0279703	4.37439	0.00773887	0.174143
Zm00001eb374130	1.31276	0.18179	2.85226	0.021358	0.33169
Zm00001eb103250	14.9657	9.44666	0.663784	0.00347389	0.100437
Zm00001eb188550	116.567	75.9145	0.618706	0.0012832	0.0490799
Zm00001eb002400	204.977	94.9038	1.11092	0.000500465	0.0242648
Zm00001eb008440	69.239	56.6095	0.290541	0.0288609	0.39088
Zm00001eb107230	92.2213	63.0476	0.548658	0.0445822	0.493729
Zm00001eb184010	6.75176	4.08645	0.724415	0.00436291	0.117924
Zm00001eb029260	0.159063	0.0240663	2.72451	0.0233555	1
Zm00001eb011920	28.5675	18.9234	0.594206	0.00350405	0.101101
Zm00001eb364400	1.91461	0.829381	1.20694	0.00112885	0.0451189
Zm00001eb275040	4.10759	2.63037	0.643026	0.0215352	0.334184
Zm00001eb248360	1.7089	0.83848	1.02722	0.0335361	0.424793
Zm00001eb383870	7.48559	4.50097	0.733881	0.0157143	0.275934
Zm00001eb061780	2.49842	1.08526	1.20297	0.00720132	0.164566
Zm00001eb182590	21.4569	13.9057	0.625764	0.0437044	0.487451
Zm00001eb169330	14.1046	8.70954	0.6955	0.0201564	0.31961
Zm00001eb343260	40.4431	27.007	0.582563	0.0267418	0.375049
Zm00001eb248500	16.9058	11.6247	0.540324	0.00887957	0.19404
Zm00001eb352050	2.96655	0.956961	1.63225	0.0415498	0.47391
Zm00001eb324490	5.4519	3.39279	0.684285	0.0216808	0.335517
Zm00001eb129910	467.387	314.036	0.573687	0.00714496	0.163783
Zm00001eb044090	25.4503	15.666	0.700046	0.000448302	0.0221157
Zm00001eb394540	63.7266	49.487	0.364845	0.0452007	0.498864
Zm00001eb124790	2.91926	1.41612	1.04366	0.0162752	0.279179
Zm00001eb426080	1.92891	0.63746	1.59738	0.0151327	0.270606
Zm00001eb146500	72.3653	53.5431	0.434597	0.0364446	0.444861
Zm00001eb113240	108.083	80.6902	0.421672	0.00452669	0.12039
Zm00001eb322350	5.98753	4.158	0.526071	0.045261	0.499091
Zm00001eb118810	31.3119	21.7093	0.528399	0.0406982	0.468259
Zm00001eb189300	362.823	234.144	0.631868	0.0475016	0.514224
Zm00001eb013440	127.608	91.29	0.48319	0.0374113	0.450372
Zm00001eb315430	4.6639	2.54052	0.876411	0.00127161	0.048886
Zm00001eb353110	36.1747	22.8957	0.659908	0.0319175	0.411819
Zm00001eb193920	8.74106	5.31331	0.718197	0.0342746	0.429658
Zm00001eb035540	0.176239	0.0334223	2.39865	0.045017	1
Zm00001eb205770	73.2231	57.1329	0.357977	0.0367427	0.446322
Zm00001eb287200	1.18746	0.445191	1.41539	0.0180112	0.299198
Zm00001eb288150	56.9898	40.141	0.505627	0.0023574	0.0774403
Zm00001eb121780	0.717378	0.287966	1.31684	0.0339246	0.42755
Zm00001eb433460	20.7384	14.715	0.495012	0.0434064	0.485855
Zm00001eb048650	0.38695	0.0001	11.9179	0.00027875	1
Zm00001eb329050	6.48981	2.84163	1.19146	0.00479809	0.124613
Zm00001eb397270	41.0436	29.2458	0.488928	0.0205801	0.323887
Zm00001eb314840	37.5259	26.4027	0.507199	0.0339416	0.427573
Zm00001eb106100	13.1714	9.8613	0.417561	0.0401866	0.465861
Zm00001eb229490	51.5429	36.6207	0.493116	0.00326318	0.0963184
Zm00001eb153700	11.9387	8.13622	0.553219	0.0297549	0.396798
Zm00001eb155620	0.643537	0.0654147	3.29834	0.00527472	0.133132
Zm00001eb226440	6.82175	4.90329	0.47639	0.0402498	0.465861
Zm00001eb336870	65.5905	53.8836	0.283641	0.026249	0.370063
Zm00001eb328470	11.9072	9.03593	0.398087	0.0488124	0.520752
Zm00001eb238060	22.3225	17.1682	0.378756	0.0383444	0.456448
Zm00001eb185390	37.229	28.8815	0.366281	0.0229047	0.34489
Zm00001eb400300	58.4395	20.4175	1.51714	0.00052894	0.0253406
Zm00001eb236370	22.1727	15.3437	0.531135	0.0158817	0.276806
Zm00001eb295050	373.638	274.322	0.44577	0.0365585	0.445346
Zm00001eb303010	205.228	156.069	0.395038	0.0326734	0.419057
Zm00001eb254080	101.388	70.5028	0.524139	0.0150531	0.269865
Zm00001eb058860	18.5362	14.7058	0.333964	0.0490646	0.521863
Zm00001eb315100	16.9103	10.3743	0.704882	0.00136872	0.051773
Zm00001eb011840	149.408	89.6027	0.73764	4.2649e-06	0.000537263
Zm00001eb431520	17.6377	9.62147	0.874333	5.9102e-05	0.00448317
Zm00001eb372940	6.10986	4.45503	0.455704	0.0181611	0.300718
Zm00001eb404800	53.492	20.8146	1.36173	3.17096e-06	0.00043436
Zm00001eb264680	55.645	37.9859	0.550787	0.0110141	0.224564
Zm00001eb305190	6.79704	3.85882	0.816748	0.00464587	0.122521
Zm00001eb117270	11.0876	8.51426	0.380998	0.0386858	0.458863
Zm00001eb088830	5.18268	3.46481	0.580922	0.027926	0.385338
Zm00001eb192470	91.035	48.3711	0.912276	0.000190885	0.0111751
Zm00001eb352710	76.5546	39.796	0.943865	6.91913e-07	0.000132819
Zm00001eb218400	45.5914	23.2418	0.972038	3.24385e-05	0.0027488
Zm00001eb054230	238.898	158.568	0.591294	0.0101194	0.21199
Zm00001eb133810	619.097	415.411	0.575625	0.0395745	0.46461
Zm00001eb157310	549.823	376.079	0.54793	0.00614905	0.148176
Zm00001eb046440	328.855	229.333	0.520008	0.0372489	0.449551
Zm00001eb095350	269.433	180.931	0.574486	0.00196109	0.0679157
Zm00001eb285460	12.4926	2.463	2.34259	7.74419e-07	0.000145585
Zm00001eb170530	3.02034	1.95318	0.628883	0.0143632	0.262161
Zm00001eb384840	5.38457	3.12429	0.785302	0.0130204	0.248922
Zm00001eb301450	17.9761	11.264	0.674356	0.00197514	0.0681171
Zm00001eb213180	22.1797	13.4314	0.723624	0.0121913	0.23991
Zm00001eb236810	1.29342	0.355397	1.86369	0.00733533	0.166792
Zm00001eb076900	2.15483	0.950632	1.18062	0.00190937	0.0669233
Zm00001eb195710	378.851	185.44	1.03067	4.43665e-06	0.000553954
Zm00001eb165620	15.8832	4.28289	1.89084	3.99029e-06	0.000516505
Zm00001eb441830	40.345	21.9784	0.876302	0.00229962	0.0761611
Zm00001eb362640	6.16111	3.27571	0.911385	0.00343624	0.099757
Zm00001eb256080	9.35605	4.69273	0.995471	0.0378676	0.454315
Zm00001eb093750	39.64	28.7952	0.46113	0.00301628	0.0912795
Zm00001eb199180	9.61517	6.0771	0.661929	0.0358847	0.441795
Zm00001eb370260	5.03425	3.30647	0.606484	0.00880608	0.192777
Zm00001eb333900	11.9141	7.26706	0.713228	0.00431195	0.11677
Zm00001eb103970	16.8531	0.0001	17.3627	0.00304207	0.0918087
Zm00001eb218420	12.6537	6.71778	0.913505	0.0495704	0.524673
Zm00001eb203820	39.3042	25.6471	0.615888	0.00274428	0.0855668
Zm00001eb150420	118.096	65.9884	0.839675	0.00262716	0.0835774
Zm00001eb279830	10.65	8.19814	0.377479	0.0463022	0.505632
Zm00001eb350790	22.9902	16.9792	0.437248	0.0119137	0.235905
Zm00001eb193100	67.5635	48.3952	0.481379	0.00123643	0.0481236
Zm00001eb372490	9.31017	5.94616	0.646851	0.0167514	0.285856
Zm00001eb247530	2.56058	0.884121	1.53415	0.0156063	0.275582
Zm00001eb107630	0.378785	0.0001	11.8872	0.0405588	1
Zm00001eb096930	5.25312	2.36488	1.15141	0.0192542	0.311737
Zm00001eb091920	349.493	207.494	0.752198	0.0332204	0.422531
Zm00001eb250610	269.991	212.135	0.347928	0.0363959	0.444861
Zm00001eb373450	14.1353	10.7959	0.388818	0.0440522	0.490167
Zm00001eb022710	138.49	65.6681	1.07652	0.00182859	0.0647195
Zm00001eb061570	60.2914	46.8431	0.364115	0.0242366	0.354725
Zm00001eb398890	6.68383	4.27708	0.644048	0.0025349	0.0817484
Zm00001eb111420	97.4484	52.7086	0.886599	0.0170545	0.288689
Zm00001eb152920	21.7494	10.5725	1.04066	3.14133e-06	0.00043436
Zm00001eb329290	10.7372	7.18286	0.579993	0.00694742	0.161219
Zm00001eb297480	2.84976	0.498929	2.51393	0.00635707	0.151763
Zm00001eb025880	44.3349	23.7698	0.899312	9.93879e-08	2.43872e-05
Zm00001eb294110	94.8324	72.6999	0.383426	0.0369375	0.4478
Zm00001eb244390	5.6193	3.38176	0.732617	0.00701071	0.161848
Zm00001eb320950	36.5761	25.4005	0.526044	0.0156805	0.275714
Zm00001eb286120	27.611	19.8427	0.476633	0.043297	0.485594
Zm00001eb287450	69.0551	49.0781	0.492667	0.0361849	0.444327
Zm00001eb366650	0.18643	0.0001	10.8644	0.0415884	1
Zm00001eb406780	2.96116	2.01226	0.55735	0.00538891	0.134809
Zm00001eb002730	0.351065	0.0001	11.7775	5.64743e-05	1
Zm00001eb376570	441.172	328.551	0.425222	0.0242358	0.354725
Zm00001eb057230	381.71	216.736	0.81654	6.8592e-06	0.000799805
Zm00001eb122190	13.4545	9.70618	0.471116	0.0203699	0.321655
Zm00001eb249250	10.108	7.26496	0.476471	0.0255374	0.364373
Zm00001eb404780	62.4228	16.2657	1.94024	5.84147e-06	0.000704422
Zm00001eb168770	0.12546	0.0001	10.293	0.0424841	1
Zm00001eb186440	12.4219	8.67098	0.518623	0.0124962	0.24285
Zm00001eb149460	121.604	91.3004	0.413498	0.0370077	0.448383
Zm00001eb315030	1.4955	0.920922	0.699481	0.0258626	0.366913
Zm00001eb339850	115.511	77.0047	0.585011	0.00291382	0.089372
Zm00001eb311620	18.6861	3.8604	2.27514	0.032463	0.417141
Zm00001eb330530	533.776	375.444	0.507636	0.000870203	0.0376616
Zm00001eb198560	93.0614	59.4562	0.646355	9.75826e-05	0.00643361
Zm00001eb231280	13.3187	8.34321	0.674783	0.0401972	0.465861
Zm00001eb288670	128.571	68.1665	0.91543	4.91466e-06	0.000605597
Zm00001eb144960	602.402	318.539	0.919257	0.0281123	0.385994
Zm00001eb386520	23.0455	17.5055	0.396676	0.0210238	0.328488
Zm00001eb382060	4.46771	3.01409	0.567813	0.0235498	0.350055
Zm00001eb181690	5.02212	2.49873	1.0071	0.0112476	0.227208
Zm00001eb057870	42.2799	28.8223	0.55279	0.0269094	0.376092
Zm00001eb396500	51.3666	36.006	0.512591	0.01264	0.244466
Zm00001eb313310	32.3154	21.4522	0.591098	0.0159476	0.277113
Zm00001eb142580	8.951	6.96462	0.362003	0.0429922	0.483457
Zm00001eb279420	8.24712	4.50601	0.872041	0.00169394	0.0610198
Zm00001eb126670	23.2637	16.0788	0.532923	0.0327241	0.41916
Zm00001eb135570	151.497	99.7172	0.603378	0.0154817	0.274239
Zm00001eb286720	5.8132	2.39626	1.27855	0.024144	0.354496
Zm00001eb042100	4.07723	2.43671	0.742655	0.0200261	0.318543
Zm00001eb071550	10.4498	7.36149	0.505399	0.0191701	0.310887
Zm00001eb195230	15.7178	10.6576	0.560519	0.0104227	0.216097
Zm00001eb238800	168.299	100.495	0.743902	0.0136201	0.254693
Zm00001eb015130	16.98	10.4051	0.706545	0.0180146	0.299198
Zm00001eb283450	329.405	133.624	1.30168	9.20959e-07	0.000161696
Zm00001eb350690	212.772	124.044	0.77846	0.0105291	0.217503
Zm00001eb325230	566.689	382.949	0.565405	0.00560505	0.138862
Zm00001eb373660	0.18777	0.01209	3.95708	0.0461607	1
Zm00001eb355120	119.684	91.6574	0.384906	0.00719973	0.164566
Zm00001eb103200	9.05667	4.6227	0.970246	0.000140357	0.0086476
Zm00001eb116990	164.678	122.824	0.42305	0.048277	0.518371
Zm00001eb073990	6.11172	4.65023	0.394277	0.0268668	0.376092
Zm00001eb314290	11.0985	4.48108	1.30845	0.00380745	0.10648
Zm00001eb407040	7.99901	5.17402	0.628537	0.00702188	0.161882
Zm00001eb336480	24.0801	16.2116	0.57081	0.0226762	0.34273
Zm00001eb367950	6.33053	0.0001	15.95	0.00723147	0.165095
Zm00001eb311510	0.809972	0.0001	12.9837	0.0440935	1
Zm00001eb128330	954.104	610.203	0.644858	0.00309512	0.0929668
Zm00001eb201440	16.2178	12.1384	0.418001	0.0328922	0.419658
Zm00001eb279900	45.4031	33.2124	0.451069	0.0191475	0.310699
Zm00001eb144940	15.2488	6.3602	1.26155	0.0136532	0.254806
Zm00001eb281840	275.283	185.918	0.566248	0.0457229	0.502841
Zm00001eb161710	51.8414	45.3968	0.191515	0.0242541	0.354796
Zm00001eb370400	0.29131	0.0001	11.5083	0.0417552	1
Zm00001eb137280	42.6686	20.5401	1.05473	0.00037391	0.0193596
Zm00001eb390890	1.42379	0.0929973	3.9364	0.00270093	0.0848719
Zm00001eb018160	0.410812	0.0001	12.0043	0.0363397	1
Zm00001eb408560	42.4809	20.3477	1.06195	0.0215423	0.334184
Zm00001eb415520	9.92167	4.40633	1.17101	0.0383962	0.456579
Zm00001eb386040	3.20656	0.48401	2.72792	0.010043	0.211016
Zm00001eb192500	3.8003	2.31681	0.713976	0.00034432	0.018026
Zm00001eb292850	71.4593	44.2431	0.691671	0.0145766	0.264857
Zm00001eb397670	18.3867	11.95	0.621653	0.00508594	0.129761
Zm00001eb218960	9.50722	1.56168	2.60592	2.745e-06	0.000385365
Zm00001eb106580	36.488	24.7225	0.561598	0.00110888	0.0445902
Zm00001eb313530	20.1343	11.7415	0.77804	0.000929829	0.0395149
Zm00001eb028680	24.5686	16.6063	0.565082	0.0318747	0.411454
Zm00001eb253330	3.04814	1.46059	1.06138	0.000223395	0.0126581
Zm00001eb178120	74.7079	52.6975	0.503528	0.00639354	0.152505
Zm00001eb214940	2.62693	1.55942	0.752373	0.0146921	0.26627
Zm00001eb026680	68.7283	50.7609	0.437187	0.0154247	0.273916
Zm00001eb228780	63.4702	42.847	0.566886	0.0236074	0.350055
Zm00001eb413730	14.535	10.5989	0.455619	0.0324014	0.416919
Zm00001eb269820	6.98782	5.08861	0.457571	0.0267118	0.374816
Zm00001eb316130	19.1395	12.4862	0.616211	0.0390942	0.461766
Zm00001eb256570	26.3435	20.2827	0.377199	0.0454305	0.500569
Zm00001eb045960	9.68501	6.8545	0.498702	0.0238556	0.352623
Zm00001eb000990	45.8199	32.6504	0.488874	0.0256724	0.365133
Zm00001eb360960	59.9419	44.1011	0.442752	0.0211251	0.32916
Zm00001eb158960	1.85477	0.67026	1.46845	0.000171	0.0102512
Zm00001eb243270	37.3899	22.6139	0.725439	0.0253216	0.363071
Zm00001eb380240	2.51642	1.50991	0.736911	0.0109571	0.223887
Zm00001eb296090	4.06784	2.05124	0.987769	0.0460267	0.50399
Zm00001eb215310	355.248	256.412	0.470363	0.0272753	0.379701
Zm00001eb403900	9.48669	6.3397	0.581489	0.0268842	0.376092
Zm00001eb328740	78.6833	58.9429	0.416739	0.0429964	0.483457
Zm00001eb151950	28.7375	14.0049	1.037	0.0171288	0.289601
Zm00001eb315650	194.222	153.514	0.339336	0.0400249	0.465861
Zm00001eb406990	14.8368	10.8285	0.454356	0.027352	0.380581
Zm00001eb368780	5.16071	2.74775	0.909317	0.0104494	0.216332
Zm00001eb369780	51.144	41.1506	0.313653	0.0394769	0.464149
Zm00001eb397010	20.754	14.1552	0.552059	0.0306778	0.403574
Zm00001eb347490	90.8771	69.9339	0.377926	0.00598211	0.145145
Zm00001eb173980	25.9463	15.9204	0.704657	0.000800693	0.0354233
Zm00001eb218970	32.8484	7.62398	2.10721	1.49552e-05	0.00149648
Zm00001eb390750	8.54977	6.55135	0.384094	0.0483321	0.518568
Zm00001eb055210	11.0287	7.00965	0.653845	0.0042048	0.114528
Zm00001eb169600	0.581527	0.14192	2.03476	0.0341821	0.42888
Zm00001eb265960	3.61809	2.36081	0.615947	0.0487634	0.520426
Zm00001eb408600	2.932	1.75941	0.73679	0.0339935	0.427824
Zm00001eb182130	74.2429	55.408	0.422158	0.016098	0.278512
Zm00001eb202200	17.0679	7.70737	1.14697	0.00157097	0.0575708
Zm00001eb400410	13.3976	8.06493	0.732242	0.000335966	0.0176871
Zm00001eb313920	5.97432	3.02471	0.981979	0.00457778	0.121406
Zm00001eb438790	14.4551	9.30626	0.635303	0.00373854	0.105171
Zm00001eb003660	51.8086	27.6703	0.90485	0.0262551	0.370063
Zm00001eb032670	9.0681	5.27038	0.782893	0.000625005	0.0291511
Zm00001eb204360	76.8194	58.0687	0.40371	0.0153387	0.273148
Zm00001eb052200	14.8382	8.79383	0.754748	0.00053181	0.025435
Zm00001eb304480	5.54795	2.83222	0.97002	0.00239138	0.078283
Zm00001eb117130	13.6747	7.5487	0.857207	9.13164e-07	0.000161696
Zm00001eb103260	118.545	72.9388	0.700672	0.00271802	0.085063
Zm00001eb153360	8.44042	5.62258	0.586081	0.0402146	0.465861
Zm00001eb065440	0.541029	0.0001	12.4015	0.0115312	1
Zm00001eb213970	28.9356	19.3561	0.580059	0.0132966	0.251476
Zm00001eb109780	28.7919	23.8498	0.271688	0.0427319	0.482181
Zm00001eb380150	52.8171	29.4182	0.844296	0.0314228	0.409085
Zm00001eb314900	0.391511	0.11834	1.72611	0.034459	0.431375
Zm00001eb167670	42.8432	20.2427	1.08167	0.000189133	0.0110956
Zm00001eb200550	0.275441	0.0162883	4.07983	0.00328598	1
Zm00001eb406130	11.846	3.74904	1.6598	0.00124344	0.0481969
Zm00001eb127520	0.188735	0.0001	10.8821	0.0122954	1
Zm00001eb165490	30.7859	20.862	0.561393	0.017812	0.296881
Zm00001eb097880	246.276	139.439	0.820642	0.0317396	0.410494
Zm00001eb292590	61.8207	45.1003	0.454955	0.00930253	0.200381
Zm00001eb285430	81.937	53.3141	0.619998	0.0160884	0.278512
Zm00001eb121200	13.8007	9.3965	0.554543	0.0188016	0.307206
Zm00001eb332210	66.7279	50.4301	0.404005	0.0069685	0.161575
Zm00001eb170580	0.890903	0.15597	2.514	0.0225713	0.34151
Zm00001eb171230	6.12888	1.2794	2.26016	0.000268099	0.0145485
Zm00001eb068980	32.436	21.2263	0.611745	0.000788397	0.0350346
Zm00001eb084290	178.091	145.685	0.28976	0.0393077	0.463126
Zm00001eb374880	168.031	92.7613	0.857128	0.0112366	0.227208
Zm00001eb426510	84.6431	60.84	0.476373	0.0329351	0.419766
Zm00001eb352930	12.074	8.96268	0.4299	0.0126372	0.244466
Zm00001eb152750	47.6693	32.4875	0.553175	0.00340762	0.0991302
Zm00001eb429330	77.9095	46.9327	0.731205	0.00676109	0.15859
Zm00001eb319710	250.252	177.936	0.492022	0.00476036	0.124148
Zm00001eb343410	24.0875	17.2702	0.479999	0.0478354	0.516861
Zm00001eb415630	208.763	138.497	0.59201	0.00685602	0.159918
Zm00001eb071650	30.2246	17.061	0.82502	0.00383357	0.106893
Zm00001eb049860	6.81003	4.36587	0.641391	0.0408592	0.469257
Zm00001eb316920	438.055	112.462	1.96168	6.72376e-06	0.000787654
Zm00001eb309310	15.791	11.2803	0.485299	0.00531589	0.133593
Zm00001eb407890	5.26264	3.76786	0.482043	0.0154112	0.273869
Zm00001eb425540	0.693949	0.259285	1.42029	0.0259334	0.367364
Zm00001eb400810	55.7261	43.5372	0.356104	0.0153427	0.273148
Zm00001eb104120	2.62527	0.935476	1.48869	0.00660827	0.156412
Zm00001eb385350	2.3756	0.39343	2.59412	0.000328448	0.0173236
Zm00001eb258940	41.9496	29.2026	0.522558	0.007105	0.162999
Zm00001eb391000	0.349921	0.054619	2.67955	0.00364902	0.104113
Zm00001eb095660	19.2086	14.2361	0.432197	0.0172436	0.290832
Zm00001eb169350	5.5046	3.96415	0.473627	0.0106613	0.219477
Zm00001eb306850	13.3075	10.4554	0.347999	0.03834	0.456448
Zm00001eb290750	29.5256	20.4428	0.530373	0.0158067	0.276695
Zm00001eb016200	9.63695	6.50521	0.566981	0.0459977	0.50399
Zm00001eb155730	15.2309	9.02831	0.754475	0.0480648	0.517674
Zm00001eb163050	0.772293	0.286633	1.42994	0.0208315	0.326932
Zm00001eb062400	15.6319	11.2711	0.471865	0.0306353	0.403391
Zm00001eb108890	10.6692	7.58836	0.491587	0.0115317	0.230618
Zm00001eb000660	68.6961	27.0239	1.34599	0.0008873	0.0381829
Zm00001eb163830	50.6604	28.5259	0.828587	0.000207037	0.0119717
Zm00001eb255590	21.3845	16.2103	0.399651	0.0244806	0.35667
Zm00001eb035750	49.8817	39.3987	0.340363	0.0237198	0.351352
Zm00001eb364860	2.40777	0.840173	1.51894	0.00364822	0.104113
Zm00001eb268550	16.0632	11.612	0.468144	0.0119827	0.236784
Zm00001eb275550	30.0544	20.4244	0.557284	0.0114853	0.230235
Zm00001eb001950	1.30447	0.313309	2.05781	0.022215	0.339395
Zm00001eb128730	360.949	272.961	0.4031	0.0223007	0.340152
Zm00001eb252200	26.8166	19.8325	0.435259	0.0303589	0.400873
Zm00001eb398840	50.7584	37.4559	0.438451	0.0148825	0.267658
Zm00001eb421170	133.962	108.501	0.304115	0.0376658	0.452935
Zm00001eb390560	1.59035	0.769598	1.04717	0.038118	0.455575
Zm00001eb329170	0.328383	0.0001	11.6812	0.0492145	1
Zm00001eb061880	11.0516	6.69845	0.722363	0.0116805	0.232727
Zm00001eb174500	10.3288	7.89186	0.38823	0.0427364	0.482181
Zm00001eb059040	9.28783	4.79165	0.95482	0.00507041	0.129748
Zm00001eb107930	32.1517	23.9918	0.422354	0.00329759	0.0970296
Zm00001eb211490	5.59343	3.01414	0.891986	0.0340264	0.427878
Zm00001eb319800	17.4295	10.9681	0.668212	0.00471052	0.123418
Zm00001eb220480	59.4912	41.6037	0.515966	0.0138479	0.256572
Zm00001eb221680	57.0576	43.3534	0.396274	0.0227818	0.343773
Zm00001eb091400	232.111	184.238	0.333243	0.032315	0.416186
Zm00001eb074270	64.2558	43.2119	0.5724	0.00396215	0.10929
Zm00001eb058760	48.4003	39.0879	0.308294	0.0176643	0.294941
Zm00001eb367740	20.2487	13.1162	0.626477	0.0341178	0.428645
Zm00001eb398550	63.6841	43.1041	0.563107	0.0280459	0.385874
Zm00001eb334550	11.4178	7.20421	0.664376	0.0417774	0.475161
Zm00001eb249590	136.919	52.3255	1.38773	8.155e-12	8.85069e-09
Zm00001eb191680	49.8819	31.9722	0.6417	0.00529033	0.133407
Zm00001eb044620	18.1334	13.285	0.448844	0.0141851	0.259919
Zm00001eb022570	81.8365	58.4756	0.48491	0.0180101	0.299198
Zm00001eb412900	1.10033	0.410478	1.42256	0.0362892	0.444861
Zm00001eb119280	25.573	12.8894	0.988443	0.00161689	0.0588596
Zm00001eb258250	0.358879	0.0148227	4.59762	0.0232715	0.347816
Zm00001eb060520	229.959	121.72	0.91781	0.00112056	0.0449147
Zm00001eb008960	0.365995	0.0001	11.8376	0.0406738	1
Zm00001eb427910	23.8944	17.8529	0.420517	0.0182104	0.301207
Zm00001eb153760	198.219	83.095	1.25426	0.00205317	0.0698869
Zm00001eb283580	0.871379	0.00817467	6.736	0.00229094	0.0761611
Zm00001eb155680	50.0528	35.1808	0.508661	0.0124142	0.242257
Zm00001eb199660	63.5704	47.8325	0.410364	0.0416673	0.474674
Zm00001eb313850	282.97	220.221	0.361699	0.0362369	0.444756
Zm00001eb404880	114.755	88.4425	0.37575	0.0344294	0.431216
Zm00001eb067190	12.0857	7.91108	0.61135	0.0154641	0.274239
Zm00001eb175860	156.761	114.198	0.45703	0.0128748	0.246891
Zm00001eb321960	4.2825	0.358275	3.57932	0.000109961	0.00710039
Zm00001eb156270	0.383161	0.00986633	5.27929	0.0198519	1
Zm00001eb326930	16.0616	10.2497	0.648039	0.0242028	0.354597
Zm00001eb137410	10.1736	2.38911	2.09029	0.000959948	0.0403787
Zm00001eb280920	5.11907	3.68975	0.472359	0.0302277	0.400454
Zm00001eb101490	0.432456	0.0001	12.0783	0.036405	1
Zm00001eb245250	8.81356	4.82512	0.869159	0.0106067	0.218626
Zm00001eb332980	0.429555	0.133097	1.69036	0.0436673	0.487229
Zm00001eb418230	45.8922	12.9941	1.82039	4.31312e-11	3.80337e-08
Zm00001eb214720	77.8539	61.2727	0.345525	0.0372968	0.449761
Zm00001eb144630	49.1065	34.4753	0.510348	0.0080259	0.179173
Zm00001eb032680	8.27018	4.49524	0.879522	0.00360239	0.103305
Zm00001eb368680	47.4053	30.7493	0.624493	0.000951109	0.0401172
Zm00001eb026350	3.93513	2.35434	0.741089	0.0390662	0.461629
Zm00001eb119320	70.0162	53.5508	0.386782	0.0112007	0.226892
Zm00001eb105610	35.0639	22.8346	0.618761	0.00293137	0.0895209
Zm00001eb204990	13.6307	6.99687	0.96208	0.00366137	0.10419
Zm00001eb053700	62.8833	8.47878	2.89075	0.0430107	0.483457
Zm00001eb062390	461.14	331.028	0.478251	0.00310039	0.0929668
Zm00001eb106360	36.0983	26.9391	0.42223	0.0199297	0.318112
Zm00001eb333300	81.7634	51.4144	0.669282	8.30353e-05	0.00574992
Zm00001eb326020	27.7797	20.4825	0.439637	0.0394955	0.464175
Zm00001eb284750	10.263	5.16622	0.990267	0.00390256	0.108495
Zm00001eb399900	83.6309	53.5543	0.643034	0.00704688	0.162061
Zm00001eb360550	0.632808	0.147637	2.09972	0.0172795	0.290832
Zm00001eb289480	9.06501	6.87962	0.397979	0.0371764	0.449462
Zm00001eb253040	6.92013	3.99642	0.792092	0.00189618	0.0666331
Zm00001eb434590	230.523	165.956	0.474115	0.0218656	0.336471
Zm00001eb384280	39.0829	22.7862	0.778376	0.00805655	0.179573
Zm00001eb414390	371.282	200.501	0.88891	0.000515133	0.0247885
Zm00001eb028770	6.94854	2.51676	1.46514	0.00230227	0.0761611
Zm00001eb430020	9.26274	5.81502	0.671655	0.0031035	0.0929668
Zm00001eb285010	69.645	50.6958	0.458154	0.00337562	0.0985038
Zm00001eb000840	61.9964	34.9429	0.827183	3.98758e-06	0.000516505
Zm00001eb098340	37.8275	18.9798	0.99497	0.0426454	0.481926
Zm00001eb417620	37.4265	22.6449	0.724873	0.00441306	0.118598
Zm00001eb363310	36.2252	25.5486	0.503752	0.0172626	0.290832
Zm00001eb158210	45.0352	21.8672	1.04229	0.00019899	0.0116254
Zm00001eb294020	28.0557	14.0293	0.99985	0.000710271	0.0325018
Zm00001eb069600	96.8383	65.8986	0.555332	0.0186638	0.305838
Zm00001eb073680	83.7721	63.5093	0.399501	0.0113302	0.228206
Zm00001eb295850	203.223	133.528	0.605918	0.000512832	0.0247369
Zm00001eb078010	25.3334	15.2031	0.736676	0.000987368	0.0409113
Zm00001eb075020	13.8497	6.89375	1.0065	0.04175	0.475161
Zm00001eb325650	227.429	144.172	0.657628	4.67676e-05	0.00368628
Zm00001eb173290	6.90036	2.03687	1.76031	0.00245087	0.0796965
Zm00001eb298250	300.773	228.158	0.398642	0.0448875	0.496331
Zm00001eb335560	151.055	72.4454	1.06011	2.28564e-06	0.000334177
Zm00001eb155410	5.96521	2.76588	1.10883	0.017028	0.288412
Zm00001eb148880	32.5614	25.3618	0.360508	0.0316349	0.410153
Zm00001eb372960	15.477	6.71561	1.20453	0.0339186	0.42755
Zm00001eb289630	74.9117	45.4558	0.720726	0.0407706	0.46843
Zm00001eb317430	153.677	115.753	0.408858	0.013467	0.253369
Zm00001eb385700	8.08032	2.98954	1.43449	0.00932605	0.200734
Zm00001eb285190	53.7139	39.3987	0.447149	0.0199651	0.318112
Zm00001eb243690	24.7331	17.1223	0.530564	0.012735	0.245797
Zm00001eb092180	6.38933	4.46928	0.515623	0.0173799	0.292094
Zm00001eb177080	0.748695	0.203707	1.87788	0.0378603	0.454315
Zm00001eb068450	0.131907	0.0001	10.3653	0.041175	1
Zm00001eb382910	7.13795	4.10868	0.796836	0.0208685	0.32733
Zm00001eb266570	84.5213	64.3866	0.392554	0.0259313	0.367364
Zm00001eb020410	20.0902	10.0325	1.00181	0.0044741	0.119442
Zm00001eb020040	40.9527	31.7586	0.366811	0.0480616	0.517674
Zm00001eb186300	304.151	225.799	0.429749	0.0221965	0.339395
Zm00001eb320670	14.4947	11.2913	0.36031	0.0255192	0.364373
Zm00001eb204260	70.6736	53.3242	0.406381	0.00314493	0.0939086
Zm00001eb108940	72.7792	56.3153	0.369999	0.0337124	0.425826
Zm00001eb316620	12.064	6.91338	0.803241	0.0213395	0.331585
Zm00001eb330650	52.9546	42.0175	0.333766	0.0128727	0.246891
Zm00001eb213610	90.186	73.7506	0.290249	0.0478359	0.516861
Zm00001eb026930	9.44332	6.16543	0.615091	0.025109	0.361791
Zm00001eb327470	17.0856	11.0192	0.632753	0.0136377	0.254806
Zm00001eb306610	11.9671	6.95673	0.782595	0.029481	0.395055
Zm00001eb197750	5.23764	2.65451	0.980474	0.00686303	0.159918
Zm00001eb288410	15.8335	7.42612	1.0923	0.000249787	0.0138206
Zm00001eb075730	49.5947	34.1494	0.538325	0.00128983	0.0491179
Zm00001eb366530	74.4677	46.3724	0.683349	0.000866969	0.0375793
Zm00001eb217490	1.22036	0.586504	1.05709	0.0074025	0.167778
Zm00001eb092730	16.0565	10.8176	0.569776	0.0240318	0.354485
Zm00001eb215120	273.228	175.879	0.635518	0.0020623	0.0700875
Zm00001eb156920	28.8831	20.8745	0.468483	0.0132627	0.251079
Zm00001eb037570	331.824	213.285	0.637639	0.0114881	0.230235
Zm00001eb091240	11.8038	9.10867	0.373945	0.0270429	0.376977
Zm00001eb125410	9.03764	5.24772	0.784254	0.0149246	0.26806
Zm00001eb042090	3.06906	1.3455	1.18965	2.46537e-05	0.00220851
Zm00001eb124320	10.8745	8.46764	0.360912	0.0342171	0.429128
Zm00001eb035760	1.53982	0.93159	0.724997	0.014479	0.263592
Zm00001eb333490	48.9875	27.0084	0.859007	0.00012241	0.00772747
Zm00001eb371500	24.3323	17.0041	0.516993	0.0158493	0.276806
Zm00001eb398870	37.8986	23.498	0.689604	0.0122091	0.240051
Zm00001eb386190	69.7823	33.8285	1.04462	0.00108676	0.0438715
Zm00001eb131620	48.1621	30.8502	0.642621	0.00191155	0.0669233
Zm00001eb108730	0.836934	0.0870443	3.26529	0.000937972	0.0397413
Zm00001eb429770	0.437798	0.0246983	4.14778	0.010038	1
Zm00001eb106010	65.4936	30.8741	1.08496	0.0139574	0.25725
Zm00001eb314370	0.840242	0.145648	2.52832	0.00927546	0.19995
Zm00001eb006690	227.009	166.081	0.450869	0.0486173	0.51985
Zm00001eb367790	27.0627	20.5507	0.397115	0.03101	0.406189
Zm00001eb030400	29.3774	23.0385	0.350663	0.0364466	0.444861
Zm00001eb085620	6.55705	1.20736	2.4412	1.07246e-06	0.000183411
Zm00001eb121770	0.687555	0.275995	1.31684	0.0339246	0.42755
Zm00001eb070480	18.8711	10.8306	0.801063	0.0156592	0.275714
Zm00001eb296220	82.401	54.371	0.599823	0.019301	0.3119
Zm00001eb172230	141.311	91.6919	0.62401	0.0200157	0.318543
Zm00001eb328600	30.2417	22.0178	0.45787	0.0156647	0.275714
Zm00001eb194180	4.81975	3.42494	0.492881	0.0424616	0.48004
Zm00001eb394270	15.9595	11.0538	0.529871	0.00867049	0.190548
Zm00001eb166450	307.852	203.531	0.596989	0.00032144	0.0170176
Zm00001eb330510	1.80695	0.366614	2.30122	0.00387009	0.107805
Zm00001eb193090	32.4783	24.4659	0.408703	0.00642764	0.153189
Zm00001eb084690	28.5072	17.4913	0.704686	0.0495961	0.524748
Zm00001eb247170	1.34098	0.661951	1.01849	0.0240618	0.354496
Zm00001eb177240	12.5105	7.74856	0.691143	0.00273869	0.0855668
Zm00001eb143420	2.10226	1.09855	0.936343	0.000363083	0.0189031
Zm00001eb201770	98.1011	66.5882	0.559002	0.00400587	0.110281
Zm00001eb142480	7.20481	3.35165	1.10409	0.00850481	0.187491
Zm00001eb079770	3.62509	2.0874	0.796311	0.0175273	0.293724
Zm00001eb103760	79.2136	59.5615	0.411368	0.0241587	0.354496
Zm00001eb213560	11.3808	4.49483	1.34026	0.00794872	0.177872
Zm00001eb403550	4.35398	3.23447	0.428806	0.0491271	0.522135
Zm00001eb170210	23.4024	16.3637	0.516163	0.0404383	0.466817
Zm00001eb298190	0.559441	0.080995	2.78808	0.00323481	0.0957607
Zm00001eb203850	9.98713	7.79942	0.356702	0.0335403	0.424793
Zm00001eb431370	68.9162	51.4707	0.421092	0.0413689	0.472037
Zm00001eb406250	6.8456	4.29651	0.672011	0.0317038	0.410375
Zm00001eb299450	1616.42	1034.68	0.643618	0.000674548	0.0311019
Zm00001eb369600	13.3553	8.06776	0.727177	0.0349481	0.434145
Zm00001eb370640	83.7041	56.5779	0.565061	0.00428202	0.116071
Zm00001eb132970	0.355415	0.0509953	2.80107	0.0439442	1
Zm00001eb265430	135.605	106.216	0.352402	0.0332269	0.422531
Zm00001eb012580	893.705	707.304	0.337468	0.0172842	0.290832
Zm00001eb293190	79.1519	59.0719	0.422151	0.0234815	0.349587
Zm00001eb352780	11.0832	7.62132	0.540259	0.00197703	0.0681171
Zm00001eb178780	28.0686	18.2967	0.617371	0.00156495	0.0574249
Zm00001eb332460	155.139	113.374	0.452473	0.00681283	0.159341
Zm00001eb174310	54.7879	41.9951	0.383635	0.00999858	0.210855
Zm00001eb026010	10.0833	7.29896	0.466203	0.017278	0.290832
Zm00001eb357930	4.0008	1.24921	1.67928	0.00104962	0.0428007
Zm00001eb296520	5.37348	3.23507	0.73206	0.0413253	0.472037
Zm00001eb008930	13.473	8.58898	0.649518	0.0357948	0.440881
Zm00001eb343900	0.358822	0.0001	11.8091	0.026656	1
Zm00001eb250560	1.3337	0.17348	2.94259	0.0480447	0.517674
Zm00001eb157710	7.08108	4.50643	0.651984	0.00510033	0.129893
Zm00001eb182010	7.31118	5.09541	0.520906	0.0290161	0.391167
Zm00001eb094890	0.933038	0.367885	1.34268	0.0297717	0.396834
Zm00001eb042170	9.25721	4.25608	1.12105	0.032928	0.419766
Zm00001eb052540	403.586	269.854	0.580699	0.000397535	0.0202851
Zm00001eb104470	13.9728	1.88933	2.88667	6.51359e-06	0.000772271
Zm00001eb241500	14.086	10.5287	0.419936	0.0418807	0.475952
Zm00001eb136750	5.24958	3.36009	0.643702	0.026755	0.375049
Zm00001eb116010	679.667	467.193	0.540811	0.0186111	0.30564
Zm00001eb430910	4.289	2.54831	0.751098	0.0305064	0.402069
Zm00001eb416250	5.29642	1.28581	2.04234	0.0174449	0.292837
Zm00001eb262710	5.60587	3.09715	0.855996	0.0186362	0.30564
Zm00001eb150740	51.1611	28.0692	0.866058	0.0132458	0.251079
Zm00001eb152670	9.70624	5.78151	0.747468	0.0121919	0.23991
Zm00001eb217930	8.85992	6.75131	0.392124	0.0249994	0.360613
Zm00001eb321710	28.4239	18.6649	0.606778	0.00153878	0.0569086
Zm00001eb242750	53.7753	33.5097	0.682364	0.0137766	0.256262
Zm00001eb092850	6.75046	4.9053	0.460644	0.0179855	0.299198
Zm00001eb032380	582.841	421.602	0.46722	0.0131761	0.250563
Zm00001eb201530	0.259359	0.0001	11.3407	0.0464812	1
Zm00001eb343680	273.807	190.526	0.523168	0.00369654	0.104728
Zm00001eb341260	19.8498	16.1617	0.29655	0.0488578	0.520873
Zm00001eb192480	21.6917	6.96496	1.63896	2.95169e-08	8.58667e-06
Zm00001eb188280	2.50037	1.57152	0.669978	0.031056	0.406276
Zm00001eb152990	6.85477	4.48699	0.611361	0.0348843	0.433926
Zm00001eb218000	261.873	183.346	0.514299	0.0197129	0.315711
Zm00001eb424250	19.4531	11.861	0.713776	0.0222131	0.339395
Zm00001eb311830	1.01408	0.227584	2.1557	0.0396665	0.46461
Zm00001eb323590	80.559	60.8064	0.405821	0.0286957	0.390234
Zm00001eb216120	8.72218	6.43318	0.439156	0.0193799	0.312493
Zm00001eb017120	4.18201	1.66506	1.32862	0.000401956	0.0204737
Zm00001eb128840	1.94837	0.738724	1.39916	0.0138145	0.256375
Zm00001eb283110	325.597	216.194	0.590763	0.000382408	0.0196196
Zm00001eb315300	0.408144	0.0001	11.9949	0.00465915	1
Zm00001eb389490	0.235279	0.0446863	2.39647	0.0251814	0.362093
Zm00001eb001560	134.631	100.713	0.41877	0.0487594	0.520426
Zm00001eb407710	6755.91	5317.22	0.345477	0.0432879	0.485594
Zm00001eb169420	161.063	91.55	0.814996	0.0103688	0.215297
Zm00001eb137920	36.2559	21.7924	0.734389	0.00620389	0.149115
Zm00001eb347360	2.46222	1.18752	1.05201	0.0307331	0.403925
Zm00001eb391690	1710.49	961.666	0.8308	0.0094001	0.201406
Zm00001eb233090	147.637	108.958	0.438287	0.00734351	0.166843
Zm00001eb023420	45.6974	26.1308	0.806361	0.0290693	0.391167
Zm00001eb381620	433.16	293.342	0.562317	0.0303778	0.400936
Zm00001eb039770	54.7906	29.4826	0.894063	0.00523109	0.132431
Zm00001eb140890	70.2938	55.4629	0.341874	0.0222398	0.339406
Zm00001eb354510	26.4922	16.4563	0.686923	0.00131944	0.0501104
Zm00001eb419040	16.436	10.294	0.675049	0.0433956	0.485855
Zm00001eb290670	7.7749	4.318	0.848462	0.00526605	0.133033
Zm00001eb404730	77.7205	57.443	0.436164	0.0100377	0.211016
Zm00001eb184780	1.33087	0.644168	1.04686	0.0277894	0.384581
Zm00001eb201970	1.32306	0.0001	13.6916	0.0173913	1
Zm00001eb017620	27.463	16.6628	0.720862	0.000549057	0.026127
Zm00001eb430780	126.422	71.6697	0.818808	2.56109e-05	0.0022584
Zm00001eb137480	359.864	80.9257	2.15278	4.7149e-09	1.75059e-06
Zm00001eb395520	7.32727	4.72227	0.633795	0.00925192	0.199595
Zm00001eb021410	0.19045	0.0174523	3.44792	0.0210492	1
Zm00001eb387520	17.1002	11.3507	0.591238	0.00720246	0.164566
Zm00001eb280210	42.1004	30.5605	0.462166	0.0221573	0.339248
Zm00001eb044590	245.665	149.639	0.715203	0.000378	0.0194288
Zm00001eb015930	88.1785	67.8487	0.378106	0.0133197	0.251744
Zm00001eb363430	42.8776	32.9685	0.379135	0.0250095	0.360613
Zm00001eb146080	13.1862	8.35213	0.65881	0.00986686	0.208986
Zm00001eb080560	6.58139	4.12916	0.672544	0.0334722	0.424694
Zm00001eb023070	911.565	557.481	0.709422	0.0148438	0.267419
Zm00001eb252230	12.4602	7.04245	0.823182	0.00368357	0.10457
Zm00001eb119640	3.30252	2.04386	0.692268	0.00862045	0.189744
Zm00001eb153340	262.295	175.725	0.577868	0.013695	0.2552
Zm00001eb410350	229.659	146.373	0.649848	0.00507627	0.129748
Zm00001eb143910	10.219	5.35927	0.93114	0.0225254	0.341365
Zm00001eb137340	29.0004	15.8233	0.874018	0.000136406	0.00844104
Zm00001eb110400	203.028	155.864	0.38139	0.0363995	0.444861
Zm00001eb143920	1.06515	0.462215	1.20442	0.0296852	0.396426
Zm00001eb124150	0.331443	0.024975	3.73021	0.0256356	0.365033
Zm00001eb224740	37.7672	22.9456	0.718913	0.010571	0.218051
Zm00001eb013220	41.4787	33.0351	0.328372	0.0284598	0.388337
Zm00001eb287440	13.1424	8.66484	0.600988	0.00111586	0.04479
Zm00001eb254450	0.896444	0.0001	13.13	9.28105e-05	0.00629549
Zm00001eb243290	5.47564	2.95122	0.891717	0.0369437	0.4478
Zm00001eb036470	3.29815	1.5097	1.12739	0.000468451	0.0229492
Zm00001eb031290	21.9152	14.242	0.621776	0.0024515	0.0796965
Zm00001eb298980	53.165	42.9437	0.308031	0.0464331	0.506475
Zm00001eb233760	1.92197	0.819206	1.23028	0.0185408	0.305064
Zm00001eb116160	17.7146	3.99948	2.14705	7.17909e-05	0.00515469
Zm00001eb060390	5.29633	3.76561	0.492111	0.0409345	0.469703
Zm00001eb006850	40.7977	32.8016	0.314719	0.0441284	0.490822
Zm00001eb408210	35.2712	26.9288	0.389341	0.0427805	0.482294
Zm00001eb297100	30.0134	21.493	0.481741	0.0409655	0.469713
Zm00001eb418390	9.8713	5.11626	0.948151	0.0225563	0.34151
Zm00001eb397110	107.653	79.6087	0.435392	0.0167807	0.28605
Zm00001eb403420	0.456488	0.0001	12.1564	0.000503814	1
Zm00001eb212890	15.8709	9.07161	0.80695	0.019426	0.3127
Zm00001eb386230	7.73367	4.00636	0.948863	0.0282785	0.387509
Zm00001eb201250	68.282	44.9154	0.604296	0.00923603	0.199405
Zm00001eb125980	87.6167	57.9454	0.596511	0.00595119	0.144643
Zm00001eb128960	37.8046	22.2069	0.767556	0.000278923	0.0150211
Zm00001eb010070	41.1538	25.4109	0.69558	0.00101571	0.0415983
Zm00001eb404890	5.30165	2.60384	1.0258	0.0499632	0.527248
Zm00001eb041760	48.8118	34.0158	0.521024	0.00286274	0.0881885
Zm00001eb411940	0.239483	0.0100793	4.57045	0.0270529	0.376977
Zm00001eb427560	78.1543	60.8045	0.362148	0.0187969	0.307206
Zm00001eb232400	22.1168	14.4508	0.613988	0.0110569	0.224948
Zm00001eb322290	114.545	83.6776	0.453003	0.0396861	0.46461
Zm00001eb412370	161.145	125.758	0.357706	0.0356555	0.439548
Zm00001eb013610	60.9947	40.099	0.605116	0.00572877	0.14106
Zm00001eb308660	11.4776	8.69318	0.400866	0.0148503	0.267419
Zm00001eb256960	24.8104	12.67	0.969535	0.00439268	0.118481
Zm00001eb266960	38.8426	20.3943	0.929475	0.0423523	0.479382
Zm00001eb405180	0.640891	0.074426	3.1062	0.0146913	0.26627
Zm00001eb214540	75.8979	39.9583	0.925563	2.8667e-05	0.00247378
Zm00001eb015280	31.8804	22.3254	0.513981	0.0159134	0.277097
Zm00001eb402630	37.5218	25.4756	0.558613	0.041001	0.469929
Zm00001eb336260	0.334418	0.0284863	3.55331	0.0159889	1
Zm00001eb333240	250.36	186.635	0.423785	0.0238438	0.352623
Zm00001eb067620	46.3418	35.2609	0.394244	0.0481476	0.517771
Zm00001eb334140	38.9717	24.1849	0.688318	0.0174372	0.292837
Zm00001eb279290	158.33	102.642	0.625316	0.00301807	0.0912795
Zm00001eb398820	26.6004	11.9579	1.15349	0.0042598	0.11558
Zm00001eb215030	16.7896	10.2705	0.709057	0.0161994	0.279179
Zm00001eb379890	5.98146	4.08846	0.548941	0.0475897	0.51491
Zm00001eb391230	1.31241	0.347376	1.91765	0.00464111	0.122521
Zm00001eb312210	7.47123	5.23688	0.512639	0.010127	0.21199
Zm00001eb322310	12.4353	8.90737	0.481371	0.0160821	0.278512
Zm00001eb153550	3.28655	1.62298	1.01792	0.0197367	0.315885
Zm00001eb283440	485.008	351.046	0.466346	0.0312605	0.407923
Zm00001eb067710	53.1513	27.8836	0.930688	1.71796e-05	0.0016489
Zm00001eb073980	52.2018	39.7194	0.394254	0.0186408	0.30564
Zm00001eb239450	3.52301	1.77602	0.988164	0.00451619	0.120224
Zm00001eb148750	12.0127	8.59428	0.483117	0.0403113	0.465999
Zm00001eb293610	6.90769	5.36734	0.363996	0.0349556	0.434145
Zm00001eb442220	1.28859	0.556093	1.21239	0.0124046	0.242237
Zm00001eb151670	1.25576	0.67748	0.890312	0.0183904	0.303296
Zm00001eb013680	8.57898	5.38896	0.670799	0.0348359	0.433926
Zm00001eb194480	15.781	8.14912	0.95347	5.17265e-06	0.000631869
Zm00001eb314110	1.18812	0.154694	2.94119	0.0175738	0.294127
Zm00001eb040570	490.641	153.705	1.67451	1.78069e-07	4.01981e-05
Zm00001eb011960	21.0536	16.0092	0.395162	0.0433646	0.48579
Zm00001eb207870	4.29505	2.21862	0.953015	7.9339e-05	0.00552787
Zm00001eb339340	46.6574	29.4608	0.663311	0.00294288	0.0897754
Zm00001eb088610	1.27662	0.475494	1.42483	0.0393992	0.463568
Zm00001eb383830	5.45317	3.60817	0.595826	0.0316105	0.410153
Zm00001eb142720	120.356	88.1623	0.449076	0.00583558	0.142694
Zm00001eb089250	2.88363	1.69286	0.768421	0.0401965	0.465861
Zm00001eb387030	96.8092	73.9805	0.387998	0.0168982	0.286903
Zm00001eb073660	25.7273	15.334	0.746559	0.0295552	0.395307
Zm00001eb039010	2839.45	1446.69	0.972856	0.0051073	0.129953
Zm00001eb259460	10.949	7.69936	0.507996	0.0379917	0.45503
Zm00001eb403500	0.301164	0.041564	2.85714	0.0196648	1
Zm00001eb024900	72.026	48.171	0.580354	0.0310349	0.406189
Zm00001eb292840	3.20245	1.81246	0.821223	0.0159582	0.277113
Zm00001eb306260	118.236	80.9129	0.547229	0.00492119	0.126703
Zm00001eb023220	0.216084	0.0001	11.0774	0.0321526	1
Zm00001eb326490	8.97178	4.94131	0.860501	0.00576004	0.141706
Zm00001eb330920	28.9402	21.311	0.441479	0.00693389	0.161037
Zm00001eb283750	25.596	15.1867	0.753113	0.00820856	0.182242
Zm00001eb325910	17.0353	12.2314	0.477934	0.0416247	0.474381
Zm00001eb315140	0.406147	0.048591	3.06324	0.0146918	0.26627
Zm00001eb366880	40.8897	34.1891	0.258201	0.0465852	0.507153
Zm00001eb235980	36.8018	25.2536	0.543286	0.0489366	0.521289
Zm00001eb006220	134.438	0.0001	20.3585	4.55077e-13	7.55374e-10
Zm00001eb249980	37.4529	27.2687	0.45783	0.0353792	0.437518
Zm00001eb092120	1.20986	0.497992	1.28065	0.0291244	0.391535
Zm00001eb002830	49.4538	33.4035	0.566085	0.000624962	0.0291511
Zm00001eb380680	44.7901	31.9072	0.489299	0.00342239	0.0994571
Zm00001eb224210	43.2156	26.2244	0.720646	0.0290628	0.391167
Zm00001eb342740	14.9395	6.56772	1.18567	0.0406434	0.467922
Zm00001eb186820	101.2	66.5349	0.605021	0.0303247	0.400803
Zm00001eb413720	0.678058	0.0633527	3.41993	0.0247573	1
Zm00001eb411380	3781	2175.8	0.79722	0.000728125	0.0330857
Zm00001eb104140	3.53441	1.79003	0.981482	0.0211227	0.32916
Zm00001eb014210	16.6359	7.06946	1.23463	0.0167554	0.285856
Zm00001eb263260	0.298837	0.0001	11.5451	0.0480907	1
Zm00001eb055490	77.6802	58.967	0.397637	0.024959	0.360613
Zm00001eb252690	125.612	93.4588	0.426569	0.0138606	0.256596
Zm00001eb366410	49.0598	30.7336	0.674722	5.83041e-05	0.00444655
Zm00001eb207770	16.8032	8.17297	1.03981	0.000143889	0.00884587
Zm00001eb090230	179.437	96.0681	0.901348	0.00285948	0.0881844
Zm00001eb372710	6.53767	2.12036	1.62446	0.0264071	0.372019
Zm00001eb371240	17.5467	11.7077	0.583737	0.0138191	0.256375
Zm00001eb344970	18.5864	12.7147	0.54775	0.0316288	0.410153
Zm00001eb172800	5.16305	2.95201	0.806528	0.0327084	0.419149
Zm00001eb036990	4.41979	1.63584	1.43394	1.51392e-05	0.00150777
Zm00001eb408790	92.6154	68.238	0.440676	0.00478832	0.124584
Zm00001eb226400	0.768083	0.292874	1.39098	0.0120412	0.237774
Zm00001eb135030	1.71985	0.241584	2.83169	0.0316721	0.410153
Zm00001eb286090	41.1351	34.1188	0.269802	0.0428641	0.482657
Zm00001eb188600	468.695	383.413	0.289752	0.0439553	0.489476
Zm00001eb300860	0.319158	0.0203377	3.97205	0.0460715	1
Zm00001eb312830	13.6291	7.69885	0.823975	0.019747	0.315885
Zm00001eb363550	1.79446	0.581476	1.62576	0.0348754	0.433926
Zm00001eb430000	6.41293	4.12238	0.637505	0.0249762	0.360613
Zm00001eb401980	1.66614	0.738058	1.1747	0.0226734	0.34273
Zm00001eb198760	1.65013	0.0126437	7.02802	0.0365573	0.445346
Zm00001eb328590	62.2778	48.9492	0.347433	0.00702945	0.161924
Zm00001eb346800	0.270155	0.0001	11.3996	0.00358399	1
Zm00001eb432570	67.9134	41.8934	0.696972	0.0105205	0.217485
Zm00001eb200130	62.7436	50.097	0.324745	0.024986	0.360613
Zm00001eb271280	41.4451	31.5206	0.394906	0.0253053	0.363023
Zm00001eb075000	26.7549	13.021	1.03896	0.000115032	0.00736047
Zm00001eb390740	0.264139	0.0001	11.3671	0.0412514	1
Zm00001eb354880	28.474	20.8196	0.451699	0.0356034	0.439098
Zm00001eb072840	30.4277	20.9655	0.537364	0.00223506	0.0745495
Zm00001eb168430	75.2539	57.2364	0.394832	0.0125805	0.243816
Zm00001eb406860	45.1987	34.7479	0.379353	0.0336487	0.425565
Zm00001eb159430	0.980051	0.337203	1.53924	0.0294982	0.395055
Zm00001eb178190	344.864	247.733	0.477244	0.0128791	0.246891
Zm00001eb433540	2.84167	1.2439	1.19187	0.0131474	0.250563
Zm00001eb177310	82.8275	55.815	0.569458	0.00299414	0.0908481
Zm00001eb398770	25.1298	14.8035	0.763459	0.00265767	0.0841232
Zm00001eb216870	64.5956	41.6453	0.633283	0.00230179	0.0761611
Zm00001eb039350	0.385645	0.0596357	2.69303	0.0192372	1
Zm00001eb080210	4.61909	1.67009	1.46768	0.0217322	0.335517
Zm00001eb055410	74.7604	43.8025	0.77126	0.00446727	0.119442
Zm00001eb326590	12.6132	7.75621	0.701511	0.00225779	0.0752188
Zm00001eb114200	139.822	113.172	0.305079	0.0262454	0.370063
Zm00001eb052470	12.6961	9.13885	0.474299	0.0301233	0.399446
Zm00001eb007810	41.5848	32.6031	0.35105	0.0389068	0.460597
Zm00001eb304580	19.3204	14.3052	0.43358	0.0287956	0.390839
Zm00001eb291850	469.564	332.313	0.498777	0.0028902	0.0887439
Zm00001eb117800	1.20933	0.0640597	4.23865	0.0427012	0.482181
Zm00001eb239550	19.5768	14.0312	0.480501	0.0356878	0.439755
Zm00001eb264430	0.57791	0.0001	12.4966	0.0155664	1
Zm00001eb236850	272.08	148.31	0.875415	0.0244833	0.35667
Zm00001eb019680	19.5944	12.6176	0.635	0.016823	0.286143
Zm00001eb113490	5.35503	1.78167	1.58767	0.000937294	0.0397413
Zm00001eb341150	30.1229	21.1328	0.511371	0.0107331	0.220354
Zm00001eb144910	178.405	123.586	0.529636	0.0269571	0.376386
Zm00001eb012010	23.9925	17.8902	0.423419	0.00346804	0.100371
Zm00001eb282950	79.0207	58.8884	0.424248	0.00895516	0.195099
Zm00001eb010560	57.6546	39.813	0.534196	0.00161496	0.0588596
Zm00001eb122460	14.9027	11.9135	0.322976	0.0372634	0.449551
Zm00001eb296640	9.33497	4.98529	0.904969	0.0397443	0.46461
Zm00001eb384690	7.6556	5.97931	0.356537	0.0298519	0.397029
Zm00001eb247110	5.43205	3.41761	0.668507	0.0302746	0.40051
Zm00001eb144140	0.528497	0.18915	1.48236	0.0436403	0.487121
Zm00001eb309540	11.3129	8.16254	0.470876	0.00469457	0.123229
Zm00001eb281110	0.472672	0.105342	2.16576	0.0480655	0.517674
Zm00001eb286460	27.6312	21.7094	0.347982	0.0311828	0.407558
Zm00001eb056870	334.28	204.723	0.707387	0.00987016	0.208986
Zm00001eb406570	53.215	31.4218	0.760067	0.0420101	0.476273
Zm00001eb245720	2.02669	0.891214	1.18528	0.00704251	0.162061
Zm00001eb202290	0.525468	0.0001	12.3594	0.00749981	1
Zm00001eb277560	30.8905	22.6937	0.444868	0.0132664	0.251079
Zm00001eb084430	48.5984	34.5545	0.492037	0.0243093	0.355061
Zm00001eb122050	4.5874	2.74846	0.739053	0.0460226	0.50399
Zm00001eb267600	21.5432	15.1997	0.503194	0.0202882	0.320904
Zm00001eb417240	307.396	192.275	0.676923	1.37074e-05	0.00140143
Zm00001eb209000	205.048	165.51	0.309043	0.0377736	0.453959
Zm00001eb020520	1.3361	0.647414	1.04526	0.00987234	0.208986
Zm00001eb085330	79.1782	54.8064	0.53076	0.0153162	0.273148
Zm00001eb313190	4.93266	2.72809	0.854478	0.000808934	0.0355553
Zm00001eb294480	29.7015	15.9144	0.900206	0.0306765	0.403574
Zm00001eb356070	8.45219	3.32893	1.34427	0.000430163	0.0215156
Zm00001eb013430	44.8423	29.8778	0.585783	0.00531664	0.133593
Zm00001eb304560	370.774	233.286	0.668438	0.00125663	0.0485749
Zm00001eb216260	348.509	223.545	0.640629	0.00251139	0.0812687
Zm00001eb312900	38.3919	27.0922	0.502923	0.0295265	0.395246
Zm00001eb037460	12.8271	10.1545	0.337086	0.0452517	0.499091
Zm00001eb097100	106.618	81.1415	0.393938	0.0487537	0.520426
Zm00001eb332470	63.5796	45.2526	0.490562	0.014227	0.260349
Zm00001eb398540	20.0959	13.8794	0.533957	0.00549539	0.136559
Zm00001eb090260	2.93045	1.66688	0.813971	0.0129123	0.247359
Zm00001eb348780	3.12344	1.47841	1.07909	0.00128705	0.0490799
Zm00001eb297150	91.2108	66.6434	0.452743	0.00580748	0.142377
Zm00001eb131850	0.149177	0.0001	10.5428	0.0380984	1
Zm00001eb412910	24.1942	17.7253	0.448846	0.00733438	0.166792
Zm00001eb218490	2.12589	1.07349	0.985764	0.0298538	0.397029
Zm00001eb112150	44.4649	17.6305	1.33459	2.05035e-09	9.18362e-07
Zm00001eb262890	15.1052	9.36821	0.689204	0.0335209	0.424793
Zm00001eb222610	6.7766	4.05415	0.741163	0.0240731	0.354496
Zm00001eb140550	2.27405	1.37637	0.724392	0.0385749	0.458126
Zm00001eb251890	1.4773	0.548704	1.42886	0.0227667	0.34373
Zm00001eb314830	51.2318	34.6425	0.564498	0.00104185	0.0425454
Zm00001eb059240	9.65411	5.32703	0.857811	0.0135693	0.25408
Zm00001eb129020	27.4693	16.1694	0.764557	0.0113574	0.22859
Zm00001eb149420	22.0084	14.0066	0.65195	0.0231553	0.346997
Zm00001eb179930	0.275945	0.0224543	3.61931	0.00744447	0.168594
Zm00001eb409540	11.6512	8.25441	0.497242	0.0448598	0.496218
Zm00001eb368740	25.8445	18.5667	0.477145	0.00946624	0.202516
Zm00001eb006350	89.2229	66.6477	0.42086	0.0294945	0.395055
Zm00001eb127230	55.9855	42.0769	0.412024	0.0111447	0.226138
Zm00001eb083540	469.248	315.608	0.572215	0.0156661	0.275714
Zm00001eb003580	9.67729	6.83791	0.501049	0.00750387	0.169465
Zm00001eb264770	23.6312	15.8113	0.579735	0.0402347	0.465861
Zm00001eb137240	293.867	173.114	0.763441	0.0217196	0.335517
Zm00001eb379200	5.82999	3.34066	0.803363	0.00634585	0.151623
Zm00001eb031130	3.93018	2.49057	0.658118	0.0469357	0.510182
Zm00001eb105400	2.71573	1.69342	0.681401	0.0162072	0.279179
Zm00001eb184300	2.6764	1.43651	0.897724	0.0383625	0.456448
Zm00001eb079750	10.0447	6.57302	0.611809	0.0241437	0.354496
Zm00001eb312080	100.494	74.511	0.431591	0.0190287	0.309664
Zm00001eb284840	106.167	80.7666	0.394499	0.0379705	0.454969
Zm00001eb191180	16.0652	11.9927	0.421779	0.0198028	0.316598
Zm00001eb388980	1.07054	0.0001	13.386	0.0180429	1
Zm00001eb333290	109.315	70.0597	0.641833	0.00126763	0.0487996
Zm00001eb319410	5.04507	0.142734	5.14348	6.10794e-41	1.72354e-36
Zm00001eb059160	31.3199	23.7529	0.398974	0.0221059	0.33883
Zm00001eb167950	2.85686	0.929495	1.61991	0.0255069	0.364373
Zm00001eb154750	0.952686	0.042349	4.4916	0.0102901	1
Zm00001eb420850	1.83519	0.807151	1.18502	0.00792466	0.177624
Zm00001eb136840	43.2752	27.2936	0.664978	5.97243e-05	0.00450615
Zm00001eb249600	60.0315	27.7581	1.11281	0.0021698	0.0730637
Zm00001eb420440	1.47347	0.459659	1.68059	0.00195767	0.0679157
Zm00001eb302440	0.340299	0.0001	11.7326	6.06013e-05	0.00454892
Zm00001eb124210	156.795	106.123	0.563138	0.0232172	0.347592
Zm00001eb238330	188.863	148.623	0.345681	0.0152188	0.2718
Zm00001eb192970	2.67927	0.834431	1.68297	0.000826161	0.0361997
Zm00001eb394390	94.3889	57.6302	0.711792	0.00375312	0.105274
Zm00001eb160630	13.2744	9.2386	0.522903	0.016494	0.28216
Zm00001eb366460	4.97602	1.91067	1.38091	0.0069179	0.160798
Zm00001eb264120	0.331797	0.0001	11.6961	0.0191809	1
Zm00001eb134090	158.079	96.7389	0.708478	0.000168611	0.0101447
Zm00001eb121460	26.3238	17.4506	0.593093	0.00246962	0.080193
Zm00001eb130340	6.45138	4.23904	0.605871	0.0359737	0.442357
Zm00001eb089930	13.4328	5.23496	1.35951	0.0288679	0.39088
Zm00001eb172290	22.6144	8.72946	1.37328	0.000961601	0.0403787
Zm00001eb211100	57.7278	37.2809	0.630831	0.000759845	0.0341967
Zm00001eb260180	1.93693	1.16498	0.733465	0.0346485	0.432288
Zm00001eb388580	0.271152	0.0333833	3.0219	0.0300194	1
Zm00001eb255290	2.90503	1.25244	1.21381	0.00478911	0.124584
Zm00001eb244930	12.3567	8.72744	0.501663	0.0114478	0.230235
Zm00001eb080730	39.5916	28.6471	0.466807	0.0190126	0.309664
Zm00001eb061440	34.4279	28.4674	0.274269	0.0484108	0.518821
Zm00001eb345740	113.426	79.7085	0.508941	0.00333604	0.0978549
Zm00001eb039040	159.096	107.683	0.56311	0.0240065	0.354482
Zm00001eb075030	51.1503	39.5747	0.370166	0.0251646	0.362093
Zm00001eb118350	1.76851	0.922585	0.938781	0.00216053	0.0728385
Zm00001eb292890	55.5146	29.3629	0.918872	0.0435553	0.486883
Zm00001eb207570	21.6257	14.4664	0.580038	0.0122664	0.240371
Zm00001eb109270	14.8106	10.9253	0.438955	0.0403042	0.465999
Zm00001eb118870	3.93293	1.93697	1.0218	0.00277261	0.08607
Zm00001eb192660	4.45509	3.05236	0.545529	0.0255291	0.364373
Zm00001eb029590	18.8332	13.5932	0.470396	0.0207045	0.325301
Zm00001eb146210	29.6145	20.7135	0.515737	0.0455372	0.501354
Zm00001eb430480	40.6136	29.4597	0.463219	0.0397258	0.46461
Zm00001eb070250	341.325	275.258	0.31036	0.0158531	0.276806
Zm00001eb159400	21.5455	14.9308	0.529099	0.0229627	0.345395
Zm00001eb073550	2.72826	0.290993	3.22892	0.00113367	0.0451836
Zm00001eb429540	1604.99	835.78	0.941368	0.00382662	0.106805
Zm00001eb379090	86.719	70.2979	0.302866	0.0493513	0.523532
Zm00001eb063800	101.031	76.2882	0.405264	0.00569309	0.140581
Zm00001eb403360	24.3318	14.1028	0.786858	0.0032375	0.0957607
Zm00001eb339490	7.37951	5.15443	0.51771	0.026121	0.369097
Zm00001eb058680	0.153529	0.00209433	6.19588	0.0452873	1
Zm00001eb438800	10.225	7.40389	0.465747	0.0484912	0.519288
Zm00001eb194110	10.497	7.16145	0.55165	0.0413536	0.472037
Zm00001eb125150	12.2925	8.55548	0.522859	0.00749837	0.169465
Zm00001eb196620	17.7312	7.51077	1.23925	1.19292e-06	0.000198009
Zm00001eb030110	10.4092	5.4111	0.94387	0.000245185	0.0136462
Zm00001eb362010	9.36281	6.23416	0.586746	0.040027	0.465861
Zm00001eb423900	1.01139	0.050554	4.32237	7.48737e-05	0.00530851
Zm00001eb428020	11.4313	6.11928	0.901561	0.0189274	0.308903
Zm00001eb328530	13.2489	10.1355	0.386459	0.0468212	0.509154
Zm00001eb038800	10.0579	4.21707	1.25401	0.0476391	0.515247
Zm00001eb220750	30.3525	23.97	0.340585	0.039257	0.463107
Zm00001eb364140	0.490264	0.0515123	3.25057	0.0267501	1
Zm00001eb165610	227.881	98.3102	1.21287	2.09095e-06	0.000310539
Zm00001eb192160	16.0514	6.59132	1.28406	0.0140615	0.258444
Zm00001eb159850	102.508	66.9944	0.613623	0.0232629	0.347816
Zm00001eb186100	44.6938	28.4931	0.649465	0.0170029	0.288254
Zm00001eb104870	3.52754	2.0451	0.786494	0.0290404	0.391167
Zm00001eb298080	7.49083	5.47031	0.453504	0.0333264	0.423415
Zm00001eb316960	72.1471	47.7716	0.594789	0.0131079	0.250256
Zm00001eb151560	19.0745	7.16521	1.41257	0.00044468	0.0220246
Zm00001eb161490	53.748	42.4944	0.338938	0.0260583	0.368729
Zm00001eb280950	254.657	162.138	0.65133	0.00572706	0.14106
Zm00001eb087100	0.504167	0.0582083	3.1146	0.0138101	0.256375
Zm00001eb069110	5.5662	3.27331	0.765941	0.0349322	0.434145
Zm00001eb063720	140.653	102.072	0.462548	0.0156773	0.275714
Zm00001eb397050	29.3851	20.8871	0.49247	0.0110538	0.224948
Zm00001eb323330	1.43875	0.458942	1.64843	0.00587162	0.143283
Zm00001eb013950	30.8806	22.8952	0.431656	0.0303256	0.400803
Zm00001eb361460	63.7755	46.8611	0.444612	0.0485492	0.519516
Zm00001eb148980	61.6341	45.4499	0.439452	0.00467568	0.122962
Zm00001eb366850	6.99517	3.84217	0.86444	0.0192123	0.311391
Zm00001eb368280	5.4171	3.31005	0.710669	0.0142488	0.260578
Zm00001eb193790	48.754	28.2425	0.787652	0.00323222	0.0957607
Zm00001eb254390	76.4938	58.909	0.376856	0.0384293	0.456781
Zm00001eb177340	10.3306	7.9385	0.37998	0.0483034	0.518458
Zm00001eb272480	4.04441	2.30738	0.809672	0.0109352	0.223721
Zm00001eb141510	11.2616	6.97295	0.691572	0.00115441	0.0456873
Zm00001eb244120	106.029	56.5167	0.907709	0.00071086	0.0325018
Zm00001eb264630	121.398	58.8512	1.0446	0.000124883	0.00783099
Zm00001eb346040	76.499	61.1627	0.322788	0.0294181	0.39492
Zm00001eb279450	139.085	92.1988	0.59315	0.000746997	0.033726
Zm00001eb073260	21.431	10.0035	1.0992	0.000171107	0.0102512
Zm00001eb120680	0.146373	0.0001	10.5154	0.0363397	1
Zm00001eb288850	62.4263	31.1022	1.00514	0.00619685	0.149073
Zm00001eb119550	0.344778	0.0001	11.7515	0.0339775	1
Zm00001eb146220	109.776	79.7392	0.461197	0.0400068	0.465861
Zm00001eb152930	0.416358	0.0001	12.0236	0.0102559	1
Zm00001eb325100	8.54306	5.9858	0.51321	0.0290003	0.391167
Zm00001eb429740	31.8454	26.3662	0.272396	0.0286664	0.390024
Zm00001eb102800	26.6026	21.1263	0.332527	0.0217885	0.335656
Zm00001eb286900	4.37096	3.02687	0.530124	0.0364382	0.444861
Zm00001eb107350	5.70864	3.94845	0.53186	0.0140634	0.258444
Zm00001eb284140	187.47	128.353	0.546546	0.0200936	0.319257
Zm00001eb238010	15.6461	9.02088	0.794464	0.0133833	0.252543
Zm00001eb113730	69.9634	53.8527	0.377582	0.00961513	0.204924
Zm00001eb254190	20.6069	14.2318	0.53401	0.0112808	0.227433
Zm00001eb414700	62.8388	47.3234	0.4091	0.0443778	0.492045
Zm00001eb065720	27.0832	21.0777	0.36168	0.0371368	0.449176
Zm00001eb043230	7.66938	4.87607	0.65339	0.0115458	0.230736
Zm00001eb035340	11.6846	7.36224	0.666386	0.0139539	0.25725
Zm00001eb096680	614.689	464.864	0.403049	0.0106635	0.219477
Zm00001eb133890	70.2102	55.8518	0.330077	0.0324271	0.417018
Zm00001eb410950	5.15041	3.59678	0.517983	0.0334035	0.424204
Zm00001eb268360	0.452247	0.0207197	4.44804	0.0433564	1
Zm00001eb404790	79.7862	9.77251	3.02934	0.00896052	0.195099
Zm00001eb064650	33.0794	24.0998	0.456912	0.0326799	0.419057
Zm00001eb082130	7.09934	2.60038	1.44896	2.21431e-05	0.00202211
Zm00001eb413630	177.537	110.893	0.678948	0.0049504	0.127339
Zm00001eb215680	2.04229	0.531474	1.94212	0.00109606	0.0441839
Zm00001eb052750	216.655	158.05	0.455019	0.00918023	0.198656
Zm00001eb308860	12.5845	5.0295	1.32316	1.17688e-09	5.72573e-07
Zm00001eb014490	10.8025	6.1039	0.823561	8.90224e-05	0.00606772
Zm00001eb226750	0.426713	0.0001	12.0591	0.0282809	1
Zm00001eb374390	5.6751	3.5645	0.670946	0.0117899	0.234287
Zm00001eb121160	4.46324	2.66683	0.742963	0.0183872	0.303296
Zm00001eb324900	57.8165	37.4135	0.627924	0.00320879	0.0954116
Zm00001eb254600	3.22395	1.78249	0.854932	0.0100823	0.211668
Zm00001eb300580	11.6215	6.89533	0.753106	0.0155153	0.274489
Zm00001eb101420	10.5119	5.65505	0.894408	0.0327806	0.419503
Zm00001eb151760	1.56267	0.67054	1.22062	0.0159534	0.277113
Zm00001eb054980	158.126	117.151	0.432708	0.0147602	0.266991
Zm00001eb057860	3.10506	0.818946	1.92278	0.00151232	0.0560772
Zm00001eb214560	333.358	220.778	0.594473	0.000138244	0.00853603
Zm00001eb313300	10.4055	5.92014	0.813647	0.0318443	0.411381
Zm00001eb250900	18.6497	12.1156	0.622293	0.00181973	0.0646473
Zm00001eb393070	232.339	173.469	0.421554	0.0486092	0.51985
Zm00001eb426920	4.76652	3.43089	0.474351	0.0228254	0.344161
Zm00001eb299460	633.093	162.618	1.96093	1.26506e-10	9.91595e-08
Zm00001eb385210	111.517	76.9158	0.535911	0.00392849	0.108713
Zm00001eb281940	5.42055	3.12054	0.796643	0.0393491	0.46342
Zm00001eb259930	0.996099	0.0001	13.2821	1.42339e-06	0.000225647
Zm00001eb314490	127.699	108.137	0.239883	0.0446836	0.494658
Zm00001eb412670	1.96836	0.936586	1.07151	0.0124807	0.24285
Zm00001eb156060	33.2315	24.2184	0.456447	0.0470273	0.510232
Zm00001eb187340	17.7282	8.55871	1.05058	0.00457113	0.121406
Zm00001eb321900	12.3557	8.62735	0.518189	0.00991872	0.209653
Zm00001eb289960	14.9055	11.6449	0.356143	0.0364304	0.444861
Zm00001eb016820	1.21887	0.0001	13.5733	0.0336278	1
Zm00001eb422410	79.1277	57.2178	0.467719	0.015213	0.2718
Zm00001eb059560	32.9557	25.289	0.382016	0.0196667	0.315316
Zm00001eb347610	17.2927	13.5659	0.350183	0.0366202	0.445729
Zm00001eb078640	180.176	124.409	0.534319	0.027486	0.381318
Zm00001eb237650	105.762	64.7899	0.706977	0.0407059	0.468259
Zm00001eb325020	2.17752	1.4044	0.632731	0.047935	0.517258
Zm00001eb003730	2396.95	1952.61	0.295797	0.0396301	0.46461
Zm00001eb266120	1.11118	0.308456	1.84896	0.0139521	0.25725
Zm00001eb306030	328.259	196.454	0.740643	0.000232602	0.0131009
Zm00001eb225110	2.85822	1.77392	0.688173	0.0115035	0.23038
Zm00001eb169480	3.13938	1.92126	0.708425	0.0370486	0.448685
Zm00001eb359200	6.62546	4.33072	0.613415	0.0474123	0.513779
Zm00001eb311500	3.28875	1.1913	1.465	0.00993974	0.209783
Zm00001eb155390	1.64272	0.273138	2.58839	0.0135149	0.25349
Zm00001eb014090	18.5539	9.52226	0.962346	0.00959955	0.204747
Zm00001eb076600	222.103	166.962	0.411712	0.0335944	0.425098
Zm00001eb412150	10.4317	4.41396	1.24082	0.0111364	0.226138
Zm00001eb012960	15.5426	11.6129	0.420501	0.0437715	0.487814
Zm00001eb292860	15.5194	10.1944	0.606305	0.0337382	0.425961
Zm00001eb277070	36.485	21.3656	0.772012	0.00197596	0.0681171
Zm00001eb104040	21.7021	14.1434	0.617712	0.000739808	0.0335087
Zm00001eb276150	27.4999	10.8847	1.33712	0.000258575	0.0141679
Zm00001eb150730	167.384	134.048	0.320415	0.0491084	0.522133
Zm00001eb279890	14.1474	9.40981	0.588297	0.0325856	0.418525
Zm00001eb124780	10.0273	6.52178	0.620591	0.0302521	0.40051
Zm00001eb247590	526.776	379.495	0.473107	0.0278958	0.38511
Zm00001eb084940	18.7605	14.4229	0.37934	0.0292022	0.392207
Zm00001eb043120	14.9519	8.28824	0.851192	0.00364115	0.104099
Zm00001eb341590	0.334468	0.0001	11.7077	0.0415002	1
Zm00001eb084360	23.4309	16.8088	0.479197	0.0289674	0.391167
Zm00001eb089330	0.185945	0.0001	10.8607	0.0452877	1
Zm00001eb175940	4.89806	1.92207	1.34955	0.00700592	0.161848
Zm00001eb113220	0.727441	0.203758	1.83597	0.00788155	0.17693

## Sheet: 9 mM K_AMF vs 9 mM K_NM
Gene id	MeanTPM (9 mM K_AMF)	MeanTPM (9 mM K_NM)	log2FoldChange	pValue	qValue
Zm00001eb343690	79.464	56.796	0.484513	0.00482797	0.290794
Zm00001eb192490	154.559	106.062	0.543243	0.0442342	0.813441
Zm00001eb345960	14.9519	10.9018	0.455769	0.0130053	0.48045
Zm00001eb332160	184.274	154.782	0.251613	0.0165073	0.541199
Zm00001eb326350	29.7884	22.2326	0.422072	0.0406391	0.786551
Zm00001eb136200	51.7914	42.1883	0.29587	0.0296449	0.709624
Zm00001eb328570	1.31605	0.610924	1.10715	0.0189667	0.581784
Zm00001eb400920	3.07326	1.88175	0.707694	0.0378981	0.77019
Zm00001eb048090	13.7996	8.8068	0.647936	0.0265026	0.672924
Zm00001eb391680	5.55959	2.50515	1.15008	0.0381664	0.77019
Zm00001eb063650	6.86218	5.40752	0.343702	0.0195757	0.589921
Zm00001eb371310	0.0843997	0.0001	9.72109	0.0489324	0.839701
Zm00001eb012070	12.2755	9.53018	0.365207	0.0361533	0.757684
Zm00001eb258400	27.043	16.0815	0.749854	0.016959	0.543516
Zm00001eb223900	101.847	78.0061	0.384739	0.018427	0.57277
Zm00001eb315660	331.459	251.036	0.400934	0.0429618	0.804646
Zm00001eb163900	0.652662	0.04193	3.96028	0.00176948	0.164083
Zm00001eb334940	14.3491	9.58149	0.582641	0.012617	0.471825
Zm00001eb269660	2.32608	0.90763	1.35772	0.00182849	0.165912
Zm00001eb424720	4.19586	2.63001	0.673899	0.0191022	0.584269
Zm00001eb315440	36.3488	25.9694	0.485097	0.0277288	0.689169
Zm00001eb306170	0.150046	0.0001	10.5512	0.028357	0.697058
Zm00001eb203620	31.2203	18.8444	0.728351	0.000671937	0.0916141
Zm00001eb403720	81.0197	63.3504	0.35492	0.0164471	0.541122
Zm00001eb309780	5.81468	3.75768	0.629858	0.00991781	0.430035
Zm00001eb037210	48.1834	31.2727	0.623631	0.00176712	0.164083
Zm00001eb318920	72.1289	50.4493	0.515743	0.0296284	0.709624
Zm00001eb083140	413.67	294.431	0.490554	0.0164443	0.541122
Zm00001eb204530	6.34151	3.71681	0.770763	0.0312003	0.722253
Zm00001eb022730	15.9075	10.3253	0.623524	0.0111164	0.446874
Zm00001eb264590	10.9912	7.27213	0.595901	0.00894977	0.410808
Zm00001eb101230	729.505	508.38	0.521011	0.0219099	0.616255
Zm00001eb309110	107.926	61.9571	0.800702	0.00012226	0.0309761
Zm00001eb065710	91.8956	54.8004	0.745808	8.07183e-05	0.0243599
Zm00001eb254440	32.5256	20.2364	0.684623	0.00344329	0.238858
Zm00001eb170590	9.63715	5.3608	0.846159	0.00968699	0.425793
Zm00001eb068990	0.465319	0.0800733	2.53883	0.0138656	0.493068
Zm00001eb333550	8.78294	4.37416	1.0057	0.00215592	0.180764
Zm00001eb043930	39.0679	28.2259	0.468965	0.038498	0.770205
Zm00001eb086570	32.6847	22.2475	0.554973	0.000622461	0.0870823
Zm00001eb269390	71.6097	52.6512	0.443688	0.0389417	0.772333
Zm00001eb308550	4.47264	2.4945	0.842375	0.047537	0.829523
Zm00001eb394170	28.9645	18.9008	0.615841	0.0353857	0.752179
Zm00001eb115440	0.404872	0.0001	11.9833	0.00181093	0.165912
Zm00001eb013810	64.9805	43.4753	0.579809	0.000962559	0.114208
Zm00001eb123800	62.0706	39.132	0.66556	0.00101636	0.117645
Zm00001eb321410	4.68639	3.37471	0.473715	0.0191431	0.584965
Zm00001eb002030	6.06484	3.7527	0.69254	0.00628776	0.336641
Zm00001eb247130	1.62052	0.620285	1.38545	0.0138147	0.493068
Zm00001eb190430	32.7739	24.059	0.445972	0.00151934	0.149189
Zm00001eb004320	26.02	20.0898	0.373162	0.0119778	0.463369
Zm00001eb135550	154.303	110.664	0.479578	0.0116815	0.460221
Zm00001eb102030	60.0977	43.8754	0.453896	0.0200444	0.595303
Zm00001eb075300	29.9236	23.5503	0.345538	0.0120686	0.463369
Zm00001eb038280	12.7433	8.05506	0.661772	0.00921546	0.413564
Zm00001eb342070	281.462	194	0.536888	0.00198035	0.172221
Zm00001eb009940	9.49258	2.94998	1.6861	0.00012047	0.0307647
Zm00001eb123380	38.64	23.9895	0.687692	0.00433075	0.273773
Zm00001eb393680	8.16931	4.81492	0.762702	0.00858677	0.40043
Zm00001eb058300	4.63579	3.15872	0.553473	0.0193329	0.586726
Zm00001eb285730	21.1739	14.909	0.5061	0.0170796	0.546294
Zm00001eb074200	9.6377	6.89564	0.483006	0.0419241	0.797276
Zm00001eb363620	5.2322	2.61196	1.00229	0.0256257	0.663361
Zm00001eb367750	0.187566	0.0001	10.8732	0.0467181	0.82734
Zm00001eb256260	12.0971	8.85374	0.4503	0.0260594	0.668139
Zm00001eb145750	40.3772	24.9639	0.693696	0.0231727	0.632746
Zm00001eb031190	25.2645	18.8173	0.425051	0.0203713	0.598884
Zm00001eb427870	15.2411	9.91304	0.620564	0.0166427	0.541672
Zm00001eb234470	0.555877	0.0668513	3.05574	0.00120438	0.129954
Zm00001eb374550	0.671919	0.0001	12.7141	3.47034e-07	0.000398804
Zm00001eb412930	16.7469	12.0764	0.471694	0.0368217	0.761699
Zm00001eb009360	13.0475	9.12782	0.51543	0.0475858	0.829523
Zm00001eb255170	6.72856	4.78683	0.491227	0.0331017	0.736084
Zm00001eb027970	132.102	109.839	0.266267	0.0375093	0.769602
Zm00001eb155340	81.552	52.0386	0.648137	0.00175168	0.164083
Zm00001eb258100	36.4274	24.9674	0.544978	0.0101925	0.434967
Zm00001eb433630	9.80408	5.6398	0.797737	0.0127196	0.47353
Zm00001eb244990	9.75134	6.13707	0.66805	0.00685354	0.351717
Zm00001eb066580	27.3499	20.3153	0.428968	0.0091856	0.413383
Zm00001eb375930	1.123	0.105451	3.41272	0.0227336	0.629555
Zm00001eb224430	24.8986	16.1165	0.627523	0.0468952	0.82734
Zm00001eb225330	0.408412	0.18648	1.131	0.0458182	0.819507
Zm00001eb330760	35.3843	27.4872	0.364349	0.00512802	0.300008
Zm00001eb075380	32.1561	20.0041	0.684799	0.0268936	0.677882
Zm00001eb084910	3.49408	1.8807	0.893644	0.0384615	0.770205
Zm00001eb378380	5.48395	3.89069	0.495189	0.0142594	0.5009
Zm00001eb372570	52.4747	42.3936	0.307776	0.0203507	0.598884
Zm00001eb408970	0.298841	0.046453	2.68553	0.0339949	0.745966
Zm00001eb285210	272.87	107.983	1.33741	0.000314148	0.0575648
Zm00001eb402890	23.0065	16.1547	0.510086	0.032184	0.730136
Zm00001eb249500	758.055	579.079	0.388542	0.0228979	0.631892
Zm00001eb287230	113.709	94.7396	0.263305	0.0435508	0.810582
Zm00001eb165470	3.87383	1.65946	1.22305	0.00117507	0.12817
Zm00001eb371020	21.4866	14.9108	0.52708	0.0281834	0.696495
Zm00001eb374700	10.1875	6.60929	0.624234	0.00917132	0.413383
Zm00001eb198510	0.181491	0.0001	10.8257	0.0432741	0.807674
Zm00001eb387280	0.640664	0.259999	1.30106	0.0217182	0.614514
Zm00001eb229190	44.9032	7.58777	2.56507	0.00563568	0.317027
Zm00001eb290630	2.53754	1.14615	1.14663	0.0376452	0.769602
Zm00001eb070940	101.745	77.3944	0.394659	0.0454016	0.816138
Zm00001eb281820	1.76689	0.640033	1.465	0.0351265	0.749513
Zm00001eb107490	190.53	150.718	0.338165	0.0133797	0.485363
Zm00001eb199480	18.2363	11.0413	0.723903	0.0275002	0.688082
Zm00001eb365640	38.6317	30.5055	0.340716	0.0324447	0.730136
Zm00001eb295020	7.94577	4.62016	0.782244	0.00838601	0.397887
Zm00001eb112960	9.21753	4.89295	0.913676	0.00634363	0.338646
Zm00001eb008830	67.5499	42.7831	0.658912	0.00212126	0.180094
Zm00001eb216590	17.1196	11.0868	0.6268	0.00295313	0.216947
Zm00001eb125870	6.95835	4.37301	0.670117	0.0100236	0.430985
Zm00001eb171000	11.8245	9.38229	0.333772	0.0425089	0.80139
Zm00001eb364880	0.206407	0.0001	11.0113	0.0118897	0.462605
Zm00001eb252990	83.4995	59.1099	0.498368	0.0225347	0.627792
Zm00001eb089360	4.28806	2.02529	1.0822	0.0464821	0.826263
Zm00001eb041140	151.296	113.734	0.411715	0.032038	0.730136
Zm00001eb343640	11.8706	7.08779	0.74399	0.00509826	0.300008
Zm00001eb141110	0.429686	0.0001	12.0691	0.0152106	0.518466
Zm00001eb391410	8.94023	5.72835	0.642193	0.0447391	0.813441
Zm00001eb306350	84.3898	48.6732	0.793941	0.0151761	0.518466
Zm00001eb392870	6.59324	2.35427	1.48571	0.00037361	0.0636067
Zm00001eb058000	2.37627	0.954189	1.31635	1.9989e-05	0.00905896
Zm00001eb034140	0.543484	0.0001	12.408	0.015779	0.52668
Zm00001eb237020	18.1724	15.0754	0.269545	0.0379982	0.77019
Zm00001eb380400	1.13062	0.435644	1.37589	0.00503193	0.297633
Zm00001eb330360	6.86056	4.00071	0.77807	0.0403348	0.785414
Zm00001eb239540	4.87397	3.04667	0.677863	0.024036	0.643969
Zm00001eb427600	33.64	19.9399	0.754517	0.00766507	0.375402
Zm00001eb064980	7.70259	0.0001	16.2331	1.47119e-19	4.73386e-15
Zm00001eb360290	37.67	27.8926	0.433534	0.0450872	0.814125
Zm00001eb052150	28.8764	16.4517	0.811652	0.00182052	0.165912
Zm00001eb161110	96.0911	73.6958	0.382819	0.0389147	0.772333
Zm00001eb243350	23.4604	19.8129	0.243785	0.0435767	0.810582
Zm00001eb205370	3.58286	1.92387	0.897103	0.0281358	0.695923
Zm00001eb111690	19.8939	15.4747	0.362413	0.0134879	0.48761
Zm00001eb123070	32.8137	22.2638	0.559594	0.0108693	0.445292
Zm00001eb279470	82.0047	63.2107	0.375537	0.0141101	0.499473
Zm00001eb042410	71.0538	51.5483	0.462988	0.039174	0.772333
Zm00001eb235360	13.8999	9.8099	0.502769	0.00724665	0.36476
Zm00001eb102000	4.20574	1.96885	1.09501	0.00289666	0.215006
Zm00001eb325120	27.6672	20.6746	0.420318	0.0107524	0.441864
Zm00001eb391490	4.016	2.92003	0.459774	0.0442932	0.813441
Zm00001eb107370	35.3146	28.3422	0.317316	0.0135616	0.488112
Zm00001eb315280	0.218314	0.0001	11.0922	0.0115045	0.454767
Zm00001eb188550	94.0394	72.8714	0.367913	0.00635678	0.338646
Zm00001eb260750	0.338721	0.0001	11.7259	5.94604e-05	0.0193258
Zm00001eb008440	63.8968	52.3729	0.286923	0.0324938	0.730136
Zm00001eb017950	9.86636	5.64212	0.806281	0.0144218	0.503855
Zm00001eb058780	1.06826	0.0001	13.383	9.32501e-07	0.000807882
Zm00001eb011380	87.3597	70.612	0.307054	0.0457293	0.818961
Zm00001eb173400	0.968595	0.24378	1.99032	0.0261637	0.66959
Zm00001eb063780	0.827973	0.368195	1.16912	0.0303432	0.712666
Zm00001eb365220	9.71903	6.58055	0.562603	0.0417194	0.795263
Zm00001eb229650	38.6349	25.4086	0.604585	0.0011403	0.12686
Zm00001eb049850	22.5785	15.9372	0.50255	0.0193649	0.586726
Zm00001eb014690	1.60792	0.370007	2.11957	0.0390797	0.772333
Zm00001eb400380	57.9223	49.0959	0.238517	0.0195803	0.589921
Zm00001eb328790	64.5474	43.398	0.572732	0.030938	0.720326
Zm00001eb129910	398.987	287.771	0.471419	0.000742104	0.0958984
Zm00001eb371530	0.777908	0.263367	1.56252	0.0251794	0.659194
Zm00001eb120080	4.71966	2.80719	0.749553	0.0141712	0.499985
Zm00001eb287860	21.181	16.2439	0.382872	0.0343834	0.74735
Zm00001eb141880	62.0495	47.2575	0.392875	0.00345182	0.238858
Zm00001eb421880	9.80253	6.86308	0.514298	0.0204172	0.598884
Zm00001eb341570	0.776911	0.297926	1.38279	0.00147023	0.146464
Zm00001eb120200	38.4046	27.1188	0.501982	0.00431009	0.273004
Zm00001eb183370	84.4495	69.6148	0.278694	0.0287918	0.701955
Zm00001eb428680	60.9703	44.9117	0.441015	0.0185497	0.574531
Zm00001eb065210	8.38003	1.38107	2.60117	1.02518e-05	0.00540774
Zm00001eb189300	372.208	257.107	0.533739	0.0357032	0.756301
Zm00001eb393650	6.01046	3.44073	0.804761	0.0396234	0.777416
Zm00001eb195610	0.908023	0.233123	1.96164	0.0456251	0.818327
Zm00001eb025190	21.7639	17.2974	0.331385	0.0131216	0.483081
Zm00001eb031250	15.5406	11.0402	0.493284	0.0187054	0.576516
Zm00001eb051610	23.5132	11.0179	1.09362	4.46074e-12	2.05048e-08
Zm00001eb200850	0.607573	0.16504	1.88024	0.0402438	0.784593
Zm00001eb139350	3.85958	2.44928	0.656084	0.00407394	0.263227
Zm00001eb288150	50.9106	37.4875	0.441555	0.000404108	0.066682
Zm00001eb159020	88.9195	14.1172	2.65505	0.00459746	0.281776
Zm00001eb378570	31.4887	24.7841	0.34542	0.0202685	0.598328
Zm00001eb398670	4.90922	3.30427	0.571161	0.0300862	0.710126
Zm00001eb115940	0.238676	0.080545	1.56719	0.0207503	0.601265
Zm00001eb414860	11.7085	7.96751	0.555361	0.0268702	0.677882
Zm00001eb397270	33.2222	25.5971	0.376167	0.0370835	0.763427
Zm00001eb367900	17.9403	13.4574	0.414809	0.0177706	0.560045
Zm00001eb195790	5.05191	2.79858	0.852135	0.0211754	0.606102
Zm00001eb298240	45.0789	28.6701	0.652902	0.00209769	0.179411
Zm00001eb249860	4.77829	2.22224	1.10448	0.0180774	0.564735
Zm00001eb363590	11.0806	8.20785	0.432958	0.0280208	0.694092
Zm00001eb433660	13.1784	9.95301	0.404973	0.034033	0.745966
Zm00001eb256000	8.72105	2.73276	1.67414	0.00339475	0.236947
Zm00001eb248870	5.01996	3.47837	0.529264	0.0120965	0.463369
Zm00001eb348500	18.5109	11.1511	0.731195	0.0010698	0.122067
Zm00001eb280930	17.2855	8.7452	0.982999	0.000300647	0.0565726
Zm00001eb350120	34.6857	29.1441	0.251137	0.0387854	0.772277
Zm00001eb196940	35.8663	22.384	0.680157	0.00589189	0.321332
Zm00001eb017850	30.4231	24.4428	0.315758	0.0344884	0.74735
Zm00001eb274920	8.55393	4.47376	0.935099	0.0407135	0.786551
Zm00001eb125070	14.2846	6.70494	1.09116	0.0211135	0.606102
Zm00001eb279750	5.59932	2.36263	1.24486	0.00902402	0.411867
Zm00001eb264680	40.3876	27.0336	0.57916	0.016932	0.543516
Zm00001eb022790	0.395166	0.0001	11.9482	0.00829973	0.395797
Zm00001eb305190	4.89792	2.59366	0.917181	0.0166379	0.541672
Zm00001eb117270	12.5161	7.42257	0.753796	0.00129284	0.135177
Zm00001eb352710	59.164	40.8362	0.534871	0.0380937	0.77019
Zm00001eb150170	9.44765	6.91816	0.449569	0.0136475	0.490105
Zm00001eb403370	0.49922	0.0001	12.2855	0.0264606	0.672529
Zm00001eb157310	527.661	403.123	0.388394	0.00210206	0.179411
Zm00001eb095350	231.455	194.246	0.252851	0.0278869	0.691839
Zm00001eb249770	24.9364	12.1087	1.04221	0.00819627	0.393042
Zm00001eb247760	769.162	563.898	0.447852	0.00366399	0.247098
Zm00001eb347580	0.63727	0.0001	12.6377	1.32449e-05	0.00636089
Zm00001eb025770	1.33466	0.701283	0.928407	0.043504	0.810554
Zm00001eb015000	19.7155	14.2898	0.464348	0.0466261	0.827046
Zm00001eb300820	1.02395	0.0001	13.3219	0.0127297	0.47353
Zm00001eb160470	45.3552	30.5409	0.570522	0.037969	0.77019
Zm00001eb093750	34.2184	27.5828	0.311003	0.00457496	0.280932
Zm00001eb120980	60.3232	44.6055	0.435492	0.0386335	0.770205
Zm00001eb167120	3.01926	1.90726	0.662694	0.0420949	0.799108
Zm00001eb200170	9.52601	6.70252	0.507169	0.0175468	0.555713
Zm00001eb015780	0.282701	0.0001	11.4651	0.0457801	0.819281
Zm00001eb029720	3.01518	2.06922	0.543156	0.023616	0.636489
Zm00001eb043610	64.1157	46.9331	0.450073	0.0122187	0.465003
Zm00001eb084670	13.968	10.3662	0.430235	0.00167434	0.160821
Zm00001eb302970	0.301005	0.0001	11.5556	0.0166725	0.541672
Zm00001eb298230	14.028	10.0859	0.475973	0.0294091	0.708198
Zm00001eb198900	19.1507	13.5971	0.494096	0.033704	0.743314
Zm00001eb193100	56.5582	43.1501	0.390372	0.00383498	0.25139
Zm00001eb398890	5.47056	4.05071	0.433514	0.0381713	0.77019
Zm00001eb384750	107.002	81.54	0.392056	0.0385981	0.770205
Zm00001eb221910	27.5602	19.4805	0.500559	0.0344501	0.74735
Zm00001eb103040	0.413611	0.122312	1.75771	0.0335389	0.741706
Zm00001eb176760	21.5095	16.9338	0.345071	0.0423614	0.80139
Zm00001eb100850	87.6854	68.0003	0.366795	0.0106985	0.440661
Zm00001eb376570	442.51	309.68	0.514931	0.000175909	0.0398607
Zm00001eb398500	6.00147	2.31483	1.37441	0.00569686	0.318817
Zm00001eb391620	30.5484	21.7562	0.489668	0.0403541	0.785414
Zm00001eb057230	278.338	202.421	0.459482	0.00265354	0.204755
Zm00001eb067040	1.92832	1.20233	0.681506	0.0443813	0.813441
Zm00001eb195950	2.03441	1.16108	0.809138	0.0078996	0.381648
Zm00001eb082870	5.52882	2.98283	0.890292	0.0188391	0.579529
Zm00001eb078850	30.8983	22.6857	0.445743	0.00908123	0.413383
Zm00001eb077180	48.6351	35.9094	0.437637	0.00529528	0.30645
Zm00001eb321880	15.0344	9.76298	0.622873	0.00163749	0.158226
Zm00001eb017070	3.89231	2.17151	0.841931	0.00289493	0.215006
Zm00001eb127370	5.37853	1.04799	2.35959	0.000876102	0.109265
Zm00001eb040580	7.4731	4.96303	0.590486	0.0300315	0.710126
Zm00001eb330530	476.718	311.361	0.614545	0.00180981	0.165912
Zm00001eb121190	26.8689	15.1001	0.831379	0.000182137	0.0409833
Zm00001eb231280	11.0204	6.3651	0.791921	0.0380329	0.77019
Zm00001eb288670	101.701	69.2161	0.555151	3.58973e-05	0.013589
Zm00001eb316070	11.361	6.86159	0.72747	0.00480925	0.290794
Zm00001eb418850	111.861	79.7476	0.48819	0.000749409	0.0964549
Zm00001eb274070	0.87238	0.295239	1.56307	0.0185844	0.574531
Zm00001eb041550	10.5539	6.78537	0.637283	0.0324335	0.730136
Zm00001eb251700	163.914	133.693	0.294023	0.0397499	0.778
Zm00001eb147140	4.62531	2.5557	0.855831	0.0227937	0.629555
Zm00001eb402620	3.21942	2.0504	0.650895	0.0415294	0.794388
Zm00001eb104160	0.517869	0.091812	2.49583	0.0401171	0.783756
Zm00001eb097480	3.31172	2.21481	0.580395	0.0300438	0.710126
Zm00001eb338510	261.323	190.831	0.453538	0.0105053	0.437294
Zm00001eb318360	37.0382	28.5179	0.377148	0.0289809	0.703058
Zm00001eb279420	7.19593	4.10064	0.811331	0.00853192	0.399403
Zm00001eb326790	7.36596	4.20251	0.809623	0.0311355	0.722189
Zm00001eb371270	1.8586	1.05863	0.812019	0.0374427	0.769602
Zm00001eb421140	20.9846	15.6094	0.42691	0.0167115	0.541672
Zm00001eb174680	14.7156	1.9551	2.91203	3.79631e-10	1.35726e-06
Zm00001eb238800	170.602	116.251	0.553389	0.0262978	0.670404
Zm00001eb269200	2.76044	1.55336	0.829509	0.0499907	0.848841
Zm00001eb350690	184.889	129.466	0.51408	0.0361604	0.757684
Zm00001eb325230	452.465	337.784	0.421707	0.00416444	0.26711
Zm00001eb008580	3.74062	2.67276	0.484945	0.0362708	0.758205
Zm00001eb007580	2.48171	1.21124	1.03486	0.0363582	0.758688
Zm00001eb198030	17.6079	9.92778	0.826682	0.00986904	0.429711
Zm00001eb272570	0.355429	0.060013	2.56622	0.0292902	0.707029
Zm00001eb244050	3.42609	1.93559	0.823788	0.00774179	0.377728
Zm00001eb364170	4.24689	2.9539	0.523787	0.0449818	0.813441
Zm00001eb355120	114.029	93.368	0.288404	0.0287964	0.701955
Zm00001eb145890	29.0576	22.7572	0.352594	0.0244171	0.646909
Zm00001eb116990	155.502	129.596	0.262914	0.0101722	0.434967
Zm00001eb003700	49.5876	34.6566	0.51685	0.00050108	0.0765507
Zm00001eb303250	0.17787	0.0001	10.7966	8.52502e-05	0.0247126
Zm00001eb293600	5.49985	3.32072	0.727894	0.0324838	0.730136
Zm00001eb128330	792.294	527.779	0.586104	0.00116808	0.127841
Zm00001eb093090	2.93287	1.48412	0.982703	0.0466245	0.827046
Zm00001eb137280	22.1878	10.1351	1.13041	0.0129192	0.478918
Zm00001eb080770	1.81434	0.926934	0.968909	0.0327005	0.732733
Zm00001eb408560	30.3289	22.1296	0.454717	0.0362879	0.758205
Zm00001eb186560	115.762	86.0267	0.428303	0.020266	0.598328
Zm00001eb024910	4.86793	3.08261	0.659154	0.027703	0.689169
Zm00001eb313390	20.0414	7.69285	1.38139	0.0038433	0.25139
Zm00001eb028680	25.5503	17.1577	0.574482	0.0133639	0.485363
Zm00001eb240900	55.8665	45.4552	0.297538	0.0397413	0.778
Zm00001eb130570	74.9977	53.9147	0.476169	0.00511953	0.300008
Zm00001eb232960	26.7421	21.1984	0.335154	0.0452962	0.815861
Zm00001eb389420	146.001	117.312	0.315631	0.0132546	0.483907
Zm00001eb417280	14.3057	8.51233	0.748963	0.0312614	0.722877
Zm00001eb229780	22.0211	12.8324	0.779102	0.019308	0.586726
Zm00001eb168170	14.6096	9.22115	0.663903	0.0157751	0.52668
Zm00001eb111160	6.4872	3.52703	0.879144	0.00118628	0.128956
Zm00001eb352760	85.5942	55.5084	0.624806	0.0146702	0.508685
Zm00001eb334360	4.76663	3.41087	0.482829	0.0186789	0.576251
Zm00001eb158960	1.51673	0.777946	0.963223	0.02342	0.634865
Zm00001eb147080	11.7722	9.10308	0.37096	0.0206297	0.600726
Zm00001eb243270	41.3047	22.8929	0.851405	0.00311012	0.223744
Zm00001eb038380	0.548659	0.191238	1.52054	0.0430295	0.805407
Zm00001eb234850	0.987978	0.465873	1.08454	0.036476	0.75967
Zm00001eb390140	0.397893	0.0001	11.9582	0.0389867	0.772333
Zm00001eb396360	1.6109	0.851177	0.920335	0.0300486	0.710126
Zm00001eb156690	99.8523	80.4634	0.311463	0.00897532	0.410809
Zm00001eb260220	1.06997	0.419693	1.35016	0.00585756	0.321088
Zm00001eb112700	5.0261	3.40985	0.559732	0.0474328	0.828688
Zm00001eb315650	174.619	120.355	0.536917	0.00936528	0.418537
Zm00001eb406990	11.5676	7.28017	0.66805	0.0012012	0.129954
Zm00001eb399370	55.3108	45.2108	0.290896	0.0315535	0.723662
Zm00001eb209750	58.8954	43.114	0.449999	0.0241252	0.645021
Zm00001eb369810	0.442745	0.0268573	4.04309	0.0356443	0.755551
Zm00001eb314000	0.768422	0.321288	1.25803	0.0254357	0.660036
Zm00001eb225390	13.3852	9.78002	0.452733	0.0265179	0.672924
Zm00001eb357760	19.443	15.7445	0.3044	0.0198968	0.593344
Zm00001eb374220	4.4456	1.12873	1.97767	0.00570527	0.318817
Zm00001eb032670	7.32325	4.76544	0.619876	0.0132794	0.483907
Zm00001eb383330	46.678	37.3886	0.320147	0.0416119	0.794626
Zm00001eb213970	27.1546	20.8226	0.383044	0.0217704	0.61502
Zm00001eb023840	69.9116	53.4553	0.3872	0.0478699	0.8317
Zm00001eb190130	15.1879	11.8984	0.352149	0.0378838	0.77019
Zm00001eb167670	30.873	16.0481	0.943944	0.00173627	0.163836
Zm00001eb165490	26.4658	18.9102	0.484965	0.0292662	0.70698
Zm00001eb097880	136.503	89.2389	0.613189	0.0104045	0.436487
Zm00001eb285430	77.7566	58.747	0.404449	0.0294789	0.708926
Zm00001eb088730	0.195619	0.00848467	4.52704	0.0348033	0.748081
Zm00001eb391670	70.4282	43.992	0.678912	0.00137711	0.140195
Zm00001eb374880	115.094	77.3886	0.572621	0.0208751	0.60296
Zm00001eb319710	217.737	173.571	0.327062	0.024684	0.652101
Zm00001eb415630	192.642	150.518	0.355988	0.0151934	0.518466
Zm00001eb013820	3.26107	0.808929	2.01126	0.0117052	0.460221
Zm00001eb299970	45.5835	36.8785	0.305733	0.0161597	0.534138
Zm00001eb209660	33.2517	23.8386	0.480128	0.037392	0.769286
Zm00001eb401930	0.346132	0.0001	11.7571	0.000955587	0.113881
Zm00001eb122470	1.01418	0.52064	0.961958	0.0348235	0.748081
Zm00001eb101460	2.05316	0.0117417	7.45006	3.27887e-06	0.00219801
Zm00001eb371830	1.74243	1.11709	0.641363	0.0446989	0.813441
Zm00001eb104120	1.65242	0.68364	1.27327	0.0200935	0.595347
Zm00001eb083530	123.538	92.6576	0.41497	0.0290902	0.704316
Zm00001eb068000	26.2873	19.8411	0.405871	0.0384364	0.770205
Zm00001eb033930	5.82575	3.99483	0.54431	0.0495679	0.845907
Zm00001eb186720	18.4755	10.3398	0.83741	0.0207326	0.601265
Zm00001eb062400	13.6317	8.4385	0.691911	0.00182475	0.165912
Zm00001eb243510	15.6552	10.9331	0.517938	0.0350626	0.749142
Zm00001eb051480	8.59443	6.73507	0.35171	0.0441468	0.813441
Zm00001eb393180	65.3197	53.9716	0.275316	0.0467454	0.82734
Zm00001eb128730	324.911	265.331	0.292252	0.0268822	0.677882
Zm00001eb287540	1.41486	0.651071	1.11977	0.0223507	0.624917
Zm00001eb344570	63.8314	54.1853	0.236363	0.0282261	0.696495
Zm00001eb068120	432.563	348.783	0.310581	0.032572	0.731381
Zm00001eb048730	144.391	107.429	0.4266	0.0436878	0.812098
Zm00001eb085320	54.2974	46.4483	0.225256	0.0329897	0.735604
Zm00001eb010900	31.8878	24.3548	0.388798	0.00200166	0.173073
Zm00001eb298320	171.131	141.111	0.278271	0.0167963	0.542624
Zm00001eb313180	2.2456	1.29514	0.793995	0.0471196	0.82734
Zm00001eb319800	17.2553	8.80129	0.971255	0.000512083	0.077723
Zm00001eb025340	7.4651	4.66719	0.677607	0.0219041	0.616255
Zm00001eb356930	2.70129	1.72721	0.645205	0.0101181	0.433516
Zm00001eb074270	50.2535	37.3544	0.427948	0.0169157	0.543516
Zm00001eb242010	5.49153	3.32326	0.724607	0.0167331	0.541672
Zm00001eb367740	18.9008	13.4014	0.496066	0.0375402	0.769602
Zm00001eb277290	28.6093	16.5327	0.791156	0.0159501	0.530412
Zm00001eb397370	125.578	76.2031	0.720663	1.30139e-05	0.00634468
Zm00001eb041390	195.482	126.218	0.631125	0.0016984	0.161576
Zm00001eb019870	22.3534	17.2956	0.370087	0.0335271	0.741706
Zm00001eb151330	5.45903	4.08666	0.417722	0.0223538	0.624917
Zm00001eb140540	3.70863	2.61457	0.504313	0.0204281	0.598884
Zm00001eb039230	0.602864	0.0001	12.5576	0.0368551	0.761699
Zm00001eb151540	74.7988	53.0055	0.496872	0.0193017	0.586726
Zm00001eb125920	55.3653	44.9199	0.301626	0.0411655	0.792052
Zm00001eb378650	1.70362	0.55289	1.62353	0.00965164	0.425793
Zm00001eb239770	80.0713	57.6365	0.474302	0.0375991	0.769602
Zm00001eb326930	11.3838	9.22714	0.303028	0.0479299	0.831845
Zm00001eb250000	3.62533	2.32476	0.641029	0.034726	0.748081
Zm00001eb216030	10.1146	5.96369	0.762166	0.00673673	0.349175
Zm00001eb007730	85.7773	71.9191	0.25422	0.0496068	0.845907
Zm00001eb214720	73.948	62.4787	0.243146	0.042616	0.801435
Zm00001eb365210	36.7447	28.4998	0.366584	0.034282	0.74735
Zm00001eb032680	6.25529	3.75717	0.735431	0.043581	0.810582
Zm00001eb230850	0.559769	0.0001	12.4506	0.000670903	0.0916141
Zm00001eb056340	0.567536	0.157057	1.85342	0.00649041	0.342962
Zm00001eb119320	66.9161	54.9041	0.28544	0.0416824	0.795029
Zm00001eb109750	46.1463	26.8812	0.779618	0.014213	0.500361
Zm00001eb396450	21.1761	17.1575	0.303598	0.0493338	0.842577
Zm00001eb107500	2.16002	0.870991	1.31031	0.00624596	0.335519
Zm00001eb327040	1.27984	0.344368	1.89394	0.00536265	0.307583
Zm00001eb326390	2.63458	1.36333	0.950433	0.0342907	0.74735
Zm00001eb333300	72.4132	49.8154	0.539661	0.0173271	0.549294
Zm00001eb377350	27.6036	23.3893	0.239005	0.0422668	0.80139
Zm00001eb270300	29.4199	23.6117	0.317292	0.0489567	0.839701
Zm00001eb374190	50.7976	29.1463	0.801446	0.00495215	0.295084
Zm00001eb399900	72.2956	57.1517	0.339111	0.0425512	0.80139
Zm00001eb248440	7.00107	4.71272	0.571016	0.0202368	0.598328
Zm00001eb434590	198.142	156.332	0.341928	0.0296842	0.709624
Zm00001eb033760	2.24912	1.36711	0.718234	0.0385934	0.770205
Zm00001eb427160	0.446576	0.1161	1.94353	0.0299497	0.710126
Zm00001eb388430	59.7034	46.6423	0.356174	0.0349891	0.749065
Zm00001eb079210	8.78808	6.06112	0.535963	0.0286594	0.701272
Zm00001eb355410	0.275893	0.0001	11.4299	0.0229764	0.63239
Zm00001eb260980	4.58347	3.36107	0.447516	0.0145706	0.506851
Zm00001eb414390	225.942	166.875	0.437188	0.00498215	0.296281
Zm00001eb009630	0.60187	0.17334	1.79585	0.0303104	0.712666
Zm00001eb388800	335.392	243.99	0.459025	0.023502	0.635134
Zm00001eb417620	29.7503	20.3781	0.545883	0.0385096	0.770205
Zm00001eb040610	28.8627	20.723	0.477976	0.0248113	0.653852
Zm00001eb235140	0.101619	0.0001	9.98895	0.0432741	0.807674
Zm00001eb295850	178.636	145.458	0.296419	0.0205409	0.599769
Zm00001eb267500	133.128	0.0001	20.3444	5.36507e-13	3.45264e-09
Zm00001eb329370	4.02828	2.51239	0.681103	0.047439	0.828688
Zm00001eb298250	355.743	277.658	0.357526	0.0378182	0.769688
Zm00001eb020620	24.4104	15.6791	0.638649	0.032773	0.733337
Zm00001eb011280	197.833	136.868	0.531495	0.0159548	0.530412
Zm00001eb316470	20.8174	6.35853	1.71102	3.0428e-13	2.44771e-09
Zm00001eb285190	56.3968	42.7513	0.399646	0.0263145	0.670404
Zm00001eb063330	12.7461	8.57037	0.572626	0.0337836	0.744048
Zm00001eb429530	161.751	98.6709	0.713076	0.00755755	0.37304
Zm00001eb020410	15.9415	8.32075	0.938006	0.000553943	0.0810193
Zm00001eb292230	30.1931	23.8129	0.342478	0.00651844	0.343842
Zm00001eb219670	1.49298	0.767189	0.960537	0.00530494	0.306458
Zm00001eb186300	333.377	190.439	0.80783	7.89616e-05	0.0243005
Zm00001eb391400	31.0545	16.622	0.901711	0.00342743	0.238711
Zm00001eb045460	0.189174	0.0001	10.8855	0.0166992	0.541672
Zm00001eb146380	2.28744	0.463817	2.3021	0.0117434	0.460221
Zm00001eb329520	21.0073	14.695	0.51556	0.0103478	0.436025
Zm00001eb088740	2.08605	1.45043	0.524291	0.00758839	0.373351
Zm00001eb274750	1.5399	0.76291	1.01325	0.0295071	0.709074
Zm00001eb354540	40.4547	32.0222	0.337235	0.0426778	0.802128
Zm00001eb366530	69.9012	45.2243	0.62822	0.00170228	0.161576
Zm00001eb163240	2.51281	1.52657	0.719011	0.0122971	0.466609
Zm00001eb129330	106.535	59.2746	0.845839	0.000142264	0.0341615
Zm00001eb284650	0.388764	0.0001	11.9247	0.0396626	0.77771
Zm00001eb251420	0.83151	0.262237	1.66486	0.000458708	0.0726373
Zm00001eb296630	2.27939	0.877352	1.37742	0.0107094	0.440661
Zm00001eb037570	252.678	195.728	0.368446	0.0418629	0.797055
Zm00001eb306790	20.1852	14.8252	0.445242	0.0484947	0.836578
Zm00001eb281680	2.9813	0.124727	4.57909	0.00243473	0.193917
Zm00001eb267020	7.87664	4.7427	0.731874	0.0198349	0.592847
Zm00001eb162020	6.74987	4.45224	0.600327	0.00829561	0.395797
Zm00001eb032110	0.140664	0.0001	10.458	0.0149027	0.512861
Zm00001eb298110	1.1105	0.211356	2.39346	0.0354145	0.752179
Zm00001eb232500	2.27864	1.49512	0.607913	0.0401433	0.783794
Zm00001eb131620	42.0366	35.5227	0.242905	0.0292057	0.70658
Zm00001eb074760	39.8273	33.4208	0.253011	0.0440021	0.813441
Zm00001eb280610	0.724582	0.280428	1.36952	0.00830291	0.395797
Zm00001eb123470	27.4337	15.0661	0.864649	0.00233908	0.188633
Zm00001eb230830	57.8821	41.4768	0.480812	0.0262787	0.670404
Zm00001eb363950	30.6735	25.3521	0.274885	0.0440199	0.813441
Zm00001eb107000	0.476317	0.0001	12.2177	0.0125777	0.471146
Zm00001eb338000	1.70339	0.484087	1.81507	0.00658999	0.344824
Zm00001eb378720	44.407	31.9314	0.475811	0.0480167	0.832903
Zm00001eb347530	90.5949	65.6187	0.465323	0.00610942	0.331291
Zm00001eb013180	87.9803	71.9561	0.290063	0.0300057	0.710126
Zm00001eb049090	1.36868	0.509514	1.42559	0.00552762	0.313138
Zm00001eb105950	1.51959	0.78546	0.95207	0.0304764	0.713266
Zm00001eb172230	110.202	82.2789	0.421557	0.00124775	0.132505
Zm00001eb036720	85.9284	71.1875	0.271511	0.0150632	0.516725
Zm00001eb017940	11.425	6.08149	0.909695	0.00114147	0.12686
Zm00001eb016090	0.084589	0.0001	9.72433	0.0013004	0.135177
Zm00001eb052620	1.47232	0.418328	1.81539	0.0043845	0.275547
Zm00001eb225230	1398.47	925.706	0.595219	0.000565524	0.0823388
Zm00001eb166450	266.866	201.115	0.408094	0.0440983	0.813441
Zm00001eb400840	3.01951	1.07017	1.49647	0.000354881	0.0614153
Zm00001eb253490	0.773979	0.117668	2.71758	0.046651	0.827046
Zm00001eb086840	7.13647	5.0657	0.494451	0.0224436	0.626335
Zm00001eb422140	12.058	6.69761	0.848277	0.0030111	0.219204
Zm00001eb122360	11.1982	8.18435	0.452327	0.0101798	0.434967
Zm00001eb186790	2.21805	0.957397	1.2121	0.00367744	0.247098
Zm00001eb210010	2.59178	1.60352	0.692702	0.0446988	0.813441
Zm00001eb388340	3.92965	2.57091	0.612121	0.00852485	0.399403
Zm00001eb431370	59.1146	36.5449	0.693843	0.00191545	0.169049
Zm00001eb147390	2.89373	1.54434	0.905937	0.010669	0.440124
Zm00001eb265430	126.114	97.5843	0.370007	0.00659063	0.344824
Zm00001eb290420	0.175742	0.0001	10.7792	0.0254263	0.660036
Zm00001eb286230	1.3817	0.801604	0.785481	0.0424458	0.80139
Zm00001eb101150	2.72426	1.51054	0.8508	0.00384385	0.25139
Zm00001eb178780	22.906	16.6543	0.459828	0.0467724	0.82734
Zm00001eb332460	148.394	111	0.418879	0.00220704	0.182092
Zm00001eb179780	34.0698	24.3777	0.482933	0.0298486	0.710126
Zm00001eb041920	0.193116	0.061447	1.65205	0.0484275	0.836578
Zm00001eb357930	2.61413	0.897827	1.54182	0.00760418	0.373557
Zm00001eb107240	2.17021	0.978435	1.14929	0.00367968	0.247098
Zm00001eb106110	24.8645	18.3676	0.436925	0.00545598	0.310566
Zm00001eb283680	2.01004	0.469061	2.09938	0.000279002	0.0547551
Zm00001eb159650	3.07618	1.14305	1.42826	8.89782e-05	0.025563
Zm00001eb144880	3.01433	1.58143	0.930609	0.040439	0.785763
Zm00001eb052540	359.153	271.533	0.403474	0.0211819	0.606102
Zm00001eb374040	9.48446	5.81623	0.705481	0.012082	0.463369
Zm00001eb262710	4.52422	2.15381	1.07078	0.0109921	0.44658
Zm00001eb265900	17.0561	11.3858	0.583054	0.0471804	0.827766
Zm00001eb396300	29.0055	21.7791	0.41338	0.0481971	0.83476
Zm00001eb321710	24.3527	19.5003	0.320585	0.0237042	0.63779
Zm00001eb252000	21.8133	16.0541	0.442262	0.0234426	0.634943
Zm00001eb006270	63.6856	51.1258	0.316914	0.0230928	0.63239
Zm00001eb374230	9.83061	3.65693	1.42665	0.00311518	0.223744
Zm00001eb343680	250.162	198.81	0.331477	0.0491012	0.840409
Zm00001eb238530	3.91162	2.30876	0.760647	0.0262201	0.66959
Zm00001eb192480	29.521	10.963	1.42911	0.0394392	0.774275
Zm00001eb218000	220.074	176.675	0.316887	0.0276396	0.689169
Zm00001eb283110	264.898	226.614	0.225201	0.0194762	0.589543
Zm00001eb335380	57.7814	42.7651	0.434172	0.000428779	0.069681
Zm00001eb389490	0.45674	0.0580473	2.97607	0.0123756	0.467617
Zm00001eb081900	12.6843	9.53857	0.411201	0.00779069	0.378649
Zm00001eb030170	9.83531	5.74919	0.774611	0.00116479	0.127841
Zm00001eb101870	0.170488	0.0001	10.7355	0.0298563	0.710126
Zm00001eb381620	481.127	336.99	0.513711	0.0238055	0.639481
Zm00001eb413690	15.1202	11.4994	0.394916	0.0385948	0.770205
Zm00001eb165180	5.38611	3.26816	0.720764	0.0284297	0.697242
Zm00001eb430780	84.6917	63.8072	0.408501	0.00758592	0.373351
Zm00001eb401950	0.239442	0.0001	11.2255	0.0060841	0.330689
Zm00001eb163910	2.14589	0.901831	1.25065	0.0155888	0.52414
Zm00001eb281590	10.3409	5.74165	0.848828	0.0039697	0.257008
Zm00001eb090630	0.21634	0.0001	11.0791	0.0367569	0.761699
Zm00001eb406830	4.07657	2.01931	1.01349	0.0305785	0.715061
Zm00001eb253970	25.1466	20.0127	0.329448	0.0322166	0.730136
Zm00001eb087740	28.1159	17.3767	0.694234	0.0377397	0.769602
Zm00001eb096900	100.668	68.3717	0.558136	0.0131949	0.483907
Zm00001eb106750	7.20936	4.79415	0.588595	0.014895	0.512861
Zm00001eb366060	1.07294	0.216113	2.31172	0.0176812	0.55832
Zm00001eb212450	1.47182	0.816316	0.850398	0.0364589	0.75967
Zm00001eb417150	59.2714	44.1572	0.424689	0.044786	0.813441
Zm00001eb137380	114.956	63.6367	0.853154	0.00356041	0.244793
Zm00001eb158470	17.2772	11.2051	0.624712	0.00218756	0.182001
Zm00001eb023070	662.009	465.811	0.507105	0.0383659	0.770205
Zm00001eb039300	13.226	10.1238	0.38562	0.0330844	0.736084
Zm00001eb180880	43.1566	31.0312	0.475859	0.00722789	0.36476
Zm00001eb101760	9.73215	6.81476	0.514096	0.0114376	0.454767
Zm00001eb010960	32.468	27.6003	0.234335	0.0366834	0.761034
Zm00001eb224740	30.4571	22.9554	0.407948	0.0227887	0.629555
Zm00001eb013220	41.0371	33.1036	0.309938	0.0179669	0.562906
Zm00001eb328990	59.9739	47.9931	0.321507	0.0358217	0.756855
Zm00001eb413920	2.21742	0.512905	2.11212	0.00888983	0.409225
Zm00001eb123310	7.06621	3.01954	1.22661	0.018624	0.575109
Zm00001eb196680	1.40995	0.150633	3.22654	0.000692521	0.0932354
Zm00001eb276540	1.05213	0.526911	0.99768	0.0127265	0.47353
Zm00001eb417860	0.776984	0.123435	2.65413	0.0172322	0.547796
Zm00001eb200270	77.4604	46.8819	0.724426	0.01244	0.467817
Zm00001eb233760	1.64134	0.565732	1.53668	0.0166468	0.541672
Zm00001eb236730	3.73872	1.90871	0.969951	0.0425579	0.80139
Zm00001eb060390	5.38584	4.26212	0.337599	0.0473987	0.828688
Zm00001eb186950	3.03566	1.78688	0.764566	0.0459156	0.819952
Zm00001eb297100	29.9043	18.9463	0.658439	0.0336267	0.742626
Zm00001eb390200	1.32405	0.603428	1.13371	0.0412732	0.792052
Zm00001eb218160	0.266195	0.0401893	2.7276	0.0106385	0.439562
Zm00001eb125980	72.519	53.663	0.434433	0.0467286	0.82734
Zm00001eb311610	9.62927	7.09033	0.441574	0.0100141	0.430985
Zm00001eb196160	30.3911	20.0247	0.601869	0.0302493	0.71202
Zm00001eb411940	0.0595603	0.0001	9.21821	0.034074	0.746357
Zm00001eb418840	3.89984	2.60031	0.58473	0.0260171	0.667826
Zm00001eb133930	33.9865	27.0939	0.326995	0.00477251	0.289745
Zm00001eb229340	0.2749	0.0439557	2.64478	0.0023794	0.190453
Zm00001eb013610	45.3183	36.1039	0.327941	0.0462134	0.822915
Zm00001eb405180	0.100343	0.0001	9.97072	0.049634	0.845907
Zm00001eb133980	1.13512	0.362367	1.64732	0.0198432	0.592847
Zm00001eb214540	48.1172	30.9308	0.637511	0.0203796	0.598884
Zm00001eb071250	35.0937	25.8023	0.443717	0.0329086	0.734836
Zm00001eb370130	11.0666	8.04001	0.460939	0.00666027	0.346249
Zm00001eb279290	142.202	103.41	0.459557	0.024231	0.645075
Zm00001eb252220	3.36008	2.42885	0.468222	0.0289252	0.702964
Zm00001eb134790	2.65292	1.86552	0.508007	0.041433	0.794038
Zm00001eb304940	67.2482	43.8079	0.618306	0.0279496	0.692862
Zm00001eb297410	1.10559	0.412627	1.42191	0.0230066	0.63239
Zm00001eb324610	5.56176	2.49262	1.15788	0.00971341	0.425815
Zm00001eb156780	45.8909	37.8782	0.276838	0.0233121	0.633007
Zm00001eb174520	51.0099	33.7854	0.594378	0.0349679	0.749065
Zm00001eb153550	3.15476	1.77386	0.830641	0.0390838	0.772333
Zm00001eb312970	8.48341	5.40263	0.650982	0.00454943	0.279899
Zm00001eb074210	1592.54	1196.39	0.412646	0.020055	0.595303
Zm00001eb127890	30.1677	13.6689	1.14211	9.35398e-07	0.000807882
Zm00001eb145720	16.6704	11.2318	0.569702	0.0171869	0.547662
Zm00001eb402800	9.17837	6.79658	0.433428	0.0475986	0.829523
Zm00001eb199060	18.6851	13.8006	0.437159	0.0210704	0.606102
Zm00001eb005850	40.6598	29.1642	0.479406	0.0143397	0.502302
Zm00001eb232490	10.9155	8.16542	0.418783	0.0138411	0.493068
Zm00001eb088950	30.9028	20.1523	0.616795	0.00102008	0.117645
Zm00001eb002440	43.979	31.0981	0.499992	0.00224209	0.184225
Zm00001eb258850	1.0984	0.637706	0.784445	0.00614651	0.332397
Zm00001eb276700	1.8996	0.798013	1.25122	0.0129964	0.48045
Zm00001eb085530	0.123233	0.0124633	3.30562	0.0357767	0.756855
Zm00001eb157040	23.2807	13.642	0.771081	9.54083e-07	0.000807882
Zm00001eb111890	11.3539	7.92858	0.518054	0.0443552	0.813441
Zm00001eb282210	4.99919	2.88172	0.794764	0.0253315	0.660036
Zm00001eb434220	32.694	11.48	1.5099	2.9587e-06	0.00205878
Zm00001eb339340	40.4365	23.3978	0.789284	0.00279293	0.21092
Zm00001eb216370	0.726868	0.285652	1.34743	0.0122775	0.466415
Zm00001eb073660	24.6516	18.5197	0.41262	0.0469261	0.82734
Zm00001eb012120	6.8342	4.75508	0.523304	0.0437834	0.812468
Zm00001eb191120	0.626632	0.0001	12.6134	0.0369759	0.761699
Zm00001eb118300	6.94141	4.63243	0.58346	0.00635639	0.338646
Zm00001eb263140	1.51503	0.657141	1.20508	0.031805	0.72684
Zm00001eb009090	518.454	399.631	0.375547	0.0382964	0.770205
Zm00001eb388330	0.362279	0.132862	1.44718	0.0381407	0.77019
Zm00001eb402470	0.10393	0.000135667	9.58133	0.0365531	0.760291
Zm00001eb380680	39.1452	31.9099	0.294831	0.0258279	0.665821
Zm00001eb223740	0.863355	0.0001	13.0757	3.87566e-06	0.00254504
Zm00001eb292730	3.77732	1.71332	1.14057	0.0412801	0.792052
Zm00001eb169230	20.3004	17.0793	0.249261	0.0253306	0.660036
Zm00001eb229790	64.9699	45.4226	0.516359	0.0091594	0.413383
Zm00001eb041200	102.491	71.1386	0.526798	0.00263633	0.204742
Zm00001eb408320	5.41658	2.8047	0.949536	0.00741477	0.370805
Zm00001eb299170	6.22035	4.47775	0.474222	0.0192074	0.586357
Zm00001eb016840	0.293243	0.0001	11.5179	0.0110449	0.446874
Zm00001eb207770	12.9803	7.33122	0.824194	0.0143747	0.502756
Zm00001eb090230	125.562	82.8215	0.600322	0.0203914	0.598884
Zm00001eb302940	35.3835	28.3957	0.317402	0.0346281	0.747903
Zm00001eb305500	0.217251	0.0208407	3.38189	0.0471304	0.82734
Zm00001eb283380	9.78804	7.58297	0.368257	0.0283053	0.697058
Zm00001eb107480	537.39	415.64	0.370634	0.0195623	0.589921
Zm00001eb199490	180.329	99.5251	0.857503	0.000118247	0.0304854
Zm00001eb052020	12.9434	8.59349	0.590896	0.000334084	0.0588037
Zm00001eb418270	2.6435	1.34531	0.974515	0.0464895	0.826263
Zm00001eb426280	82.8962	58.2145	0.509927	0.0390008	0.772333
Zm00001eb298270	3.63414	2.03059	0.839713	0.009129	0.413383
Zm00001eb057520	0.726104	0.0001	12.826	0.00487018	0.291821
Zm00001eb108550	6.91863	4.18403	0.725593	0.0197059	0.591054
Zm00001eb320500	2.20979	1.09848	1.0084	0.0345138	0.74735
Zm00001eb230750	57.0389	48.5515	0.232428	0.0406129	0.786551
Zm00001eb398770	26.5197	14.4509	0.875907	0.0037682	0.250395
Zm00001eb144520	69.2115	44.5974	0.634052	0.000127938	0.0316665
Zm00001eb026630	75.214	42.3899	0.827279	0.00016597	0.0381459
Zm00001eb199170	4.02612	2.32219	0.793903	0.0443708	0.813441
Zm00001eb379330	9.48047	4.90973	0.949314	0.0159041	0.530307
Zm00001eb213960	25.2658	18.6891	0.434985	0.0417972	0.796274
Zm00001eb219610	0.147622	0.0001	10.5277	0.0169158	0.543516
Zm00001eb208350	3.70832	2.72677	0.443571	0.0311205	0.722189
Zm00001eb055410	64.0034	36.1442	0.824387	0.000205705	0.0447229
Zm00001eb326330	255.93	203.007	0.33422	0.0331478	0.736214
Zm00001eb326590	11.1634	8.40783	0.408966	0.0156096	0.524289
Zm00001eb040190	19.362	15.1903	0.350078	0.0390244	0.772333
Zm00001eb158990	0.221197	0.0001	11.1111	0.0470351	0.82734
Zm00001eb080110	11.9102	8.78872	0.438477	0.048723	0.837479
Zm00001eb291850	525.935	354.99	0.567104	0.00787559	0.381425
Zm00001eb239550	21.325	14.8301	0.52402	9.97578e-05	0.0272026
Zm00001eb264430	0.4007	0.0001	11.9683	0.0369265	0.761699
Zm00001eb236850	202.224	136.961	0.562187	0.047211	0.827852
Zm00001eb019680	15.5241	8.93217	0.797428	0.00377581	0.250395
Zm00001eb375850	68.9743	42.0187	0.71503	0.041529	0.794388
Zm00001eb419520	16.5555	10.7143	0.627772	0.0210627	0.606102
Zm00001eb319090	5.40823	3.93371	0.459263	0.0114631	0.454767
Zm00001eb228490	2.93943	1.62251	0.85731	0.0366132	0.760556
Zm00001eb020560	12.3261	7.04053	0.807966	0.00092093	0.112245
Zm00001eb282950	80.5742	66.6125	0.274525	0.0377818	0.769602
Zm00001eb109910	92.1905	53.8636	0.775307	0.000243868	0.0505784
Zm00001eb051510	25.5298	20.4552	0.319716	0.0480506	0.833041
Zm00001eb289320	35.4535	27.7979	0.350952	0.0168287	0.542954
Zm00001eb175400	5.44679	3.83253	0.50711	0.0347388	0.748081
Zm00001eb043650	70.4492	53.4879	0.397372	0.0148739	0.512861
Zm00001eb151730	0.311352	0.0001	11.6043	0.0254263	0.660036
Zm00001eb169340	66.0903	53.556	0.303391	0.0181764	0.566718
Zm00001eb016270	53.4039	24.7525	1.10937	0.00795638	0.383252
Zm00001eb170950	6.22211	3.75645	0.728034	0.026544	0.673055
Zm00001eb200280	54.9911	32.2673	0.769126	0.0033848	0.236767
Zm00001eb056870	275.987	208.855	0.402103	0.0332829	0.737381
Zm00001eb245720	1.98216	0.843979	1.2318	0.00151519	0.149189
Zm00001eb266650	12.601	7.96756	0.661334	0.0328372	0.733752
Zm00001eb077580	13.1082	8.4629	0.63124	0.0264114	0.671809
Zm00001eb257290	11.6183	5.57862	1.05842	0.00335971	0.235523
Zm00001eb084430	42.2359	34.7736	0.280475	0.0393524	0.773664
Zm00001eb279460	113.675	93.7237	0.278429	0.0193522	0.586726
Zm00001eb434100	1.09474	0.645811	0.761411	0.0445311	0.813441
Zm00001eb301520	86.3346	62.3975	0.468451	0.0155594	0.523841
Zm00001eb298480	136.705	101.74	0.426181	0.00914466	0.413383
Zm00001eb314970	15.7222	11.4645	0.455635	0.0391963	0.772333
Zm00001eb013430	37.0747	24.7442	0.583346	5.84866e-08	7.52769e-05
Zm00001eb165790	42.2852	24.5964	0.781709	0.00438235	0.275547
Zm00001eb389440	43.914	36.1769	0.279613	0.0346077	0.747903
Zm00001eb227370	38.8123	29.7264	0.384771	0.0132584	0.483907
Zm00001eb338180	2.80518	1.17046	1.26102	0.0277364	0.689169
Zm00001eb332470	70.8561	47.808	0.56764	8.10053e-05	0.0243599
Zm00001eb099620	28.8634	18.5866	0.634977	2.30742e-05	0.00976918
Zm00001eb431830	37.4014	25.8316	0.533954	0.0470342	0.82734
Zm00001eb335630	90.3278	73.1735	0.303849	0.0037533	0.250395
Zm00001eb412910	21.2707	15.6999	0.438117	0.00233119	0.188469
Zm00001eb129020	23.2741	14.7577	0.657254	0.00969857	0.425793
Zm00001eb345400	22.8449	14.8408	0.622301	0.0148661	0.512861
Zm00001eb083540	377.108	269.451	0.484956	0.0257151	0.664607
Zm00001eb003580	10.8332	6.57384	0.720652	0.00454715	0.279899
Zm00001eb334500	19.6525	11.8619	0.728372	0.00579276	0.320321
Zm00001eb226140	0.446289	0.152004	1.55387	0.0341917	0.74734
Zm00001eb328780	20.6645	11.4211	0.855451	0.000616496	0.0866244
Zm00001eb252880	30.8561	24.6991	0.321099	0.0296844	0.709624
Zm00001eb399890	44.4964	34.8389	0.352989	0.00388302	0.252923
Zm00001eb341540	8.24141	6.60215	0.319954	0.0384495	0.770205
Zm00001eb236070	14.3365	9.5778	0.581931	0.0242629	0.645075
Zm00001eb302440	0.14066	0.0001	10.458	0.0103425	0.436025
Zm00001eb124210	145.242	104.989	0.468221	0.0134218	0.485798
Zm00001eb195190	7.57337	5.72477	0.403717	0.0244272	0.646909
Zm00001eb154360	2.07895	1.33588	0.638063	0.0268404	0.677882
Zm00001eb206850	5.4487	2.85674	0.931544	0.00743295	0.370806
Zm00001eb136250	36.511	21.2333	0.782005	0.0124453	0.467817
Zm00001eb134090	130.604	93.676	0.479451	0.00378196	0.250395
Zm00001eb370350	20.5737	12.0811	0.76805	0.0269594	0.677882
Zm00001eb130340	6.27041	4.39967	0.511164	0.0432404	0.807674
Zm00001eb089930	7.51095	1.73324	2.11553	0.000676607	0.0918615
Zm00001eb395350	1.48411	0.897509	0.7256	0.039161	0.772333
Zm00001eb140000	211.487	151.237	0.483763	0.0486805	0.837195
Zm00001eb211100	47.7284	34.9364	0.450117	0.0179839	0.562906
Zm00001eb143060	25.1292	19.3789	0.374881	0.0359014	0.757508
Zm00001eb108800	0.666098	0.226991	1.5531	0.00952276	0.422267
Zm00001eb313700	28.9261	20.7066	0.482281	0.0344798	0.74735
Zm00001eb194780	66.0324	40.7184	0.697494	0.0111329	0.446874
Zm00001eb115210	160.577	98.0012	0.712391	0.00298364	0.217698
Zm00001eb320160	0.223086	0.0243737	3.19421	0.0299141	0.710126
Zm00001eb197550	0.602042	0.250098	1.26737	0.0214734	0.612209
Zm00001eb097020	0.846828	0.221094	1.93741	0.0080385	0.386629
Zm00001eb048840	2.16871	0.581199	1.89973	0.0433559	0.808732
Zm00001eb080730	39.4117	23.543	0.743326	0.0103979	0.436487
Zm00001eb278680	10.9589	5.42956	1.0132	0.000803665	0.101014
Zm00001eb379280	13.8012	9.08742	0.602853	0.0018815	0.167704
Zm00001eb345740	100.235	84.9938	0.237955	0.0368025	0.761699
Zm00001eb270100	0.433285	0.0001	12.0811	0.02472	0.652514
Zm00001eb043370	0.333182	0.0001	11.7021	0.00527662	0.306361
Zm00001eb295040	3.55386	2.71275	0.389628	0.0455323	0.817574
Zm00001eb337000	4.11901	0.021803	7.56163	0.00278128	0.21092
Zm00001eb166680	13.247	10.5865	0.323445	0.0320086	0.730136
Zm00001eb130530	6.69735	4.6043	0.540607	0.0297764	0.710126
Zm00001eb381290	27.0313	19.0338	0.506071	0.036042	0.757684
Zm00001eb429540	1085.14	716.33	0.599184	0.0408921	0.788367
Zm00001eb064750	48.6073	31.4246	0.629281	0.00386186	0.252055
Zm00001eb060960	3.61727	2.03251	0.83164	0.0301247	0.710126
Zm00001eb025100	11.4987	6.81569	0.754536	0.0123696	0.467617
Zm00001eb225090	33.6862	24.8212	0.440585	0.0206937	0.601265
Zm00001eb154650	339.028	244.872	0.469381	0.0157597	0.52668
Zm00001eb058740	34.6956	26.4207	0.393083	0.0117184	0.460221
Zm00001eb099070	4.83353	3.55512	0.443178	0.0412323	0.792052
Zm00001eb249760	24.3261	11.8124	1.04221	0.00819627	0.393042
Zm00001eb389670	7.74011	5.69109	0.443649	0.0230864	0.63239
Zm00001eb023400	55.9623	30.2485	0.887593	0.0103528	0.436025
Zm00001eb423900	0.202064	0.00513233	5.29905	0.00152078	0.149189
Zm00001eb408140	29.6908	21.1149	0.491753	0.0179302	0.562868
Zm00001eb292970	0.646495	0.170451	1.92328	0.0138679	0.493068
Zm00001eb009510	13.4197	10.1783	0.398855	0.0408597	0.788214
Zm00001eb338390	1.32783	0.656536	1.01613	0.0216219	0.613518
Zm00001eb323430	58.7646	34.0884	0.785669	0.00910638	0.413383
Zm00001eb401970	0.364221	0.0001	11.8306	0.000879725	0.109293
Zm00001eb372520	2.73632	1.57299	0.798722	0.0468859	0.82734
Zm00001eb109960	30.4987	15.6708	0.96067	0.000251938	0.0516344
Zm00001eb151560	15.56	7.22613	1.10654	0.0223347	0.624917
Zm00001eb194530	26.299	16.2761	0.69225	0.00698779	0.356941
Zm00001eb280950	208.326	145.442	0.518395	0.00722562	0.36476
Zm00001eb057400	56.9479	44.6269	0.351729	0.00259492	0.202395
Zm00001eb386660	0.32689	0.045534	2.84379	0.0437502	0.812468
Zm00001eb255370	27.34	20.9946	0.380993	0.0470123	0.82734
Zm00001eb373190	57.5274	41.715	0.463681	0.0105899	0.439562
Zm00001eb039650	196.851	121.867	0.691794	0.0119247	0.463369
Zm00001eb244440	10.625	6.2121	0.774307	0.0324286	0.730136
Zm00001eb011560	23.616	15.6433	0.594225	0.021584	0.612981
Zm00001eb117770	0.969351	0.165063	2.554	0.00749669	0.372255
Zm00001eb392340	88.7054	32.3069	1.45718	1.99691e-09	4.9378e-06
Zm00001eb068420	28.5263	18.5742	0.618993	0.00220028	0.182001
Zm00001eb264630	79.2067	50.8205	0.640211	0.0179531	0.562906
Zm00001eb279450	121.45	98.6488	0.299992	0.00920304	0.413564
Zm00001eb260000	6.50526	4.48732	0.535752	0.0324487	0.730136
Zm00001eb344530	4.81414	1.72495	1.48072	0.00175296	0.164083
Zm00001eb039850	0.614525	0.225415	1.44689	0.0322342	0.730136
Zm00001eb390690	5.90167	3.72314	0.664602	0.041654	0.79496
Zm00001eb101370	3.44706	2.19385	0.651904	0.0381779	0.77019
Zm00001eb027860	61.373	49.6781	0.304994	0.0342118	0.74734
Zm00001eb000450	115.523	53.717	1.10473	0.000614847	0.0866244
Zm00001eb402330	8.22871	6.05317	0.442976	0.0161684	0.534138
Zm00001eb179710	6.81586	4.58725	0.571267	0.0323719	0.730136
Zm00001eb158630	293.961	231.696	0.343392	0.0365951	0.760556
Zm00001eb035340	7.95089	5.82013	0.450065	0.0233115	0.633007
Zm00001eb176770	10.6005	9.10719	0.21905	0.0484749	0.836578
Zm00001eb033420	4.43059	1.27934	1.7921	0.00524424	0.305143
Zm00001eb004740	14.962	10.4336	0.520067	0.00973307	0.426097
Zm00001eb032770	0.258593	0.0001	11.3365	0.00228613	0.18623
Zm00001eb013600	3.25184	2.24498	0.534553	0.0104584	0.43704
Zm00001eb351050	6.91314	3.64068	0.925132	0.000737593	0.0956997
Zm00001eb067420	2.01378	0.796609	1.33796	0.0154534	0.522887
Zm00001eb110620	4.22014	2.53676	0.734305	0.0231365	0.632746
Zm00001eb020970	88.2536	65.558	0.428883	0.0242332	0.645075
Zm00001eb082130	3.8089	2.23583	0.768563	0.00880618	0.405955
Zm00001eb048540	5.5212	3.84831	0.520757	0.0189988	0.582214
Zm00001eb059630	43.1207	31.3722	0.458895	0.0211282	0.606102
Zm00001eb252470	1.61285	0.5984	1.43043	0.0160095	0.531618
Zm00001eb197370	13.186	9.41085	0.486615	0.0294266	0.708198
Zm00001eb017930	479.239	310.832	0.624609	0.00130233	0.135177
Zm00001eb050610	23.2408	17.268	0.428557	0.00575122	0.320321
Zm00001eb324900	48.0083	34.3781	0.481795	0.0330375	0.735674
Zm00001eb342680	3.70127	2.22212	0.736084	0.0230472	0.63239
Zm00001eb351560	0.207521	0.0001	11.019	0.0298497	0.710126
Zm00001eb382500	18.6899	10.4332	0.841073	0.0130563	0.481227
Zm00001eb168040	2.51538	1.3643	0.88261	0.0465041	0.826263
Zm00001eb403570	0.686573	0.190777	1.84753	0.006581	0.344824
Zm00001eb238730	28.9672	14.6646	0.982081	0.00138117	0.140195
Zm00001eb074680	46.2187	28.4681	0.69913	0.000864645	0.108256
Zm00001eb096430	11.4584	1.21544	3.23686	0.00216621	0.181044
Zm00001eb250900	17.6356	9.14182	0.947934	0.000939324	0.113201
Zm00001eb415640	9.06337	6.34298	0.514887	0.0208009	0.601899
Zm00001eb393070	199.812	155.159	0.364896	0.0447173	0.813441
Zm00001eb333150	2.1363	1.14387	0.901189	0.0102301	0.435792
Zm00001eb234070	11.1242	7.22212	0.623206	0.00344943	0.238858
Zm00001eb429240	0.776496	0.169676	2.19419	0.000203082	0.044663
Zm00001eb163600	2.65809	1.89478	0.488357	0.0361904	0.757684
Zm00001eb372230	50.7776	27.5872	0.880194	0.00135801	0.139162
Zm00001eb198020	69.8548	46.4025	0.590158	0.0204988	0.599628
Zm00001eb422410	87.228	50.7688	0.78085	4.80871e-05	0.0163234
Zm00001eb213120	3.6933	2.64943	0.479231	0.0338209	0.744361
Zm00001eb053580	15.5369	9.03909	0.781449	0.0135325	0.48761
Zm00001eb306030	263.229	212.507	0.30881	0.00335045	0.235387
Zm00001eb151650	65.2888	51.5905	0.33973	0.0331571	0.736214
Zm00001eb266470	9.86325	6.75138	0.546882	0.0304465	0.713266
Zm00001eb039270	16.381	12.4187	0.39951	0.0343387	0.74735
Zm00001eb311500	2.60177	0.910161	1.5153	0.00452577	0.279512
Zm00001eb014090	18.345	12.6703	0.533936	0.0499621	0.848841
Zm00001eb398410	2.70991	1.26976	1.09369	0.000988551	0.115668
Zm00001eb291420	9.42516	5.68223	0.730059	0.00557424	0.31412
Zm00001eb048870	3.65915	1.73011	1.08064	0.000142017	0.0341615
Zm00001eb055610	0.210585	0.0001	11.0402	0.0260265	0.667826
Zm00001eb102480	9.06618	5.42213	0.741634	0.0307801	0.71769
Zm00001eb074600	23.4241	16.7095	0.48733	0.0022717	0.185524
Zm00001eb412150	7.46084	3.41823	1.12609	0.0290763	0.704316
Zm00001eb298740	0.696256	0.191615	1.86141	0.0261426	0.66959
Zm00001eb126350	4.63615	2.78852	0.733428	0.0324041	0.730136
Zm00001eb208980	26.5135	16.3539	0.697093	3.78689e-05	0.0141687
Zm00001eb015430	7.34594	4.69793	0.644922	0.0238498	0.640046
Zm00001eb316940	127	89.9491	0.497643	0.01353	0.48761
Zm00001eb084940	17.6232	13.8177	0.350953	0.0196286	0.590405
Zm00001eb048110	26.2009	5.22287	2.3267	0.0102578	0.436018
Zm00001eb144540	2.43321	1.58747	0.616132	0.0412439	0.792052
Zm00001eb127410	2.13495	1.15237	0.889598	0.0407245	0.786551
Zm00001eb060130	239.553	185.795	0.366639	0.00191233	0.169049
