# Supplementary material for: Genome-wide transcriptome and gene family analysis reveal candidate genes associated with potassium uptake of maize colonized by arbuscular mycorrhizal fungi
Source: BMC Plant Biol. 2024 Sep 6;24:838. doi: 10.1186/s12870-024-05398-6 (PMC11378567; doi:10.1186/s12870-024-05398-6)
Supplement: Supplementary file 4 — Supplementary Material 4. [file 12870_2024_5398_MOESM4_ESM.xlsx]

## Sheet: Sheet1
Table S3 Members of each gene family
Gene family name	Gene ID	Name in figure 6
ARF	Zm00001eb035640
	Zm00001eb408800
	Zm00001eb232120
	Zm00001eb363810
	Zm00001eb292830
	Zm00001eb031700
	Zm00001eb045640
	Zm00001eb029770
	Zm00001eb227100
	Zm00001eb185290
	Zm00001eb433460	ZmARF1
	Zm00001eb243930
	Zm00001eb142540
	Zm00001eb373970
	Zm00001eb224680
	Zm00001eb066640	ZmARF2
	Zm00001eb152940	ZmARF3
	Zm00001eb225570
	Zm00001eb207450
	Zm00001eb136130
	Zm00001eb273540
	Zm00001eb133000
	Zm00001eb077170
	Zm00001eb067270
	Zm00001eb076420
	Zm00001eb221620
	Zm00001eb370810	ZmARF4
	Zm00001eb082150
	Zm00001eb434380	ZmARF5
	Zm00001eb295830
	Zm00001eb247720
	Zm00001eb182260
	Zm00001eb118970
	Zm00001eb426740
	Zm00001eb170540
	Zm00001eb433020
	Zm00001eb273840	ZmARF6
	Zm00001eb157270
ILK	Zm00001eb145050
	Zm00001eb153180
	Zm00001eb246710
	Zm00001eb328410
RBOH	Zm00001eb341910
	Zm00001eb040550
	Zm00001eb131620	ZmRBOH1
	Zm00001eb132620
	Zm00001eb293430
	Zm00001eb341260
	Zm00001eb410380
	Zm00001eb154010
	Zm00001eb148780
	Zm00001eb313960
	Zm00001eb081810
	Zm00001eb197890
RUPO	Zm00001eb333690
	Zm00001eb058000
	Zm00001eb395240
	Zm00001eb069500
	Zm00001eb310570
	Zm00001eb194930
	Zm00001eb282360	ZmRUPO1
	Zm00001eb001780
	Zm00001eb232420
	Zm00001eb284940
	Zm00001eb127570
	Zm00001eb378680
	Zm00001eb012850
	Zm00001eb310560
	Zm00001eb139660
	Zm00001eb299910
	Zm00001eb015930
	Zm00001eb070450	ZmRUPO2
	Zm00001eb269330
	Zm00001eb388840
CBL	Zm00001eb139490
	Zm00001eb407510	ZmCBL1
	Zm00001eb135370	ZmCBL2
	Zm00001eb293130	ZmCBL3
	Zm00001eb346310
	Zm00001eb160330
	Zm00001eb407520
	Zm00001eb023890
	Zm00001eb390900
	Zm00001eb368360
	Zm00001eb161280	ZmCBL4
	Zm00001eb203330
	Zm00001eb030890	ZmCBL5
CIPK	Zm00001eb129820
	Zm00001eb015210	ZmCIPK1
	Zm00001eb195230
	Zm00001eb001940
	Zm00001eb099440	ZmCIPK2
	Zm00001eb111520
	Zm00001eb406290
	Zm00001eb417440
	Zm00001eb403620
	Zm00001eb276580
	Zm00001eb016180	ZmCIPK3
	Zm00001eb196030
	Zm00001eb386410
	Zm00001eb163480
	Zm00001eb338230
	Zm00001eb312910	ZmCIPK4
	Zm00001eb300010
	Zm00001eb406220	ZmCIPK5
	Zm00001eb353170
	Zm00001eb350770	ZmCIPK6
	Zm00001eb328710
	Zm00001eb118540	ZmCIPK7
	Zm00001eb330590
	Zm00001eb331220
	Zm00001eb370550	ZmCIPK8
	Zm00001eb406250
	Zm00001eb110900
	Zm00001eb330600
	Zm00001eb152500	ZmCIPK9
	Zm00001eb337620	ZmCIPK10
	Zm00001eb111510
	Zm00001eb197050
	Zm00001eb232690	ZmCIPK11
	Zm00001eb162810
	Zm00001eb286750
	Zm00001eb408610	ZmCIPK12
	Zm00001eb338250
	Zm00001eb110020
	Zm00001eb292760
	Zm00001eb041140	ZmCIPK13
	Zm00001eb149390
	Zm00001eb312900
	Zm00001eb370540
	Zm00001eb179790
CPK	Zm00001eb190570
	Zm00001eb439810
	Zm00001eb230910
	Zm00001eb105890
	Zm00001eb002180
	Zm00001eb187630
	Zm00001eb060140
	Zm00001eb411450
	Zm00001eb091710
	Zm00001eb344900
	Zm00001eb117300
	Zm00001eb093410
	Zm00001eb102690
	Zm00001eb196210
	Zm00001eb060110
	Zm00001eb061860
	Zm00001eb159530
	Zm00001eb289970
	Zm00001eb094770
	Zm00001eb318330	ZmCPK1
	Zm00001eb032840
	Zm00001eb358560
	Zm00001eb198360
	Zm00001eb133780
	Zm00001eb428080
	Zm00001eb408020
	Zm00001eb361020	ZmCPK2
	Zm00001eb324690
	Zm00001eb213240
	Zm00001eb132720
	Zm00001eb139060
	Zm00001eb200920
	Zm00001eb322620
	Zm00001eb212430
	Zm00001eb200350
	Zm00001eb150340
	Zm00001eb072810
	Zm00001eb369270
	Zm00001eb107190
	Zm00001eb213280
MAPK	Zm00001eb133330
	Zm00001eb058410
	Zm00001eb243440
	Zm00001eb333450	ZmMAPKK1
	Zm00001eb219160
	Zm00001eb425450
	Zm00001eb243650
	Zm00001eb214180
	Zm00001eb404640
	Zm00001eb121300
	Zm00001eb377050
	Zm00001eb082720
	Zm00001eb134490
	Zm00001eb012000
	Zm00001eb120370
	Zm00001eb216200
	Zm00001eb192730
	Zm00001eb179120
	Zm00001eb146500
	Zm00001eb289200
	Zm00001eb055060
	Zm00001eb315470
	Zm00001eb078950
	Zm00001eb043420
	Zm00001eb001590
	Zm00001eb277790
	Zm00001eb192580	ZmMAPKK2
	Zm00001eb127880
	Zm00001eb038470	ZmMAPKK3
	Zm00001eb382260
	Zm00001eb138690
	Zm00001eb206610
	Zm00001eb062710
	Zm00001eb057640
	Zm00001eb311780
	Zm00001eb417200
	Zm00001eb296880
	Zm00001eb193510
	Zm00001eb338190
	Zm00001eb214220
	Zm00001eb397190
	Zm00001eb031270
	Zm00001eb054830
	Zm00001eb374270
	Zm00001eb339710
	Zm00001eb146890	ZmMAPKK4
	Zm00001eb117980
	Zm00001eb422820
	Zm00001eb296920
	Zm00001eb427480
	Zm00001eb257600
	Zm00001eb204920
	Zm00001eb327690
	Zm00001eb055820	ZmMAPKK5
	Zm00001eb218810
	Zm00001eb249950
	Zm00001eb021340
	Zm00001eb075500
	Zm00001eb154530	ZmMAPKK6
	Zm00001eb216150
	Zm00001eb337510
	Zm00001eb136220
	Zm00001eb058470	ZmMAPKK7
	Zm00001eb411070
	Zm00001eb013100
	Zm00001eb366610
	Zm00001eb099000
	Zm00001eb168730
	Zm00001eb220060
	Zm00001eb051510	ZmMAPKK8
	Zm00001eb127490
	Zm00001eb398160
	Zm00001eb169760
	Zm00001eb434400
	Zm00001eb067530
	Zm00001eb258360	ZmMAPKK9
	Zm00001eb238820
	Zm00001eb011480
	Zm00001eb245690
	Zm00001eb288850	ZmMAPKK10
	Zm00001eb392580
	Zm00001eb333760
	Zm00001eb181940
	Zm00001eb327780
	Zm00001eb023880	ZmMAPKK11
	Zm00001eb000920
	Zm00001eb135710
	Zm00001eb058490
	Zm00001eb301200	ZmMAPKK12
NPF	Zm00001eb152400
	Zm00001eb277160
	Zm00001eb366570	ZmNPF1
	Zm00001eb025860
	Zm00001eb023610
	Zm00001eb371840	ZmNPF2
	Zm00001eb133760
	Zm00001eb000390
	Zm00001eb425550
	Zm00001eb342280
	Zm00001eb287950
	Zm00001eb335710	ZmNPF3
	Zm00001eb385450
	Zm00001eb289280
	Zm00001eb252750
	Zm00001eb434430
	Zm00001eb251540
	Zm00001eb025400
	Zm00001eb188080
	Zm00001eb023600
	Zm00001eb025880
	Zm00001eb287980
	Zm00001eb162570
	Zm00001eb304390
	Zm00001eb108840
	Zm00001eb090200
	Zm00001eb287970
	Zm00001eb032240
	Zm00001eb146350
	Zm00001eb365540
	Zm00001eb201040
	Zm00001eb046170
	Zm00001eb078860
	Zm00001eb381860
	Zm00001eb082170
	Zm00001eb170950	ZmNPF4
	Zm00001eb153210	ZmNPF5
	Zm00001eb245250
	Zm00001eb033080
	Zm00001eb025420
	Zm00001eb189000
	Zm00001eb380020
	Zm00001eb009980
	Zm00001eb146380	ZmNPF6
	Zm00001eb003170	ZmNPF7
	Zm00001eb055470
	Zm00001eb025900
	Zm00001eb067510
	Zm00001eb310680
	Zm00001eb112180
	Zm00001eb217190
	Zm00001eb288020
	Zm00001eb211600
	Zm00001eb025870
	Zm00001eb180070
	Zm00001eb144350	ZmNPF8
	Zm00001eb062900
	Zm00001eb046210	ZmNPF9
	Zm00001eb416090	ZmNPF10
	Zm00001eb288010	ZmNPF11
	Zm00001eb222030
	Zm00001eb112670
	Zm00001eb251130
	Zm00001eb289290
	Zm00001eb146390
	Zm00001eb252740
	Zm00001eb251550
	Zm00001eb348700	ZmNPF12
	Zm00001eb025410
	Zm00001eb126980
	Zm00001eb088210	ZmNPF13
	Zm00001eb009990	ZmNPF14
	Zm00001eb034670
	Zm00001eb025890	ZmNPF15
	Zm00001eb430150
	Zm00001eb053220	ZmNPF16
	Zm00001eb032250
	Zm00001eb152390
	Zm00001eb199740
MYB	Zm00001eb319620
	Zm00001eb074810
	Zm00001eb195850
	Zm00001eb245040
	Zm00001eb028820
	Zm00001eb405470
	Zm00001eb086570
	Zm00001eb212880
	Zm00001eb040070
	Zm00001eb216040	ZmMYB1
	Zm00001eb129490
	Zm00001eb080690	ZmMYB2
	Zm00001eb201150
	Zm00001eb072200
	Zm00001eb099830
	Zm00001eb312600
	Zm00001eb332030	ZmMYB3
	Zm00001eb402890
	Zm00001eb155610
	Zm00001eb273580
	Zm00001eb405510
	Zm00001eb417190
	Zm00001eb286230
	Zm00001eb041330
	Zm00001eb201930
	Zm00001eb273750
	Zm00001eb416400
	Zm00001eb328280
	Zm00001eb111710
	Zm00001eb299750
	Zm00001eb018070
	Zm00001eb340000
	Zm00001eb438900
	Zm00001eb109820
	Zm00001eb014390
	Zm00001eb321920	ZmMYB4
	Zm00001eb361680
	Zm00001eb312120
	Zm00001eb099570
	Zm00001eb136760
	Zm00001eb029300
	Zm00001eb427380
	Zm00001eb190160	ZmMYB5
	Zm00001eb386370
	Zm00001eb178050	ZmMYB6
	Zm00001eb340740
	Zm00001eb072260
	Zm00001eb106790
	Zm00001eb041450
	Zm00001eb280660
	Zm00001eb396390
	Zm00001eb313580
	Zm00001eb336500
	Zm00001eb440440
	Zm00001eb307400	ZmMYB7
	Zm00001eb360510
	Zm00001eb255300	ZmMYB8
	Zm00001eb035590
	Zm00001eb014350
	Zm00001eb324070
	Zm00001eb014260
	Zm00001eb373660
	Zm00001eb395580
	Zm00001eb248590
	Zm00001eb179650
	Zm00001eb361040	ZmMYB9
	Zm00001eb162680	ZmMYB10
	Zm00001eb185920
	Zm00001eb033610
	Zm00001eb328600
	Zm00001eb257280
	Zm00001eb058880	ZmMYB11
	Zm00001eb286260
	Zm00001eb224600
	Zm00001eb438950
	Zm00001eb202670
	Zm00001eb130260
	Zm00001eb360850
	Zm00001eb273570
	Zm00001eb013670
	Zm00001eb184890
	Zm00001eb125520
	Zm00001eb187810
	Zm00001eb367660
	Zm00001eb417620
	Zm00001eb138640	ZmMYB12
	Zm00001eb266370
	Zm00001eb335060
	Zm00001eb221780
	Zm00001eb367870
	Zm00001eb128760
	Zm00001eb146230
	Zm00001eb369190
	Zm00001eb014370
	Zm00001eb429940
	Zm00001eb142770
	Zm00001eb055540
	Zm00001eb247370
	Zm00001eb348760
	Zm00001eb154560
	Zm00001eb219740	ZmMYB13
	Zm00001eb014430
	Zm00001eb295060
	Zm00001eb028610
	Zm00001eb286270
	Zm00001eb164740
	Zm00001eb429830
	Zm00001eb354510	ZmMYB14
	Zm00001eb284910
	Zm00001eb229870
	Zm00001eb415180
	Zm00001eb014290
	Zm00001eb014320
	Zm00001eb268770
	Zm00001eb103730	ZmMYB15
	Zm00001eb109860	ZmMYB16
	Zm00001eb015120
	Zm00001eb426670
	Zm00001eb192770
	Zm00001eb213800
	Zm00001eb136720	ZmMYB17
	Zm00001eb220890
	Zm00001eb050770
	Zm00001eb354750
	Zm00001eb119340
	Zm00001eb158910	ZmMYB18
	Zm00001eb121290
	Zm00001eb312160
	Zm00001eb430000
	Zm00001eb426280	ZmMYB19
	Zm00001eb440400
	Zm00001eb247570
	Zm00001eb387370
	Zm00001eb041320
	Zm00001eb289320	ZmMYB20
	Zm00001eb148320
	Zm00001eb342580	ZmMYB21
	Zm00001eb130020
	Zm00001eb339810
	Zm00001eb139600
	Zm00001eb234690
	Zm00001eb392230
	Zm00001eb155190	ZmMYB22
	Zm00001eb237460	ZmMYB23
	Zm00001eb199170
	Zm00001eb278680	ZmMYB24
	Zm00001eb266360
	Zm00001eb123130
	Zm00001eb156520
	Zm00001eb150140
	Zm00001eb185160
	Zm00001eb040160
	Zm00001eb275490
	Zm00001eb049000
	Zm00001eb294560
	Zm00001eb014280
	Zm00001eb379110
	Zm00001eb366540
	Zm00001eb060980
	Zm00001eb165000
	Zm00001eb095690
	Zm00001eb417170
	Zm00001eb128770
	Zm00001eb410950
	Zm00001eb405450
	Zm00001eb095760
	Zm00001eb138920
	Zm00001eb041540
	Zm00001eb075640
	Zm00001eb248560	ZmMYB25
	Zm00001eb003470	ZmMYB26
	Zm00001eb424660
	Zm00001eb014420
	Zm00001eb045780
PIN	Zm00001eb389260
	Zm00001eb158690
	Zm00001eb196240
	Zm00001eb143310
	Zm00001eb150590
	Zm00001eb375720
	Zm00001eb372180	ZmPIN1
	Zm00001eb194640
	Zm00001eb154930	ZmPIN2
	Zm00001eb254390
CPA	Zm00001eb067920
	Zm00001eb019340
	Zm00001eb345450
	Zm00001eb432390
	Zm00001eb231990
	Zm00001eb162620
	Zm00001eb392740
	Zm00001eb342260
KT	Zm00001eb329760
	Zm00001eb355740
	Zm00001eb318200
	Zm00001eb368510
	Zm00001eb029370
	Zm00001eb021320
	Zm00001eb269490
	Zm00001eb266800
	Zm00001eb397350
	Zm00001eb139740
	Zm00001eb134710
	Zm00001eb369820
	Zm00001eb198300
	Zm00001eb386990
	Zm00001eb052760
	Zm00001eb034120
	Zm00001eb156760
	Zm00001eb320460
	Zm00001eb136830
HAK/HKT/KUP	Zm00001eb253500
	Zm00001eb330610
	Zm00001eb373020
	Zm00001eb275630	ZmHAK6
	Zm00001eb360080
	Zm00001eb387750	ZmHAK1
	Zm00001eb126490	ZmHAK2
	Zm00001eb084600
	Zm00001eb048950
	Zm00001eb341570
	Zm00001eb070910
	Zm00001eb176380
	Zm00001eb413730
	Zm00001eb142370
	Zm00001eb363430
	Zm00001eb421580
	Zm00001eb070330
	Zm00001eb033850
	Zm00001eb048940
	Zm00001eb314520
	Zm00001eb322400
	Zm00001eb089550
	Zm00001eb274060
	Zm00001eb430810	ZmHAK3
	Zm00001eb052300	ZmHAK4
	Zm00001eb311560	ZmHAK5
	Zm00001eb306800
	Zm00001eb084630
	Zm00001eb048960
	Zm00001eb330230
	Zm00001eb118350
	Zm00001eb189940
	Zm00001eb141980
	Zm00001eb099220
	Zm00001eb048930
	Zm00001eb280380
	Zm00001eb071150
	Zm00001eb016160	ZmHAK7
